# Supplementary material for: Precious metal complexes of bis(pyridyl)allenes: synthesis and catalytic and medicinal applications
Source: Royal Society of Chemistry journal article supplement (doi:10.1039/d1dt02929k), 2021-01-01
Supplement: d1dt02929k1.pdf [file d1dt02929k1.pdf]

## Precious Metal Complexes of Bis(pyridyl)allenes: Synthesis, Catalytic and Medicinal Applications

Hanna K. Maliszewska,<sup>a</sup> Carla Arnau del Valle,<sup>a</sup> Ying Xia,<sup>b</sup> María J. Marín,<sup>a</sup> Zoë Waller<sup>b,c</sup> and María Paz Muñoz<sup>a\*</sup>

<sup>a</sup>School of Chemistry, University of East Anglia, Norwich Research Park, Norwich, NR4 7TJ, UK. E-mail: [m.munoz-herranz@uea.ac.uk](mailto:m.munoz-herranz@uea.ac.uk)

<sup>b</sup>School of Pharmacy, University of East Anglia, Norwich Research Park, Norwich, NR4 7TJ, UK.

<sup>c</sup>School of Pharmacy, UCL, 29-39 Brunswick Square, London, WC1N 1AX, UK.

### Table of contents

|                                                                                                |    |
|------------------------------------------------------------------------------------------------|----|
| 1. General information .....                                                                   | 2  |
| 2. Synthetic details .....                                                                     | 3  |
| 2.1. Synthesis of bis(pyridyl)allenes .....                                                    | 3  |
| 2.2. Synthesis of metal complexes .....                                                        | 12 |
| 2.3. General procedure for the Mizoroki-Heck coupling .....                                    | 19 |
| 2.4. General procedure for metal-catalysed cyclisation of enynes <b>8</b> and <b>19</b> .....  | 19 |
| 2.5. General procedure for metal-catalysed alkoxylation of enynes <b>8</b> and <b>19</b> ..... | 21 |
| 2.6. General procedure for metal-catalysed addition to allenes .....                           | 23 |
| 3. Spectral data .....                                                                         | 26 |
| 4. X-ray structure determination .....                                                         | 53 |
| 5. Stability in solution .....                                                                 | 57 |
| 6. Antimicrobial studies .....                                                                 | 60 |
| 7. Anticancer studies .....                                                                    | 80 |
| 8. DNA studies .....                                                                           | 82 |
| 8.1. General experimental .....                                                                | 82 |
| 8.2. FID assay .....                                                                           | 82 |
| 8.3. CD-melting experiments .....                                                              | 84 |
| 9. References .....                                                                            | 89 |

## 1. General information

All reagents and solvents used in the described syntheses were of analytical grade and purchased from commercial suppliers, including all Grignard reagents (Merck, Thermo Fisher Scientific, Fluorochem); used without further purification, unless otherwise stated. Dry solvents (anhydrous  $\geq 99.8\%$ ) were obtained directly from commercial sources.  $\text{ZnBr}_2$  was dried with a heat gun in *vacuo* until it became visibly dry. Preparation of compounds **1a-b**, **3b** and **4b** was previously described by our group,<sup>1</sup> but have also been included here for clarity. Enynes **8** and **19** and allene **10** used in catalytic screening were prepared according to reported methods.<sup>2,3</sup> Accurate weights were obtained with a Denver Instrument SI-234 balance (230 g x 0.1 mg) for synthetic experiments and with a Mettler Toledo XS205DU (81/120 g x 0.01/0.1 mg) for the preparation of stock solutions. For thin layer chromatography (TLC) technique, commercially available aluminium sheets pre-coated with silica gel (0.20 mm with fluorescent indicator UV254, Grace GM BH & Co) were used. Column chromatography was performed using silica gel 60, 0.032-0.063 mm (230-450 mesh, Alfa Aesar). Ratios of the solvents used as eluents are given in brackets. For compounds isolated as a part of the mixture, the given yield was calculated for the compound in question only, provided that other components of the mixture were known. Non-conventional heating by microwave irradiation was performed in a Biotage Initiator<sup>+</sup> Microwave system equipment with normal absorption level, with the exception of reactions carried out in 1,4-dioxane where low level of absorption was applied. The  $^1\text{H}$  nuclear magnetic resonance (NMR) and  $^{13}\text{C}$  NMR spectra were recorded using a Bruker AscendTM 500 or a Bruker UltrashieldTM Plus 400 spectrometers (solvent given in brackets). Chemical shifts ( $\delta$ ) are given in parts per million (ppm) and the values of coupling constant  $J$  are given in Hertz (Hz). Abbreviations for multiplicities are as follows: s – singlet, d – doublet, t – triplet, q – quartet, m – multiplet, brs – signal broadened. Spectra were recorded at room temperature unless stated otherwise. 2D NMR experiments: correlation spectroscopy (COSY) and heteronuclear single quantum coherence spectroscopy (HSQC) were performed to assign proton and carbon peaks, respectively. In some cases, they were supported with nuclear Overhauser effect spectroscopy (NOESY) and heteronuclear multiple bond coherence spectroscopy (HMBC) experiments to facilitate structure elucidation. High resolution mass spectra were carried out using electro spray ionisation (ESI), electron impact (EI), nano spray ionisation (NSI) and atmospheric solid analysis probe ASAP techniques at the University of Sussex (UK) and National Mass Spectrometry Facility in Swansea (UK). ESI measurements were carried out on APEX II Bruker Daltonic Fourier transformer (FTMS) using Apollo ESI source. EI ionisation was performed using AutoSpec Fisons instrument. NSI measurements were carried out on LTQ Orbitrap XL spectrometer. ASAP measurements were carried out Xevo G2-S spectrometer. Microanalysis was performed with Thermo Flash 2000 Elemental

Analyser configured for for %CHN, at the London Metropolitan University (UK). For the plate assays, absorbance and fluorescence measurements were carried out using a CLARIOstar® (BMG Labtech) microplate reader at rt. Cyclic voltammetry was performed using an Autolab PGSTAT302N potentiostat/galvanostat (Metrohm) with a three-electrode system. The glassy carbon working electrode was polished using alumina. The counter electrode was Pt, and Ag or Ag/AgCl was used as a reference electrode with ferrocene internal standard (Fc/Fc<sup>+</sup>) at 0.43 V vs. Ag/AgCl. The electrochemical cell was purged with Ar prior and after addition of the analyte solution.

**Ethical statement:** The DNA and the anticancer experiments use synthetic DNA sequences and cultured human cell lines that do not have any associated ethic approvals. The antimicrobial work carried out by the CO-ADD was performed in strict accordance with The Australian Code for the Responsible Conduct of Research (2018). Human blood was sourced from the Australian Red Cross Blood Service with informed consent, and its use in haemolysis assays was approved by The University of Queensland Institutional Human Research Ethics Committee, Approval Number 2014000031.

## 2. Synthetic details

### 2.1. Synthesis of bis(pyridyl)allenes

- General synthetic strategy

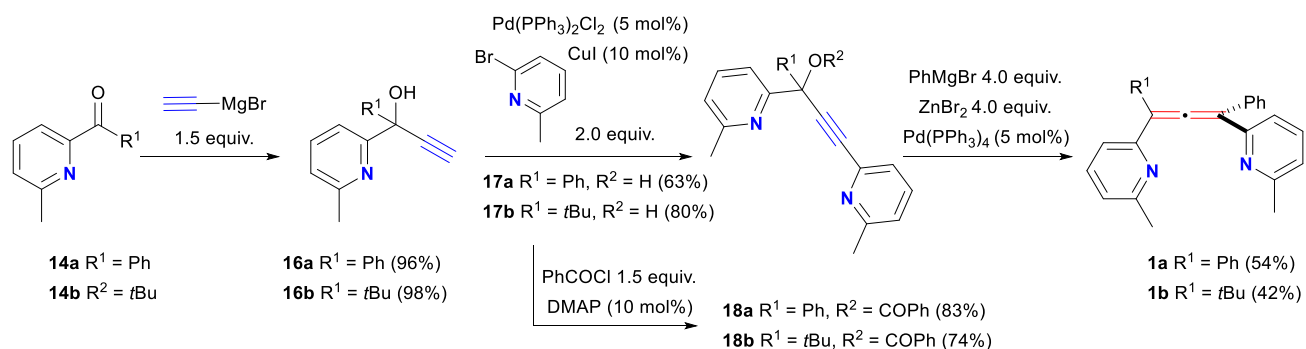

- Synthesis of ketones **14a-b**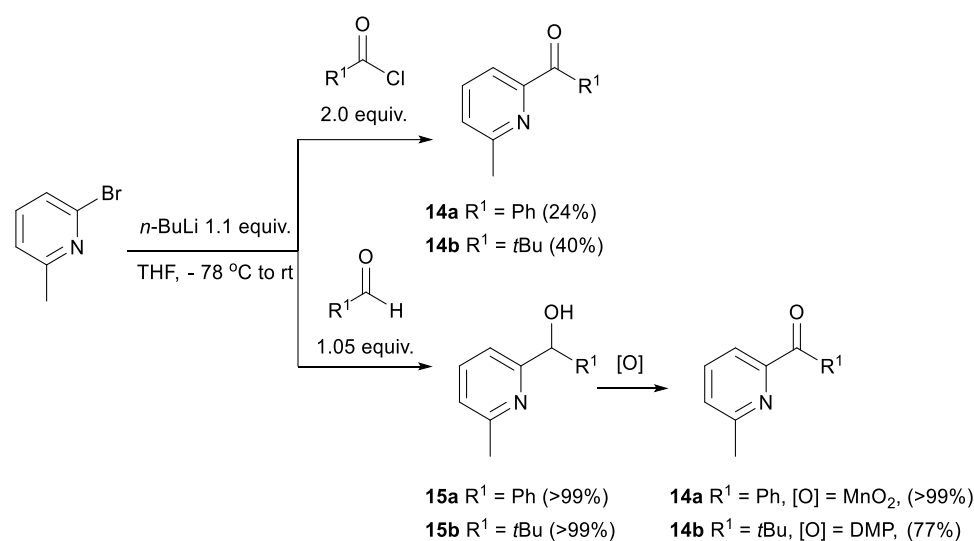Compound **14a**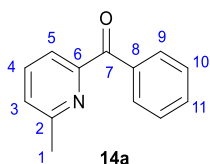

**Procedure a:**<sup>4</sup> To a solution of 2-bromo-6-methylpyridine (1.032 g, 6.00 mmol, 1.0 equiv.) in 10 mL of anhydrous THF, *n*-BuLi solution in hexanes (2.96 mL, 6.60 mmol, 1.1 equiv.) was added dropwise at -78 °C under inert atmosphere. The resulting deep red solution was stirred at -78 °C for 1 h. Subsequently it was transferred *via* cannula to the solution of benzoyl chloride (1.692 g, 12.00 mmol, 2.0 equiv.) in 13 mL of THF pre-cooled to -78 °C. The resulting solution was stirred at -78 °C for another 1 h, then was slowly warmed to rt and left stirring overnight. The solution changed colour to yellow. The solution was then quenched with water and the resulting mixture was poured into 20 mL of 30% aqueous NaOH solution and stirred at rt for 1 h. The aqueous layer was separated and extracted with Et<sub>2</sub>O and the combined organic layers were washed with water, brine, dried over MgSO<sub>4</sub>, filtered and concentrated in *vacuo*. The crude reaction mixture was purified by two consecutive chromatography columns using silica gel (Pet/AcOEt 94:6) to yield compound **14a** (283 mg, 24%) as a yellow oil.

**Procedure b:**<sup>5</sup> To a solution of alcohol **15a** (3.033 g, 15.24 mmol, 1.0 equiv.) in 76 mL of dichloromethane, activated MnO<sub>2</sub> (5.437 g, 62.49 mmol, 4.1 equiv.) was added and the resulting suspension was stirred at rt for 24 h (monitored by TLC). The reaction mixture was filtered through a pad of Celite and concentrated in *vacuo* to yield pure ketone **14a** (3.002 g, > 99%) as a yellow oil.

**<sup>1</sup>H NMR** (400 MHz, CDCl<sub>3</sub>) δ 8.12 – 8.07 (m, 2H, 10), 7.80 – 7.73 (m, 2H, H<sub>Py</sub>), 7.58 (t, *J* = 7.5 Hz, 1H, 11), 7.47 (t, *J* = 7.5 Hz, 2H, 9), 7.34 (dd, *J* = 6.8, 1.9 Hz, 1H, H<sub>Py</sub>), 2.63 (s, 3H, 1); **<sup>13</sup>C NMR** (101 MHz, CDCl<sub>3</sub>) δ 194.1 (7), 157.9 (C<sub>Py</sub>), 154.9 (C<sub>Py</sub>), 137.2 (4), 136.4 (8), 133.0 (11), 131.3 (2 x C<sub>Ph</sub>-H), 128.2 (2 x C<sub>Ph</sub>-H), 125.9 (C<sub>Py</sub>-H), 121.8 (C<sub>Py</sub>-H), 24.7 (1).

The characterisation data is in agreement with previously reported.<sup>6</sup>

#### Compound 15a<sup>4</sup>

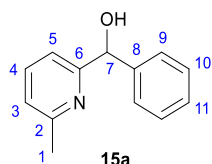

To a solution of 2-bromo-6-methylpyridine (516 mg, 3.00 mmol, 1.0 equiv.) in 4.5 mL of anhydrous THF, *n*-BuLi solution in hexanes (1.48 mL, 3.30 mmol, 1.1 equiv.) was added dropwise at -78 °C under inert atmosphere and stirred for another 20 min. Benzaldehyde (0.32 mL, 3.2 mmol, 1.05 equiv.) was added dropwise at -78 °C and the solution was allowed to warm to rt and stirring continued for 3 h. NH<sub>4</sub>Cl<sub>(aq)</sub> was added and the aqueous layer was separated and extracted with dichloromethane. Combined organic layers were dried over MgSO<sub>4</sub>, filtered and concentrated in *vacuo*. The crude was purified by column chromatography using silica gel (AcOEt/Pet 2:3) to yield alcohol **15a** (597 mg, > 99%) as a yellow semisolid.

**<sup>1</sup>H NMR** (500 MHz, CDCl<sub>3</sub>) δ 7.49 (t, *J* = 7.7 Hz, 1H, 4), 7.40 – 7.36 (m, 2H, H<sub>Ph</sub>), 7.36 – 7.31 (m, 2H, H<sub>Ph</sub>), 7.30 – 7.25 (m, 1H, 11), 7.04 (d, *J* = 7.7 Hz, 1H, H<sub>Py</sub>), 6.90 (d, *J* = 7.7 Hz, 1H, H<sub>Py</sub>), 5.70 (brs, 2H, 7,-OH), 2.60 (s, 3H, 1); **<sup>13</sup>C NMR** (126 MHz, CDCl<sub>3</sub>) δ 160.0 (C<sub>Py</sub>), 156.7 (C<sub>Py</sub>), 143.5 (8), 137.3 (4), 128.6 (2 x C<sub>Ph</sub>-H), 127.9 (11), 127.3 (2 x C<sub>Ph</sub>-H), 122.0 (C<sub>Py</sub>-H), 118.5 (C<sub>Py</sub>-H), 74.6 (7), 24.3 (1).

The characterisation data is in agreement with previously reported.<sup>6</sup>

#### Compound 14b

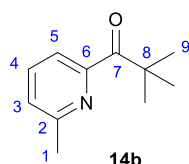

**Procedure a:**<sup>4</sup> To a solution of 2-bromo-6-methylpyridine (1.032 g, 6.00 mmol, 1.0 equiv.) in 10.2 mL of anhydrous THF, *n*-BuLi solution in hexanes (2.96 mL, 6.60 mmol, 1.1 equiv.) was added dropwise at -78 °C under inert atmosphere. The resulting deep red solution was stirred

at -78 °C for 1 h. Subsequently it was transferred *via* cannula to a solution of pivaloyl chloride (1.447 g, 12.00 mmol, 2.0 equiv.) in 2 mL of THF pre-cooled to -78 °C. The resulting solution was stirred at -78 °C for another 2 h, the colour changed to orange. The solution was slowly warmed to rt and left stirring overnight. Then, 5 mL of water was added, and the resulting mixture was poured into 50 mL of 40% aqueous NaOH solution and stirred at rt for 3.5 h. The aqueous layer was separated and extracted with Et<sub>2</sub>O and the combined organic layers were washed with brine, dried over MgSO<sub>4</sub>, filtered and concentrated in *vacuo*. The crude reaction mixture was purified by column chromatography using silica gel (Pet/AcOEt 50:1) to yield compound **14b** (424 mg, 40%) as a pale yellow oil slightly contaminated with pivaloyl chloride.

**Procedure b:** To a solution of alcohol **15b** (2.452 g, 13.70 mmol, 1.0 equiv.) in 108 mL dichloromethane, the Dess-Martin periodinane (6.970 g, 16.40 mmol, 1.2 equiv.) was added at 0 °C. The reaction mixture was slowly warmed to rt. After a total of 4 h, aqueous NaHCO<sub>3</sub> was added. The aqueous layer was separated and the organic layer was washed with NaHCO<sub>3(aq)</sub>, brine, dried over MgSO<sub>4</sub>, filtered and concentrated in *vacuo*. Crude product was purified by column chromatography using silica gel (Pet/AcOEt 9:1) to yield compound **14b** (1.864 g, 77%) as a yellow oil.

**<sup>1</sup>H NMR** (500 MHz, CDCl<sub>3</sub>) δ 7.69 – 7.62 (m, 2H, *H<sub>Py</sub>*), 7.22 (dd, *J* = 7.0, 1.7 Hz, 1H, *H<sub>Py</sub>*), 2.58 (s, 3H, 1), 1.45 (s, 9H, 9); **<sup>13</sup>C NMR** (126 MHz, CDCl<sub>3</sub>) δ 207.3 (7), 156.7 (*C<sub>Py</sub>*), 154.4 (*C<sub>Py</sub>*), 136.9 (*C<sub>Py</sub>*-H), 125.4 (*C<sub>Py</sub>*-H), 120.6 (*C<sub>Py</sub>*-H), 44.4 (8), 27.8 (9), 24.5 (1); **HRMS** (ESI) (C<sub>11</sub>H<sub>16</sub>NO) [M+H]<sup>+</sup>: calcd: 178.1226; found: 178.1225.

#### Compound 15b<sup>4</sup>

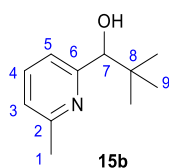

To a solution of 2-bromo-6-methylpyridine (2.236 g, 13.00 mmol, 1.0 equiv.) in 19.4 mL of anhydrous THF, *n*-BuLi solution in hexanes (5.96 mL, 14.30 mmol, 1.1 equiv.) was added dropwise at -78 °C under inert atmosphere and stirred for another 20 min. Pivalaldehyde (1.48 mL, 13.65 mmol, 1.05 equiv.) was added dropwise at -78 °C and the solution was allowed to warm to rt and stirring continued for 3.5 h. NH<sub>4</sub>Cl<sub>(aq)</sub> was added and the aqueous layer was separated and extracted with dichloromethane. The combined organic layers were dried over MgSO<sub>4</sub>, filtered and concentrated in *vacuo* to yield pure alcohol **15b** (2.327 g, > 99%) as a yellow solid.

**<sup>1</sup>H NMR** (400 MHz, CDCl<sub>3</sub>) δ 7.49 (t, *J* = 7.7 Hz 1H, 4), 7.01 (d, *J* = 7.7 Hz, 1H, 5), 6.96 (d, *J* = 7.7 Hz, 1H, 3), 4.61 (d, *J* = 7.1 Hz, 1H, -OH), 4.29 (d, *J* = 7.1 Hz, 1H, 7), 2.52 (s, 3H, 1), 0.90 (s, 9H, 9); **<sup>13</sup>C NMR** (101 MHz, CDCl<sub>3</sub>) δ 159.0 (6), 156.7 (2), 135.8 (4), 121.8 (3), 119.8 (5), 80.0 (7), 36.3 (8), 26.0 (9), 24.4 (1); **HRMS** (ESI) (C<sub>11</sub>H<sub>17</sub>NONa) [M+Na]<sup>+</sup>: calcd: 202.1202; found: 202.1201.

The characterisation data is in agreement with previously reported.<sup>7</sup>

### Compound 16a<sup>8</sup>

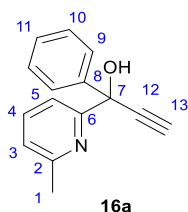

To a solution of ketone **14a** (1.576 g, 8.00 mmol, 1.0 equiv.) in anhydrous THF (32.0 mL), a commercially available solution of ethynylmagnesium bromide (24.0 mL, 0.5 M in THF, 1.5 equiv.) was added at 0 °C under inert atmosphere. The reaction mixture was warmed to rt and then heated at reflux overnight. After cooling to rt, the reaction was quenched with aqueous NH<sub>4</sub>Cl. The aqueous layer was separated and extracted with Et<sub>2</sub>O. The combined organic layers were washed with brine, dried over MgSO<sub>4</sub>, filtered and concentrated in *vacuo* to afford alcohol **16a** (1.705 g, 96%) as a black oil that was used without further purification.

**<sup>1</sup>H NMR** (400 MHz, CDCl<sub>3</sub>) δ 7.70 – 7.64 (m, 2H, 9), 7.56 (t, *J* = 7.7 Hz, 1H, 4), 7.38 – 7.32 (m, 2H, 10), 7.30 – 7.25 (m, 1H, 11), 7.19 (d, *J* = 7.7 Hz, 1H, *H*<sub>Py</sub>), 7.09 (d, *J* = 7.7 Hz, 1H, *H*<sub>Py</sub>), 6.95 (brs, 1H, -OH), 2.77 (s, 1H, 13), 2.60 (s, 3H, 1); **<sup>13</sup>C NMR** (101 MHz, CDCl<sub>3</sub>) δ 159.7 (*C*<sub>Py</sub>), 156.1 (*C*<sub>Py</sub>), 143.8 (8), 138.0 (4), 128.4 (2 x *C*<sub>Ph-H</sub>), 128.0 (11), 126.5 (2 x *C*<sub>Ph-H</sub>), 122.6 (*C*<sub>Py-H</sub>), 118.7 (*C*<sub>Py-H</sub>), 86.0 (12), 74.5 (13), 72.8 (7), 24.2 (1); **HRMS** (ESI) (C<sub>15</sub>H<sub>14</sub>NO) [M+H]<sup>+</sup>: calcd: 224.1070; found: 224.1069.

### Compound 16b<sup>8</sup>

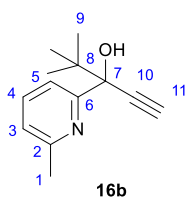

To a solution of ketone **14b** (1.876 g, 10.60 mmol, 1.0 equiv.) in anhydrous THF (42.5 mL), a commercially available solution of ethynylmagnesium bromide (31.8 mL, 0.5 M in THF, 1.5 equiv.) was added at 0 °C under inert atmosphere. The reaction mixture was warmed to rt and then heated at reflux for 3 h. After cooling to rt, the reaction was quenched with aqueous NH<sub>4</sub>Cl. The aqueous layer was separated and extracted with dichloromethane. Combined organic layers were washed with brine, dried over MgSO<sub>4</sub>, filtered and concentrated in *vacuo* to afford alcohol **16b** (2.119 g, 98%) as a brown solid that was used without further purification.

**<sup>1</sup>H NMR** (400 MHz, CDCl<sub>3</sub>) δ 7.60 (t, *J* = 7.7 Hz, 1H, 4), 7.45 (d, *J* = 7.7 Hz, 1H, *H*<sub>Py</sub>), 7.09 (d, *J* = 7.7 Hz, 1H, *H*<sub>Py</sub>), 6.14 (brs, 1H, -OH), 2.54 (s, 3H, 1), 2.51 (s, 1H, 11), 0.99 (s, 9H, 9); **<sup>13</sup>C NMR** (101 MHz, CDCl<sub>3</sub>) δ 157.8 (*C*<sub>Py</sub>), 155.7 (*C*<sub>Py</sub>), 136.6 (4), 122.3 (*C*<sub>Py</sub>-H), 120.1 (*C*<sub>Py</sub>-H), 86.1 (10), 77.1 (7), 72.8 (11), 40.2 (8), 25.4 (9), 24.2 (1); **HRMS** (ESI) (C<sub>13</sub>H<sub>18</sub>NO) [M+H]<sup>+</sup>: caclcd: 204.1383; found: 204.1384.

### Compound 17a

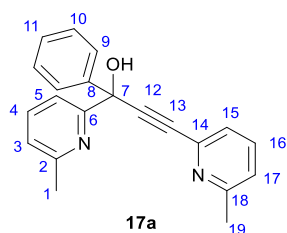

Alkyne **16a** (1.474 g, 6.61 mmol, 1.0 equiv.), Pd(PPh<sub>3</sub>)<sub>2</sub>Cl<sub>2</sub> (232 mg, 0.33 mmol, 0.05 equiv.) and CuI (126 mg, 0.66 mmol, 0.1 equiv.) were placed under inert atmosphere. Triethylamine (16.1 mL) was added followed by 2-bromo-6-methylpyridine (1.5 mL, 13.2 mmol, 2.0 equiv.). The reaction was stirred at rt for 5 h, the reaction mixture turned black. The mixture was filtered through a pad of Celite, washed with dichloromethane and concentrated in *vacuo*. The crude product was purified by column chromatography (Pet/AcOEt/Et<sub>3</sub>N 60/39/1) to yield alcohol **17a** (1.476 g, 63%) as a yellow solid.

**<sup>1</sup>H NMR** (500 MHz, CDCl<sub>3</sub>) δ 7.76 – 7.73 (m, 2H, *H*<sub>Ar</sub>), 7.55 (q, *J* = 7.6 Hz, 2H, *H*<sub>Ar</sub>), 7.37 – 7.34 (m, 3H, *H*<sub>Ph</sub>), 7.31 – 7.27 (m, 2H, *H*<sub>Py</sub>), 7.11 (d, *J* = 7.6 Hz, 1H, *H*<sub>Py</sub>), 7.08 (d, *J* = 7.6 Hz, 1H, *H*<sub>Py</sub>), 7.05 (s, 1H, -OH), 2.61 (s, 3H, 1/19), 2.56 (s, 3H, 1/19); **<sup>13</sup>C NMR** (126 MHz, CDCl<sub>3</sub>) δ 159.6 (*C*<sub>Py</sub>), 158.9 (*C*<sub>Py</sub>), 156.0 (*C*<sub>Py</sub>), 144.0 (*C*<sub>Py</sub>), 142.2 (*C*<sub>Ph</sub>), 138.1 (*C*<sub>Py</sub>-H), 136.5 (*C*<sub>Py</sub>-H), 128.4 (2 x *C*<sub>Ph</sub>-H), 128.0 (11), 126.7 (2 x *C*<sub>Ph</sub>-H), 125.0 (*C*<sub>Py</sub>-H), 123.1 (*C*<sub>Py</sub>-H), 122.5 (*C*<sub>Py</sub>-H), 119.2 (*C*<sub>Py</sub>-H), 91.0 (12), 85.5 (13), 73.3 (7), 24.6 (1), 24.2 (19); **HRMS** (ASAP) (C<sub>21</sub>H<sub>19</sub>N<sub>2</sub>O) [M+H]<sup>+</sup>: caclcd: 315.1497; found: 315.1494.



## Compound 17b

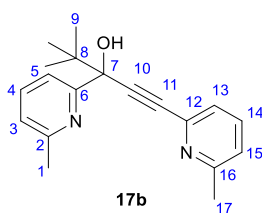

Alkyne **16b** (2.122 g, 10.45 mmol, 1.0 equiv.), Pd(PPh<sub>3</sub>)<sub>2</sub>Cl<sub>2</sub> (367 mg, 0.52 mmol, 0.05 equiv.) and CuI (200 mg, 1.05 mmol, 0.1 equiv.) were placed under inert atmosphere. 25.5 mL of triethylamine was added followed by 2-bromo-6-methylpyridine (3.699 g, 20.90 mmol, 2.0 equiv.). The reaction was stirred at rt for 5 h, the reaction mixture turned black. The mixture was filtered through a pad of Celite, washed with dichloromethane and concentrated in *vacuo*. The crude product was purified by column chromatography (AcOEt/Pet 1:4 to 1:1) to yield alcohol **17b** (2.450 g, 80%) as a yellow solid.

<sup>1</sup>H NMR (500 MHz, CDCl<sub>3</sub>) δ 7.61 (m, 2H, *H*<sub>Py</sub>), 7.56 – 7.48 (m, 1H, *H*<sub>Py</sub>), 7.32 (d, *J* = 7.5 Hz, 1H, *H*<sub>Py</sub>), 7.13 – 7.05 (m, 2H, *H*<sub>Py</sub>), 6.25 (brs, 1H, -OH), 2.57 (brs, 3H, 1/17), 2.56 (s, 3H, 1/17), 1.07 (s, 9H, 9); <sup>13</sup>C NMR (126 MHz, CDCl<sub>3</sub>) δ 158.8 (*C*<sub>Py</sub>), 157.7 (*C*<sub>Py</sub>), 155.5 (*C*<sub>Py</sub>), 142.6 (*C*<sub>Py</sub>), 136.7 (4/14), 136.3 (4/14), 124.9 (*C*<sub>Py</sub>-H), 122.7 (*C*<sub>Py</sub>-H), 122.3 (*C*<sub>Py</sub>-H), 120.5 (*C*<sub>Py</sub>-H), 91.5 (10), 84.2 (11), 77.5 (7), 40.7 (8), 25.6 (9), 24.6 (1/17), 24.2 (1/17); HRMS (ESI) (C<sub>19</sub>H<sub>23</sub>N<sub>2</sub>O) [M+H]<sup>+</sup>: calcd: 295.1805; found: 295.1807.

General procedure A for esterification of propargyl alcohols<sup>9</sup>

An oven-dried round bottom flask was charged with DMAP (0.1 equiv.) and triethylamine (1.5 equiv.) and purged with N<sub>2</sub>. A solution of propargyl alcohol in anhydrous dichloromethane (0.2 M, 1.0 equiv.) was added, followed by benzoyl chloride (1.5 equiv.) added at 0 °C. The reaction mixture was warmed to rt; the progress of the reaction was monitored by TLC analysis. Upon completion water was added, the aqueous layer was separated and extracted with dichloromethane, the combined organic layers were washed with NaHCO<sub>3</sub>, brine, dried over MgSO<sub>4</sub>, filtered and concentrated in *vacuo*. Purification by column chromatography with the indicated mixture of Pet/AcOEt as the eluent yielded benzoate esters **18a-b**.

## Compound 18a

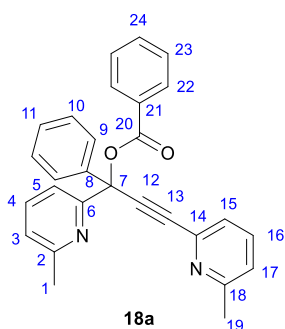

Synthesised according to **General procedure A** from alcohol **17a** (945 mg, 3.01 mmol). Stirred at rt overnight. Column chromatography (Pet/AcOEt 4:1) yielded ester **18a** (1.047 g, 83%) as a yellow semisolid.

**<sup>1</sup>H NMR** (500 MHz, CDCl<sub>3</sub>) δ 8.17 – 8.14 (m, 2H, *H<sub>Ph</sub>*), 7.83 – 7.80 (m, 2H, *H<sub>Ph</sub>*), 7.76 (d, *J* = 7.8 Hz, 1H, *H<sub>Py</sub>*), 7.60 – 7.55 (m, 2H, *H<sub>Ar</sub>*), 7.53 (t, *J* = 7.8 Hz, 1H, *H<sub>Py</sub>*), 7.46 (t, *J* = 7.7 Hz, 2H, *H<sub>Ar</sub>*), 7.39 (d, *J* = 7.7 Hz, 1H, *H<sub>Py</sub>*), 7.37 – 7.33 (m, 2H, *H<sub>Ar</sub>*), 7.31 – 7.26 (m, 1H, *H<sub>Ar</sub>*), 7.10 (d, *J* = 7.7 Hz, 1H, *H<sub>Py</sub>*), 7.01 (d, *J* = 7.7 Hz, 1H, *H<sub>Py</sub>*), 2.55 (s, 3H, 1/19), 2.45 (s, 3H, 1/19); **<sup>13</sup>C NMR** (126 MHz, CDCl<sub>3</sub>) δ 164.4 (20), 158.9 (*C<sub>Py</sub>*), 158.6 (*C<sub>Py</sub>*), 158.3 (*C<sub>Py</sub>*), 142.2 (*C<sub>Py</sub>*), 141.3 (*C<sub>Ph</sub>*), 136.9 (*C<sub>Py-H</sub>*), 136.3 (*C<sub>Py-H</sub>*), 133.1 (*C<sub>Ph-H</sub>*), 130.9 (*C<sub>Ph</sub>*), 130.0 (*C<sub>Ph-H<sub>2</sub></sub>*), 128.4 (*C<sub>Ph-H<sub>2</sub></sub>*), 128.4 (*C<sub>Ph-H<sub>2</sub></sub>*), 128.2 (*C<sub>Ph-H</sub>*), 126.9 (*C<sub>Ph-H<sub>2</sub></sub>*), 125.3 (*C<sub>Py-H</sub>*), 123.1 (*C<sub>Py-H</sub>*), 122.3 (*C<sub>Py-H</sub>*), 118.2 (*C<sub>Py-H</sub>*), 88.7 (12), 87.5 (13), 80.4 (7), 24.8 (1/19), 24.6 (1/19); **HRMS** (ESI) (C<sub>28</sub>H<sub>22</sub>N<sub>2</sub>O<sub>2</sub>Na) [M+Na]<sup>+</sup>: caclcd: 441.1573; found: 441.1574.

## Compound 18b

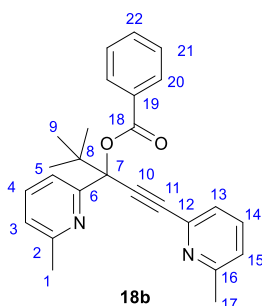

Synthesised according to **General procedure A** from alcohol **17b** (50 mg, 0.17 mmol). Stirred at rt for 2 h 40 min. Column chromatography (Pet/AcOEt/Et<sub>3</sub>N 0.73/0.25/0.02) yielded ester **18b** (50 mg, 74%) as a yellow semisolid contaminated with **17b** (**18b:17b** 3:1). The reaction is not easily scaleable, it is best to do it at a 1.0-1.5 mmol scale.

**<sup>1</sup>H NMR** (500 MHz, CDCl<sub>3</sub>) δ 8.11 – 8.08 (m, 2H, *H<sub>Ph</sub>*), 7.58 – 7.49 (m, 4H, *H<sub>Ar</sub>*), 7.45 (t, *J* = 7.7 Hz, 2H, *H<sub>Ph</sub>*), 7.34 (d, *J* = 7.7 Hz, 1H, *H<sub>Py</sub>*), 7.08 (d, *J* = 7.7 Hz, 1H, *H<sub>Py</sub>*), 7.00 (dd, *J* = 7.0, 1.2 Hz, 1H, *H<sub>Py</sub>*), 2.56 (s, 3H, 1/17), 2.43 (s, 3H, 1/17), 1.25 (s, 9H, 9); **<sup>13</sup>C NMR** (126 MHz, CDCl<sub>3</sub>) δ 164.5 (18), 156.9 (*C<sub>Py</sub>*), 155.7 (*C<sub>Py</sub>*), 135.8 (*C<sub>Py</sub>-H*), 132.8 (*C<sub>Ph</sub>-H*), 131.4 (*C<sub>Py</sub>-H*), 129.9 (2 x *C<sub>Ph</sub>-H*), 128.4 (2 x *C<sub>Ph</sub>-H*), 128.3 (*C<sub>Ph</sub>*), 125.5 (*C<sub>Py</sub>-H*), 123.2 (*C<sub>Py</sub>-H*), 121.9 (*C<sub>Py</sub>-H*), 119.9 (*C<sub>Py</sub>-H*), 84.6 (7), 41.0 (8), 26.1 (9), 25.7 (1/17), 24.7 (1/17). Two *C<sub>sp</sub>* and two *C<sub>q</sub>* not detected; **HRMS** (ESI) (C<sub>26</sub>H<sub>27</sub>N<sub>2</sub>O<sub>2</sub>) [M+H]<sup>+</sup>: calcd: 399.2067; found: 399.2061.

### Allene 1a<sup>1</sup>

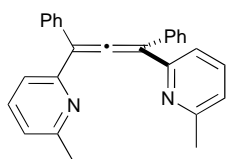

To a suspension of ZnBr<sub>2</sub> in anhydrous THF (0.8 M, 4.0 eq.), a phenylmagnesium bromide solution in Et<sub>2</sub>O (4.0 eq.) was added dropwise at 0 °C under inert atmosphere. Stirring at 0 °C continued for 30 min. Pd(PPh<sub>3</sub>)<sub>4</sub> (62 mg, 0.054 mmol, 0.05 eq.) and the propargyl benzoate **18a** (447 mg, 1.07 mmol, 1.0 eq.) in anhydrous THF (0.25 M solution of ester) were added at 0 °C. Reaction mixture was stirred at 0 °C for 3h. Water was added, aqueous layer was separated and extracted with Et<sub>2</sub>O, combined organic layers were dried over MgSO<sub>4</sub> and concentrated in vacuo. Column chromatography (Pet/AcOEt/NEt<sub>3</sub> 85/14/1) yielded allene **1a** (215 mg, 54%) as a yellow oil.

The characterisation data is in agreement with previously reported.<sup>10</sup>

**<sup>1</sup>H NMR** (500 MHz, CDCl<sub>3</sub>) δ 7.60 – 7.54 (m, 6H), 7.41 (d, *J* = 7.7 Hz, 2H), 7.37 – 7.33 (m, 4H), 7.30 – 7.26 (m, 2H), 7.07 (d, *J* = 7.7 Hz, 2H), 2.58 (s, 6H); **<sup>13</sup>C NMR** (126 MHz, CDCl<sub>3</sub>) δ 212.7, 158.4, 154.8, 136.9, 135.1, 128.7, 128.5, 127.7, 121.9, 121.5, 114.0, 24.8; **MS (EI)** (C<sub>27</sub>H<sub>21</sub>N<sub>2</sub>) [M-H]<sup>+</sup>: calcd: 373; found: 373.

### Allene 1b<sup>1</sup>

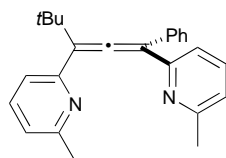

To a suspension of ZnBr<sub>2</sub> in anhydrous THF (0.8 M, 4.0 eq.), a phenylmagnesium bromide solution in Et<sub>2</sub>O (4.0 eq.) was added dropwise at 0 °C under inert atmosphere. Stirring at 0 °C continued for 15 min, followed by 45 min at rt. Pd(PPh<sub>3</sub>)<sub>4</sub> (145 mg, 0.125 mmol, 0.05 eq.) and

the propargyl benzoate **18b** (996 mg, 2.5 mmol, 1.0 eq.) in anhydrous THF (0.25 M solution of ester) were added at 0 °C and stirring at this temperature continued for 15 min. Reaction mixture was brought to rt and stirred overnight. Water was added and the precipitate formed was filtered off. Aqueous layer of the filtrate was separated and extracted with Et<sub>2</sub>O, combined organic layers were dried over MgSO<sub>4</sub> and concentrated in vacuo. Column chromatography (Pet/AcOEt/NEt<sub>3</sub> 93/6/1) yielded allene **1b** (264 mg, 30%) as a yellow oil.

The characterisation data is in agreement with previously reported.<sup>10</sup>

**<sup>1</sup>H NMR** (400 MHz, CDCl<sub>3</sub>) δ 7.55 (t, *J* = 7.7 Hz, 1H), 7.49 (m, 2H), 7.43 (t, *J* = 7.7 Hz, 1H), 7.35 – 7.27 (m, 4H), 7.26 – 7.21 (m, 1H), 7.04 (d, *J* = 7.6 Hz, 1H), 6.95 (d, *J* = 7.6 Hz, 1H), 2.56 (s, 6H), 1.42 (s, 9H); **<sup>13</sup>C NMR** (101 MHz, CDCl<sub>3</sub>) δ 209.0, 158.1, 157.3, 155.7, 155.6, 136.8, 136.3, 135.8, 128.3, 128.2, 127.1, 121.5, 121.4, 120.9, 120.9, 120.2, 112.1, 36.3, 30.3, 24.8, 24.7; **HRMS (ESI)** (C<sub>25</sub>H<sub>26</sub>N<sub>2</sub>) [M+Na]<sup>+</sup>: caclcd: 377.1988 ; found: 377.1990.

## 2.2.Synthesis of metal complexes

### Compound 2a

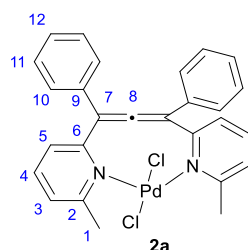

Pd(CH<sub>3</sub>CN)<sub>2</sub>Cl<sub>2</sub> (7 mg, 0.03 mmol, 1.0 equiv.) was added to a solution of allene **1a** (10 mg, 0.027 mmol, 1.0 equiv.) in dichloromethane (0.5 mL) at 12 °C. The reaction mixture changed colour from yellow to red over the course of 40 min. After that time the solution was filtered through a cotton wool plug to remove solid impurities, washed with more dichloromethane and concentrated in *vacuo* to afford **2a** (14 mg, > 99%) as a red solid.

**<sup>1</sup>H NMR** (400 MHz, CDCl<sub>3</sub>) δ 7.66 – 7.61 (m, 4H, 10), 7.56 (t, *J* = 7.6 Hz, 2H, 4), 7.46 – 7.38 (m, 6H, 11, 12), 7.19 (dd, *J* = 7.6, 0.7 Hz, 2H, 3/5), 7.00 (d, *J* = 7.6 Hz, 2H, 3/5), 3.17 (s, 6H, 1); **<sup>13</sup>C NMR** (101 MHz, CDCl<sub>3</sub>) δ 204.1 (8), 160.8 (C<sub>Py</sub>), 160.3 (C<sub>Py</sub>), 138.4 (4), 136.4 (9), 129.7 (2 x C<sub>Ph-H</sub>), 129.0 (2 x C<sub>Ph-H</sub>), 128.9 (12), 124.7 (C<sub>Py-H</sub>), 123.8 (C<sub>Py-H</sub>), 117.9 (7), 26.9 (1); **HRMS (ESI)** (C<sub>27</sub>H<sub>21</sub>N<sub>2</sub><sup>106</sup>Pd) [M-Cl<sub>2</sub>-H]<sup>+</sup>: caclcd: 479.0734; found: 479.0777; **Anal.** Calcd. for C<sub>27</sub>H<sub>25</sub>N<sub>2</sub>PdCl<sub>2</sub>O<sub>1.5</sub> (**2a**+1.5H<sub>2</sub>O): C 56.15, H 4.37, N 4.85; found: C 56.54, H 4.43; N 4.45.

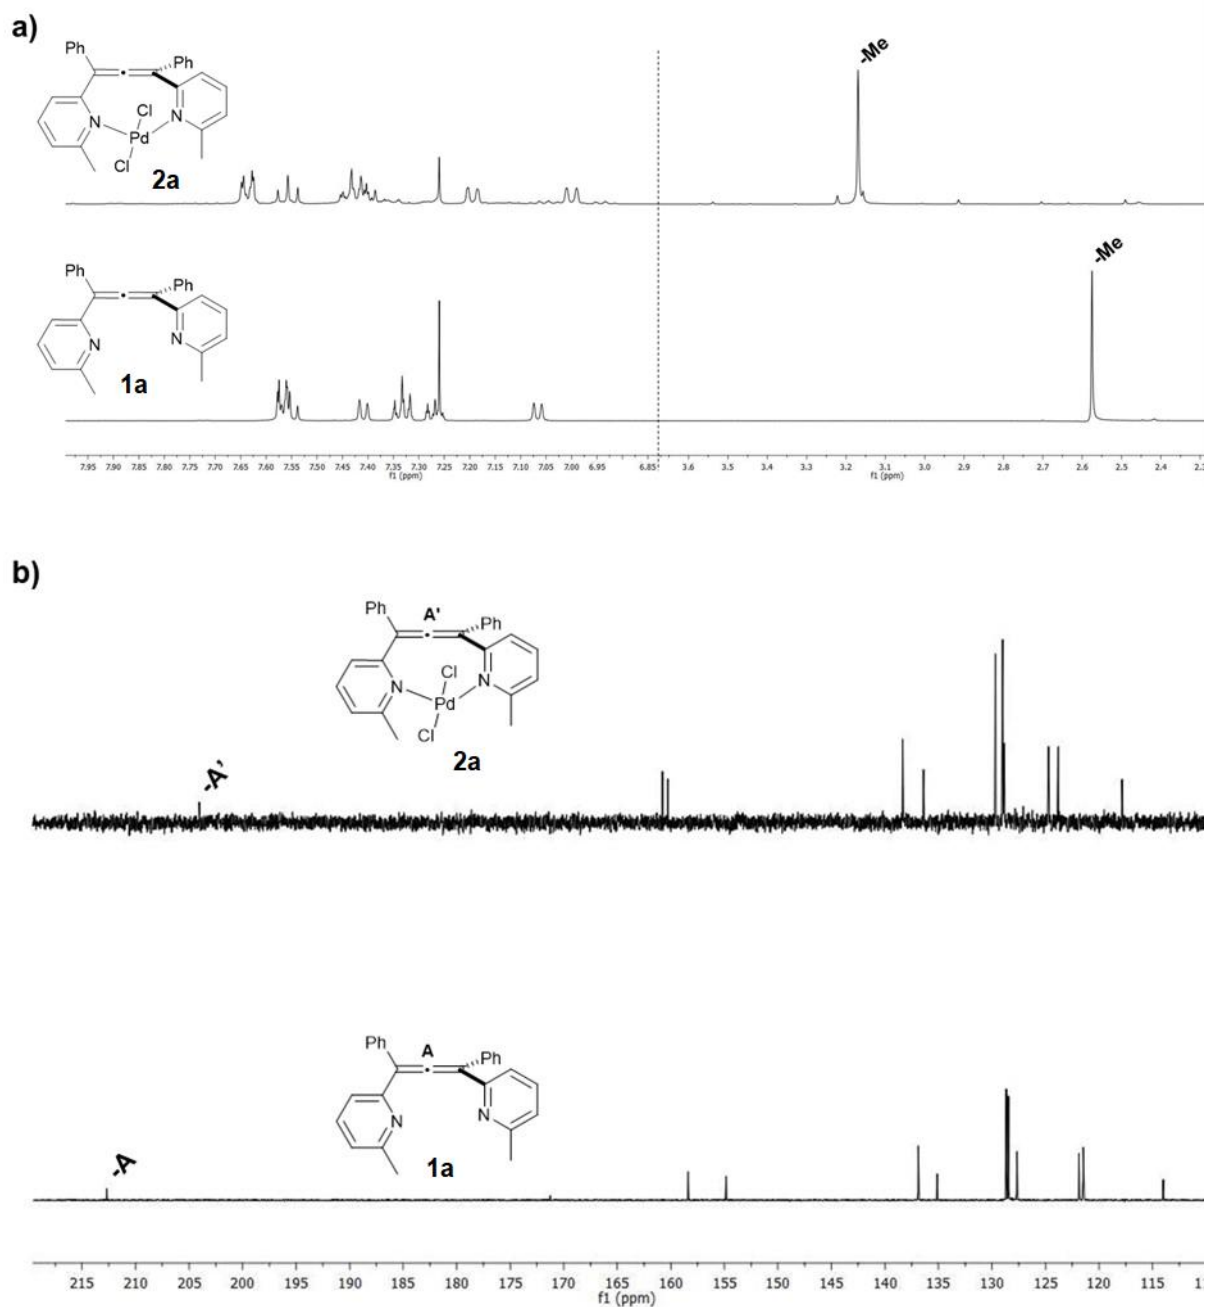**Compound 2b**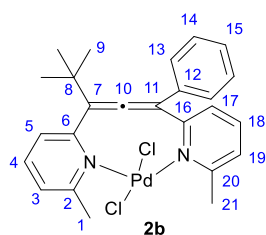

$\text{Pd}(\text{CH}_3\text{CN})_2\text{Cl}_2$  (15 mg, 0.056 mmol, 1.0 equiv.) was added to a solution of allene **1b** (20 mg, 0.056 mmol, 1.0 equiv.) in dichloromethane (0.8 mL) at 12 °C. The reaction mixture changed colour from yellow to red over the course of 40 min. After that time the solution was filtered through a cotton wool plug to remove solid impurities, washed with more dichloromethane and concentrated in *vacuo* to afford **2b** (30 mg, > 99%) as a red solid. Red crystals of **2b** suitable for X-ray crystallography were obtained from vapour diffusion of dichloromethane/MeOH solution and *n*-Hex at 4 °C (see Section 4).

**$^1\text{H}$  NMR** (400 MHz,  $\text{CDCl}_3$ )  $\delta$  7.63 (t,  $J = 7.8$  Hz, 1H, 4/18), 7.57 (t,  $J = 7.8$  Hz, 1H, 4/18), 7.50 – 7.46 (m, 2H, 13), 7.44 (d,  $J = 7.8$  Hz, 1H,  $H_{\text{Py}}$ ), 7.40 – 7.31 (m, 3H, 14, 15), 7.20 (dd,  $J = 7.8$ , 0.8 Hz, 1H,  $H_{\text{Py}}$ ), 7.16 (d,  $J = 7.8$ , 1H,  $H_{\text{Py}}$ ), 7.03 (d,  $J = 7.8$ , Hz, 1H,  $H_{\text{Py}}$ ), 3.17 (s, 3H, 1/21), 3.13 (s, 3H, 1/21), 1.47 (s, 9H, 9);  **$^{13}\text{C}$  NMR** (126 MHz,  $\text{CDCl}_3$ )  $\delta$  202.7 (10), 161.0 ( $C_{\text{Py}}$ ), 160.8 ( $C_{\text{Py}}$ ), 160.4 ( $C_{\text{Py}}$ ), 158.4 ( $C_{\text{Py}}$ ), 138.1 (4/18), 138.0 (4/18), 137.0 (12), 129.5 ( $C_{\text{Ph-H}_2}$ ), 128.9 ( $C_{\text{Ph-H}_2}$ ), 128.5 (15), 124.5 ( $C_{\text{Py-H}}$ ), 124.2 ( $C_{\text{Py-H}}$ ), 123.5 ( $C_{\text{Py-H}}$ ), 123.4 ( $C_{\text{Py-H}}$ ), 121.9 (7/11), 118.2 (7/11), 37.0 (8), 30.9 (9), 27.0 (1/21), 27.0 (1/21); **HRMS** (ESI) ( $\text{C}_{25}\text{H}_{26}\text{N}_2^{106}\text{Pd}^{35}\text{Cl}$ ) [ $\text{M}-\text{Cl}]^+$ : caclcd: 495.0814; found: 495.0824.

#### Attempts to access Pt(II)-bis(pyridyl)allene complexes from Pt(II) precursors

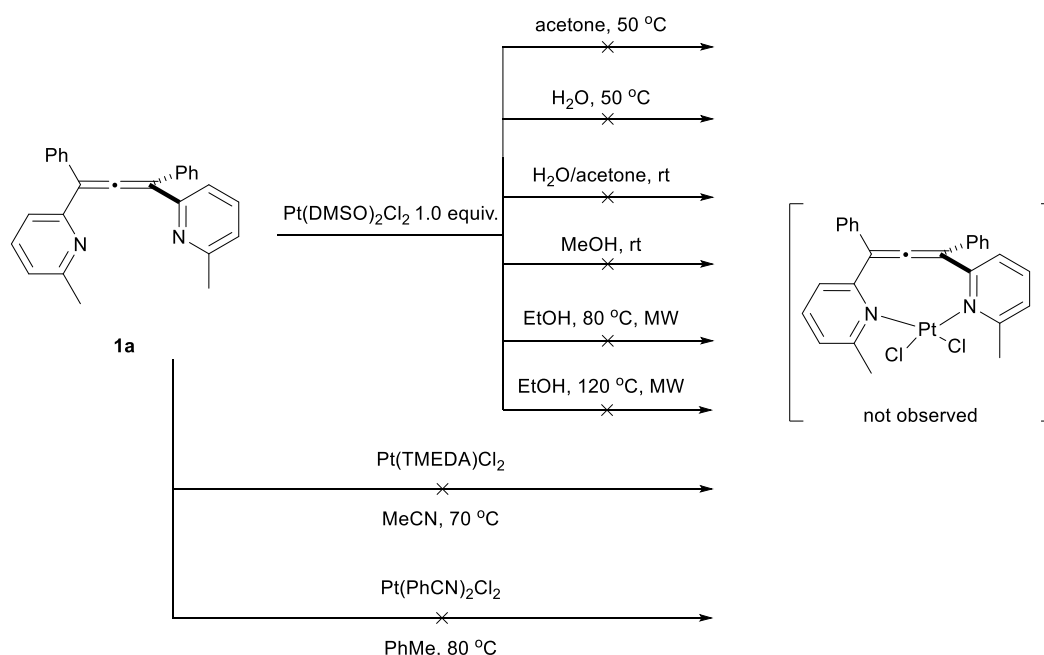

## Attempts to access Pt(II)-bis(pyridyl)allene complexes from Pt(IV) precursors – chemical reduction

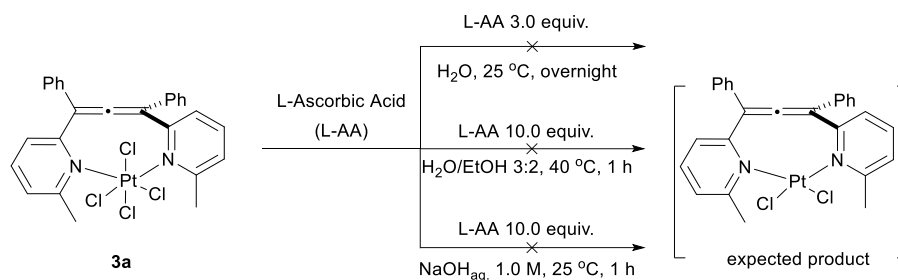

### Compound 3a<sup>11</sup>

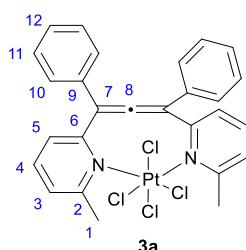

To a solution of  $\text{H}_2\text{PtCl}_6 \cdot 6\text{H}_2\text{O}$  (41 mg, 0.08 mmol, 1.0 equiv.) in MeOH (1.9 mL) solution of **1a** (30 mg, 0.08 mmol) in MeOH (1.9 mL) was added at rt. Upon addition, a precipitate started to form instantaneously. After 40 min of stirring at rt the solid was filtered off, washed with MeOH and dried in *vacuo* to afford **3a** (53 mg, 92%) as a pale orange solid.

**<sup>1</sup>H NMR** (400 MHz, DMSO- $d_6$ )  $\delta$  8.22 (t,  $J = 7.7$  Hz, 2H, 4), 7.75 (d,  $J = 7.7$  Hz, 2H, 3/5), 7.68 (d,  $J = 7.7$  Hz, 2H, 3/5), 7.50 – 7.45 (m, 8H, 10, 11), 7.45 – 7.40 (m, 2H, 12), 2.65 (s, 6H, 1); **<sup>13</sup>C NMR** (101 MHz, DMSO- $d_6$ )  $\delta$  210.3 (8), 156.8 (4), 149.1 ( $C_{\text{PY}}$ ), 143.1 ( $C_{\text{PY}}$ ), 132.6 (9), 129.3 (2 x  $C_{\text{Ph-H}}$ ), 129.1 (12), 127.8 (2 x  $C_{\text{Ph-H}}$ ), 125.8 ( $C_{\text{PY-H}}$ ), 123.7 ( $C_{\text{PY-H}}$ ), 111.3 (7), 21.7 (1); **HRMS** (ESI) ( $\text{C}_{27}\text{H}_{23}^{35}\text{Cl}_3\text{N}_2^{195}\text{Pt}$ ) [ $\text{M}-\text{Cl}+\text{H}$ ]<sup>+</sup>: calcd: 675.0575; found: 675.0565; **Anal.** Calcd. for  $\text{C}_{29.5}\text{H}_{27}\text{Cl}_9\text{N}_2\text{Pt}$  (**3a**+2.5 $\text{CH}_2\text{Cl}_2$ ): C 38.52, H 2.96, N 3.05; found: C 38.55, H 3.45; N 3.25.

### Compound 3b<sup>1</sup>

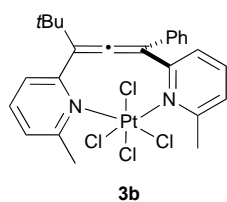

To a solution of  $\text{H}_2\text{PtCl}_6 \cdot 6\text{H}_2\text{O}$  (29 mg, 0.056 mmol, 1.0 equiv.) in MeOH (1.2 ml) solution of **1b** (20 mg, 0.056 mmol) in MeOH (1.2 ml) was added. Upon addition a precipitate started to form

instantaneously. After 40 min of stirring at rt the solid was filtered off, washed with MeOH and dried under vacuum to afford **3b** (36 mg, 93%) as a pale orange solid.

**<sup>1</sup>H NMR** (400 MHz, DMSO)  $\delta$  8.38 (t,  $J = 7.9$  Hz, 1H), 8.18 (t,  $J = 7.8$  Hz, 1H), 7.79 (dd,  $J = 12.9, 7.9$  Hz, 2H), 7.70 (d,  $J = 7.8$  Hz, 1H), 7.64 (d,  $J = 7.8$  Hz, 1H), 7.49 – 7.43 (m, 2H), 7.41 – 7.36 (m, 1H), 7.34 (dd,  $J = 5.3, 3.2$  Hz, 2H), 2.68 (s, 3H), 2.66 (s, 3H), 1.29 (s, 9H); **<sup>13</sup>C NMR** (126 MHz, DMSO, 75 °C)  $\delta$  206.3, 156.3, 156.1, 151.3, 150.9, 141.3, 139.7, 133.7, 128.5, 127.6, 127.1, 124.0, 123.2, 122.2, 122.1, 118.3, 109.1, 35.7, 29.3, 22.2, 21.7; **HRMS (ESI)** ( $C_{25}H_{27}N_{21}^{94}Pt^{35}Cl_4$ )  $[M+H]^+$ : calcd: 692.0727; found: 692.0707; Anal. Calcd. for  $C_{28.5}H_{33}N_2PtCl_{11}$  (**3b**+3.5 $CH_2Cl_2$ ): C 34.80, H 3.38, N 2.85; found: C 34.90, H 3.61; N 3.13.

### Cyclic voltammograms of **3b**

We observed three reduction peaks below -1.0 V on the first voltammogram of **3b** recorded in the direction of positive E values (Figure 2S, a). We assigned the cathodic peak **A** at -1.1 V to a Pt(IV)/Pt(II) reduction event, whereas peaks **B-C** in more negative potential range perhaps arose from the reductions of the allene ligand fragment. When the experiment was run in the opposite direction we could also observe an oxidation event. We determined by narrowing the range of potential window to **A** peak only (Figure 2S, b), that the new anodic oxidation peak **A'** at 0.06 V was associated with **A** (Figure 2S, c). Initial Pt(IV)/Pt(II) reduction was probably followed by partial re-oxidation of resulting Pt(II) species. However, such re-oxidation would not lead to the original Pt(IV) complex, because in that case we would see a more symmetric voltammogram, corresponding to a classic two electron reversible process. What is more, the irreversible Pt(IV)/Pt(II) reduction is usually combined with a loss of two axial chloride ligands (electrochemical-chemical process) and therefore regeneration of the initial analyte is not likely. The corresponding values for **A** and **A'** peaks for complex **3a** under the same experimental conditions were -1.0 V and 0.19 V, respectively.



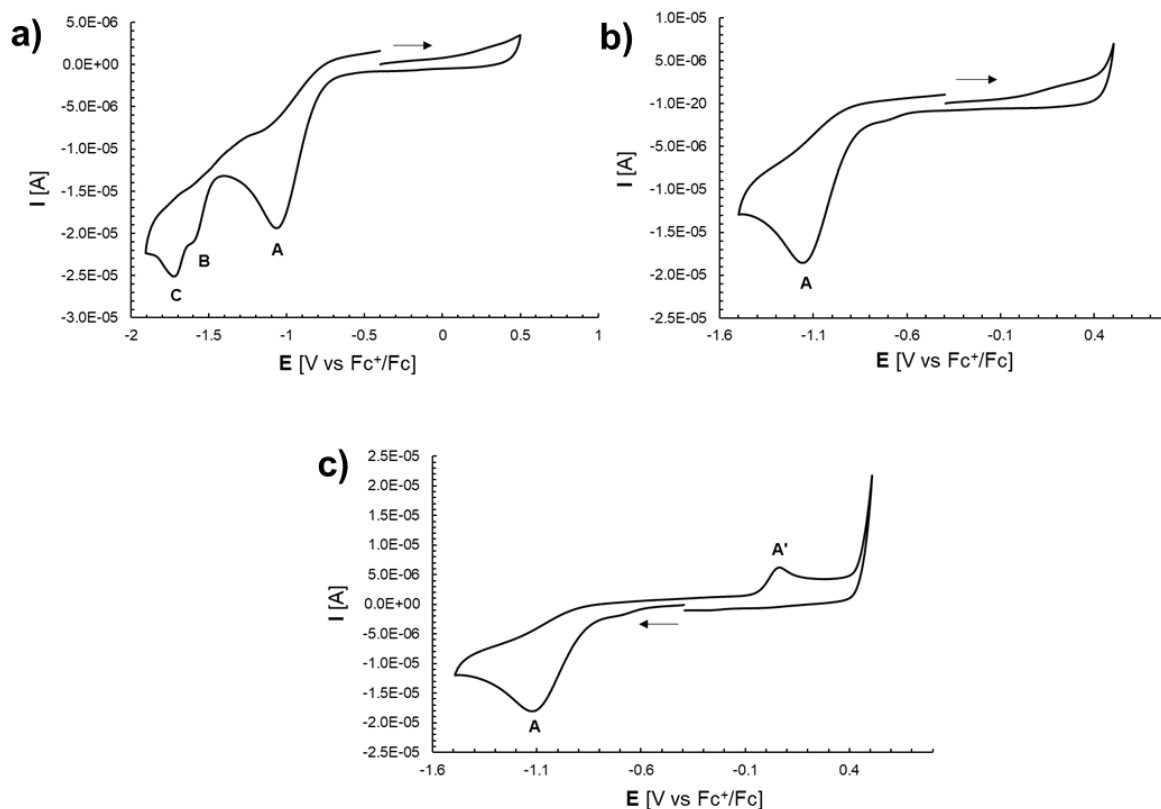

**Figure 2S.** Voltammograms of a solution of **3b** at 1.6 mM, in 0.1 M (*n*-Bu<sub>4</sub>N)(PF<sub>6</sub>) DMSO solution with a scan rate of 100 mV/s at rt at a glassy carbon working electrode: a-b) recorded in a direction of positive E values; c) recorded in a direction of negative E values. Potentials referenced to ferrocene internal standard.

#### Compound 4a

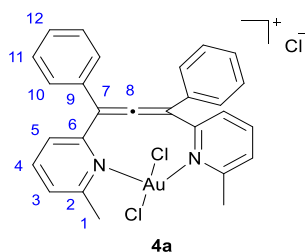

A solution of allene **1a** (30 mg, 0.08 mmol, 1.0 equiv.) in EtOH (0.35 mL) was added to a solution of H<sub>2</sub>AuCl<sub>4</sub>·H<sub>2</sub>O (27 mg, 0.08 mmol, 1.0 equiv.) in EtOH (0.35 mL) at rt followed by water (0.14 mL) and NaPF<sub>6</sub> (27 mg, 0.16 mmol, 2.0 equiv.). After a few minutes an orange precipitate started to form. After 1 h 45 min the solid was filtered off, washed with EtOH, dried in *vacuo* to yield **4a** (23 mg, 43%) as a dark orange solid.

<sup>1</sup>H NMR (400 MHz, DMSO-*d*<sub>6</sub>) δ 8.06 (t, *J* = 7.7 Hz, 2H, 4), 7.63 (d, *J* = 7.7 Hz, 2H, 3/5), 7.54 (d, *J* = 7.7 Hz, 2H, 3/5), 7.50 – 7.44 (m, 8H, 10, 11), 7.45 – 7.38 (m, 2H, 12), 2.61 (s, 6H, 1);

**$^{13}\text{C}$  NMR** (101 MHz, DMSO- $d_6$ )  $\delta$  211.1 (8), 157.3 ( $C_{Ar}$ ), 150.7 ( $C_{Ar}$ ), 141.2 ( $C_{PY-H}$ ), 133.4 (9), 129.1 (10/11), 128.7 (12), 127.9 (10/11), 124.8 ( $C_{PY-H}$ ), 122.7 ( $C_{PY-H}$ ), 112.0 (7), 22.5 (1); **HRMS** (NSI) ( $\text{C}_{27}\text{H}_{22}\text{N}_2\text{Au}^{35}\text{Cl}_2$ )  $[\text{M}-\text{Cl}]^+$ : caclcd: 641.0820; found: 641.0816; ( $\text{C}_{27}\text{H}_{22}\text{N}_2\text{Au}$ )  $[\text{M}-3\text{Cl}]^+$ : caclcd: 571.1443; found: 571.1429; **Anal.** Calcd. for  $\text{C}_{29}\text{H}_{28}\text{N}_2\text{AuCl}_3\text{O}$  (**4a**+1.0 $\text{C}_2\text{H}_5\text{OH}$ ): C 48.19, H 3.91, N 3.88; found: C 48.57, H 3.53; N 4.11.

### Compound 4b

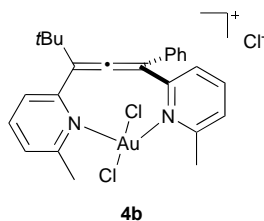

To a solution of  $\text{HAuCl}_4 \cdot x\text{H}_2\text{O}$  (15.4 mg, 0.045 mmol, 1.0 equiv.) in methanol (0.5 ml) solution of **1b** (16 mg, 0.045 mmol, 1.0 equiv.) in 0.5 ml of methanol was added. The mixture was heated at reflux. After 30 min yellow precipitate started to form. After a total of 130 min, yellow solid was isolated by filtration, washed with MeOH and dried under vacuum to yield **5b** as 0.17:1 mixture of **5b'** and **5b''** (6 mg, 20%) as a yellow solid. The remaining filtrate was concentrated to yield **4b** (18 mg, 60%) as a yellow solid. Complex **3b** was previously characterised.<sup>1</sup>

### Complex 4b:

**$^1\text{H}$  NMR** (500 MHz, MeOD)  $\delta$  8.17 (t,  $J = 7.9$  Hz, 1H), 8.11 (t,  $J = 7.9$  Hz, 1H), 7.68 (d,  $J = 7.8$  Hz, 1H), 7.64 (d,  $J = 7.8$  Hz, 1H), 7.59 (d,  $J = 7.8$  Hz, 2H), 7.47 – 7.43 (m, 2H), 7.42 – 7.35 (m, 3H), 2.75 (s, 3H), 2.74 (s, 3H), 1.35 (s, 9H);  **$^{13}\text{C}$  NMR** (101 MHz, MeOD)  $\delta$  208.4, 158.4, 158.1, 156.6, 153.0, 152.5, 144.0, 143.2, 134.5, 130.3, 130.0, 129.0, 126.7, 126.3, 124.5, 120.1, 111.5, 37.5, 30.1, 22.3, 22.1; **HRMS (ESI)** ( $\text{C}_{25}\text{H}_{27}\text{Cl}_3\text{N}_2\text{Au}$ )  $[\text{M}+\text{H}]^+$ : Caclcd: 657.0900; found: 657.0950; **Anal. Calcd.** for  $\text{C}_{25.5}\text{H}_{27.5}\text{Cl}_{4.5}\text{N}_2\text{Au}$  (**4b**+0.5 $\text{CHCl}_3$ ): C 42.73, H 3.87, N 3.91; found: C 43.01, H 3.82, N 3.93.

### 2.3. General procedure for the Mizoroki-Heck coupling<sup>12</sup>

The corresponding Pd catalyst (0.005 mmol, 0.02 equiv.) and HCOONH<sub>4</sub> (0.025 mmol, 0.1 equiv.) were placed under N<sub>2</sub>. Anhydrous DMF (0.25 mL) was added, followed by aryl halide (0.25 mmol, 1.0 equiv.), *i*Pr<sub>2</sub>EtN (48mg, 0.38 mmol, 1.5 equiv.) and styrene (31 mg, 0.30 mmol, 1.2 equiv.). The reaction was heated at 80 °C for 16-19 h (overnight) and then cooled to rt, diluted with AcOEt and extracted with ice water (x 5). The organic phase was washed with brine, dried over MgSO<sub>4</sub>, filtered and concentrated in *vacuo* to yield **7** without further purification.

#### Compound 7

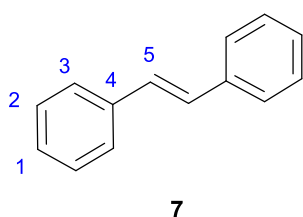

<sup>1</sup>H NMR (400 MHz, CDCl<sub>3</sub>) δ 7.53 – 7.51 (m, 4H, 3), 7.39 – 7.33 (m, 4H, 2), 7.29 – 7.24 (m, 2H, 1), 7.12 (s, 2H, 5); <sup>13</sup>C NMR (101 MHz, CDCl<sub>3</sub>) δ 137.5 (4), 128.8 (5), 128.8 (2), 127.8 (1), 126.7 (3).

The characterisation data is in agreement with previously reported.<sup>13</sup>

### 2.4. General procedure for metal-catalysed cyclisation of enynes **8** and **19**

The catalyst (2-3 mol%) and AgNTf<sub>2</sub> (where applicable) were placed under N<sub>2</sub> and the corresponding solvent (0.5 mL) was added. The mixture was stirred at 25 °C for 5 min. The corresponding enyne (0.1 mmol, 1.0 equiv.) in the same solvent (1.0 mL) was added. Stirring continued for indicated amount of time at indicated temperature. The reaction mixture was filtered through a pad of Celite and concentrated in *vacuo*. The residue was analysed by <sup>1</sup>H NMR to determine the ratio of isomeric products.

#### Compounds **9a**:**9b**:**9c**:**9d** 1:0.08:0.08:0.01

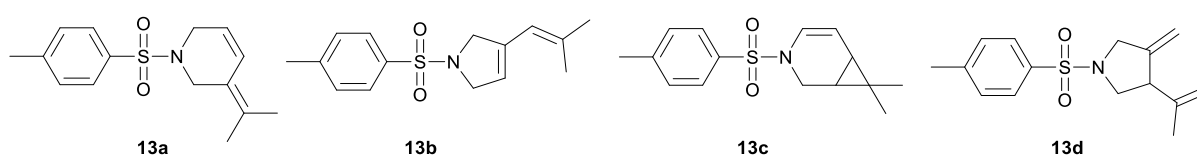

<sup>1</sup>H NMR (400 MHz, CDCl<sub>3</sub>) δ 7.74 – 7.70 (m, 2H, **9b**), 7.67 – 7.62 (m, 2H, **9a**), 7.33 – 7.30 (m, 2H, **9b,c**), 7.28 – 7.25 (m, 2H, **9a**), 6.59 (d, *J* = 8.4 Hz, 1H, **9c**), 6.34 (dt, *J* = 10.3, 2.1 Hz, 1H,

**9a**), 5.61 (s, 1H, **9b**), 5.52 (dt,  $J = 10.3, 3.6$  Hz, 1H, **9a**), 5.38 (s, 1H, **9b**), 5.06 (dd,  $J = 8.4, 4.8$  Hz, 1H, **9c**), 5.01 (d,  $J = 2.1$  Hz, 1H, **9d**), 4.87 – 4.85 (m, 1H, **9d**), 4.84 – 4.82 (m, 1H, **9d**), 4.80 (m, 1H, **9d**), 4.23 (d,  $J = 2.7$  Hz, 2H, **9b**), 4.13 (s, 2H, **9b**), 3.90 (s, 2H, **9a**), 3.76 (s, 2H, **9a**), 3.48 (dd,  $J = 12.2, 1.5$  Hz, 1H, **9c**), 3.36 (dd,  $J = 12.2, 6.0$  Hz, 1H, **9c**), 2.42 (s, 3H, **9b,c**), 2.41 (s, 3H, **9a**), 1.76 (s, 3H, **9a**), 1.74 (s, 3H, **9b**), 1.66 (s, 3H, **9a**), 1.05 (s, 3H, **9c**), 1.02 (d,  $J = 1.1$  Hz, 1H, **9c**), 0.97 (dd,  $J = 8.8, 4.8$  Hz, 1H, **9c**), 0.73 (s, 3H, **9c**).

The characterisation data is in agreement with previously reported.<sup>14–16</sup>

**Table 1S.** Cycloisomerisation of **19** with allene-derived catalysts.

| Entry | Cat.      | AgNTf <sub>2</sub> | t (h) | 19   | 20a | Conv. (%) | Yield (%) |
|-------|-----------|--------------------|-------|------|-----|-----------|-----------|
| 2     | <b>2a</b> | -                  | 1     | 1.0  | -   | 0         | -         |
| 3     | <b>3a</b> | -                  | 1     | 1.0  | -   | 0         | -         |
| 4     | <b>2a</b> | +                  | 1     | 1.0  | -   | 0         | -         |
| 5     | <b>3a</b> | +                  | 1     | 1.0  | -   | 0         | -         |
| 6     | <b>2b</b> | +                  | 1     | 1.0  | -   | 0         | -         |
| 7     | <b>4a</b> | -                  | 1     | 0.15 | 1.0 | 87        | 80        |
| 8     | <b>4b</b> | -                  | 1     | 0.9  | 1.0 | 53        | 53        |

### Compound 20a

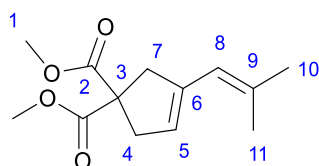

**20a**

**<sup>1</sup>H NMR** (400 MHz, CDCl<sub>3</sub>) δ 5.72 (s, 1H, 8), 5.37 (s, 1H, 5), 3.72 (s, 6H, 1), 3.18 (d,  $J = 1.7$  Hz, 2H, 4), 3.03 (s, 2H, 7), 1.81 (s, 3H, 10/11), 1.77 (s, 3H, 10/11); **<sup>13</sup>C NMR** (101 MHz, CDCl<sub>3</sub>) δ 172.7 (2), 138.8 (9), 135.8 (6), 124.5 (8), 120.7 (5), 59.4 (3), 52.9 (1), 43.4 (4), 40.4 (7), 27.4 (10), 19.9 (11).

The characterisation data is in agreement with previously reported.<sup>17</sup>

## 2.5. General procedure for metal-catalysed alkoxyacylation of enynes **8** and **19**

The catalyst (amount indicated) and AgNTf<sub>2</sub> were placed under N<sub>2</sub>, and MeOH (0.5 mL) was added. The mixture was stirred for 5 min. The corresponding enyne (0.1 mmol, 1.0 equiv.) in MeOH (1.0 mL) was added. Stirring at indicated temperature continued for 16-24 h. The reaction mixture was filtered through a pad of Celite and concentrated in *vacuo*. The residue was analysed by <sup>1</sup>H NMR to determine ratio of isomeric products.

**Table 2S.** Alkoxyacylation of **8** with allene-derived catalysts.

| Entry | Cat.      | AgNTf <sub>2</sub> | T (°C) | <b>8</b> | <b>21</b> | <b>9d</b> | Conv. (%) | Yield (%)       |
|-------|-----------|--------------------|--------|----------|-----------|-----------|-----------|-----------------|
| 1     | <b>2a</b> | 6.5                | 50     | 1.0      | 0.04      | -         | 4         | 3               |
| 2     | <b>2b</b> | 6.5                | 50     | 1.0      | -         | -         | 0         | -               |
| 3     | <b>3a</b> | 6.5                | 50     | 0.65     | 1.0       | 0.13      | 75        | 57 <sup>a</sup> |
| 4     | <b>3b</b> | 6.5                | 50     | 1.0      | 0.79      | 0.11      | 47        | 50 <sup>a</sup> |
| 5     | <b>4a</b> | 4.0                | 50     | 1.0      | 0.13      | -         | 12        | 10              |
| 6     | <b>4b</b> | 4.0                | 50     | 1.0      | 0.2       | -         | 17        | 19              |

<sup>a</sup> Plus 7% of **9d**.

### Compound **21**

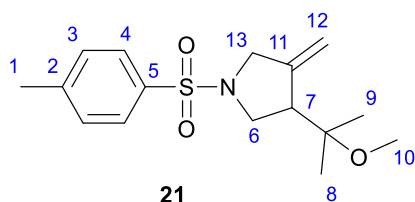

In 1:0.8 mixture of **21**:**8**.

<sup>1</sup>H NMR (400 MHz, CDCl<sub>3</sub>) δ 7.75 – 7.67 (m, 2H, **4**), 7.32 (d, *J* = 8.0 Hz, 2H, **3**), 5.03 (s, 2H, **12**), 3.77 (s, 2H, **13**), 3.39 (dd, *J* = 10.1, 4.4 Hz, 1H, **6**), 3.26 (m, 1H, **6**), 3.09 (s, 3H, **10**), 2.82 – 2.76 (m, 1H, **7**), 2.42 (s, 3H, **1**), 1.11 (s, 3H, **8/9**), 1.00 (s, 3H, **8/9**).

The characterisation data is in agreement with previously reported.<sup>18</sup>

**Table 3S.** Alkoxy cyclisation of **19** with allene-derived catalysts.

| Entry | Cat.      | AgNTf <sub>2</sub> | T (°C) | t (h) | 19   | 22   | 20b  | Conv. (%) | Yield (%)       |
|-------|-----------|--------------------|--------|-------|------|------|------|-----------|-----------------|
| 1     | <b>2a</b> | 6.5                | 35     | 24    | 1.0  | 0.3  | -    | 23        | 26              |
| 2     | <b>2b</b> | 6.5                | 35     | 24    | 1.0  | 0.22 | -    | 18        | 16              |
| 3     | <b>3a</b> | 6.5                | 35     | 24    | 1.0  | 0.6  | 0.26 | 46        | 68 <sup>a</sup> |
| 4     | <b>3b</b> | 6.5                | 35     | 24    | 0.75 | 1.0  | 0.55 | 67        | 77 <sup>a</sup> |
| 5     | <b>4a</b> | 4.0                | 35     | 24    | -    | 1.0  | -    | >99       | >99             |
| 6     | <b>4b</b> | 4.0                | 35     | 24    | -    | 1.0  | -    | >99       | 96              |

<sup>a</sup> Total of **22** and **20b**.**Compound 22**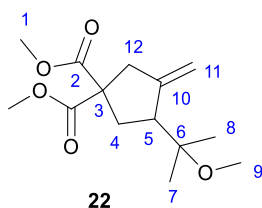

<sup>1</sup>H NMR (400 MHz, CDCl<sub>3</sub>) δ 5.04 – 5.01 (m, 1H, 11), 4.98 – 4.95 (m, 1H, 11), 3.72 (s, 3H, 1), 3.71 (s, 3H, 1), 3.18 (s, 3H, 9), 2.93 – 2.80 (m, 3H, 12, 5), 2.54 (ddd, *J* = 13.5, 8.5, 1.7 Hz, 1H, 4), 2.00 (dd, *J* = 13.5, 9.3 Hz, 1H, 4), 1.17 (s, 3H, 7), 1.11 (s, 3H, 8); <sup>13</sup>C NMR (101 MHz, CDCl<sub>3</sub>) δ 172.2 (2), 172.1 (2), 148.3 (10), 110.7 (11), 76.9 (6), 58.7 (3), 52.9 (1), 52.8 (1), 49.2 (5), 49.1 (9), 43.5 (12), 36.1 (4), 22.8 (9), 22.3 (8).

The characterisation data is in agreement with previously reported.<sup>19</sup>**Compound 20b**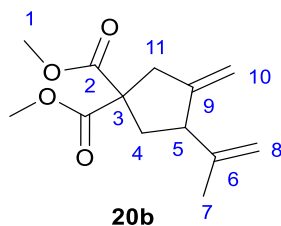In 1:0.33:1 mixture of **20b**:**20a**:**19**.

**<sup>1</sup>H NMR** (400 MHz, CDCl<sub>3</sub>) δ 5.01 (d, *J* = 2.0 Hz, 1H, 10), 4.83 (d, *J* = 1.1 Hz, 2H, 8), 4.79 (dd, *J* = 4.4, 2.0 Hz, 1H, 10), 3.73 (s, 6H, 1), 3.31 – 3.23 (m, 1H, 5), 3.04 (d, *J* = 1.5 Hz, 1H, 11), 2.96 – 2.87 (m, 1H, 11), 2.52 (ddd, *J* = 13.0, 7.8, 1.5 Hz, 1H, 4), 2.12 (dd, *J* = 13.0, 11.3 Hz, 1H, 4), 1.64 (s, 3H, 7).

The characterisation data is in agreement with previously reported.<sup>20</sup>

## 2.6. General procedure for metal-catalysed addition to allenes

The catalyst (0.05 equiv.) and AgNTf<sub>2</sub> (amount indicated) were placed under N<sub>2</sub>, and dichloromethane (0.3 mL) was added. The reaction mixture was stirred at 25 °C for 5 min. A solution of allene **10** (25 mg, 0.13 mmol, 1.0 equiv.) in dichloromethane (0.35 mL) was added, followed by benzyl alcohol (0.13 mL, 1.3 mmol, 10.0 equiv.). The reaction was stirred at 25 °C for the indicated amount of time, then filtered through a pad of Celite and concentrated in *vacuo*. The ratio of products and conversions were calculated based on the <sup>1</sup>H NMR of the crude reaction mixture or the products were isolated by column chromatography (PhMe/AcOEt 19:1).

### Compound 11a

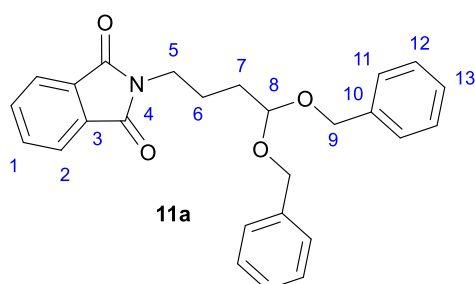

**<sup>1</sup>H NMR** (500 MHz, CDCl<sub>3</sub>) δ 7.84 (dd, *J* = 5.4, 3.0 Hz, 2H, 2), 7.71 (dd, *J* = 5.4, 3.0 Hz, 2H, 1), 7.34 (d, *J* = 4.4 Hz, 8H, 11, 12), 7.31 – 7.26 (m, 2H, 13), 4.78 (t, *J* = 4.5 Hz, 1H, 8), 4.66 (d, *J* = 11.7 Hz, 2H, 9), 4.56 (d, *J* = 11.7 Hz, 2H, 9), 3.72 (t, *J* = 6.5 Hz, 2H, 5), 1.85 – 1.78 (m, 4H, 6, 7); **<sup>13</sup>C NMR** (126 MHz, CDCl<sub>3</sub>) δ 168.5 (4), 138.2 (10), 134.0 (1), 132.2 (3), 128.5 (2 x C<sub>Ph</sub>-H), 127.9 (2 x C<sub>Ph</sub>-H), 127.7 (13), 123.3 (2), 101.8 (8), 67.5 (9), 37.8 (5), 30.9 (7), 24.1 (6); **HRMS** (NSI) (C<sub>26</sub>H<sub>29</sub>N<sub>2</sub>O<sub>4</sub>) [M+NH<sub>4</sub>]<sup>+</sup>: caclcd: 433.2122; found: 433.2116; a fragment from C(8)-O bond cleavage was also observed: (C<sub>19</sub>H<sub>18</sub>NO<sub>3</sub>) [M-OBn]<sup>+</sup>: caclcd: 308.1281; found: 308.1283.

## Compound 12a

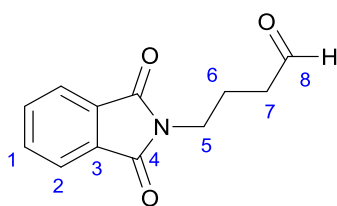

12a

In 36.5:1.13:1.0 mixture of **BnOH**:**11a**:**12a**.

$^1\text{H NMR}$  (500 MHz,  $\text{CDCl}_3$ )  $\delta$  9.77 (s, 1H, -COH), 7.84 (m, 2H, 2), 7.75 – 7.69 (m, 2H, 1), 3.74 (t,  $J = 7.0$  Hz, 1H, 5), 2.54 (t,  $J = 7.0$  Hz, 1H, 7), 2.02 (p,  $J = 7.0$  Hz, 1H, 6).

The characterisation data is in agreement with previously reported.<sup>21</sup>

## Compound 11b

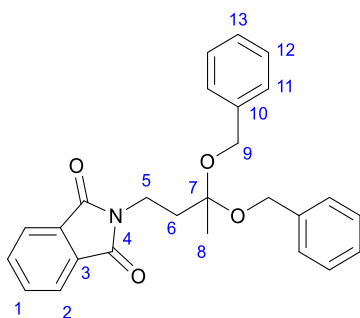

11b

Product **11b** not stable enough for full characterisation and hydrolyses to **12b**.

$^1\text{H NMR}$  (500 MHz,  $\text{CDCl}_3$ )  $\delta$  7.87 – 7.82 (m, 2H, 2), 7.74 – 7.69 (m, 2H, 1), 7.40 – 7.34 (m, 8H, 11, 12), 7.30 (m, 2H, 13), 4.71 (s, 4H, 9), 3.96 (t,  $J = 7.3$  Hz, 2H, 5), 2.88 (t,  $J = 7.3$  Hz, 2H, 6), 1.25 (s, 3H, 8).

## Compound 12b

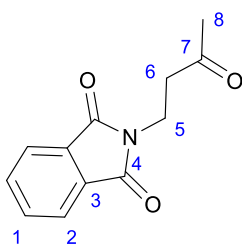

12b



**<sup>1</sup>H NMR** (500 MHz, CDCl<sub>3</sub>) δ 7.86 – 7.82 (m, 2H, 2), 7.74 – 7.69 (m, 2H, 1), 3.96 (t, *J* = 7.4 Hz, 2H, 5), 2.88 (t, *J* = 7.4 Hz, 2H, 6), 2.19 (s, 3H, 8).

The characterisation data is in agreement with previously reported.<sup>22</sup>

### Compound 13

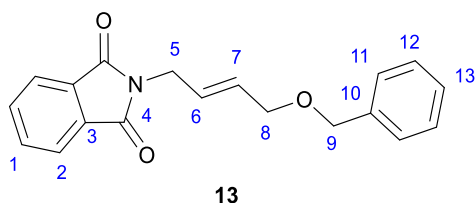

**<sup>1</sup>H NMR** (400 MHz, CDCl<sub>3</sub>) δ 7.87 – 7.81 (m, 2H, 2), 7.73 – 7.68 (m, 2H, 1), 7.38 – 7.29 (m, 4H, 11, 12), 7.28 – 7.22 (m, 1H, 13), 5.89 – 5.76 (m, 2H, 6, 7), 4.48 (s, 2H, 9), 4.34 – 4.27 (m, 2H, 5), 4.00 (m, 2H, 8); **<sup>13</sup>C NMR** (101 MHz, CDCl<sub>3</sub>) δ 168.0 (4), 138.2 (10), 134.1 (1), 132.2 (7), 130.4 (3), 128.5 (2 x C<sub>Ph</sub>-H), 127.8 (2 x C<sub>Ph</sub>-H), 127.7 (13), 126.2 (6), 123.4 (2), 72.3 (9), 69.8 (8), 39.1 (5); **HRMS** (ASAP) (C<sub>19</sub>H<sub>18</sub>NO<sub>3</sub>) [M+H]<sup>+</sup>: calcd: 308.1287; found: 308.1288.

The characterisation data reported for the (*Z*)-isomer of **13** was not in agreement, hence the structure of (*E*)-isomer proposed.<sup>22</sup>

## 3. Spectral data

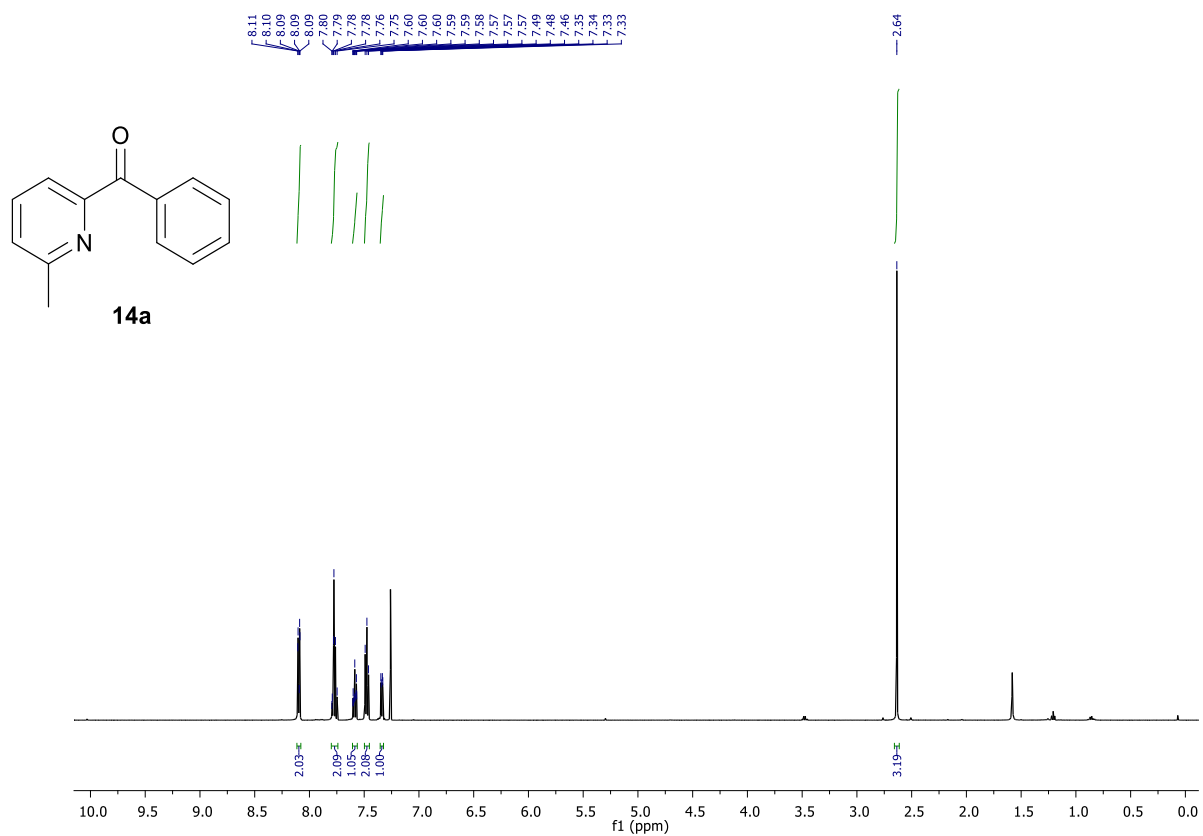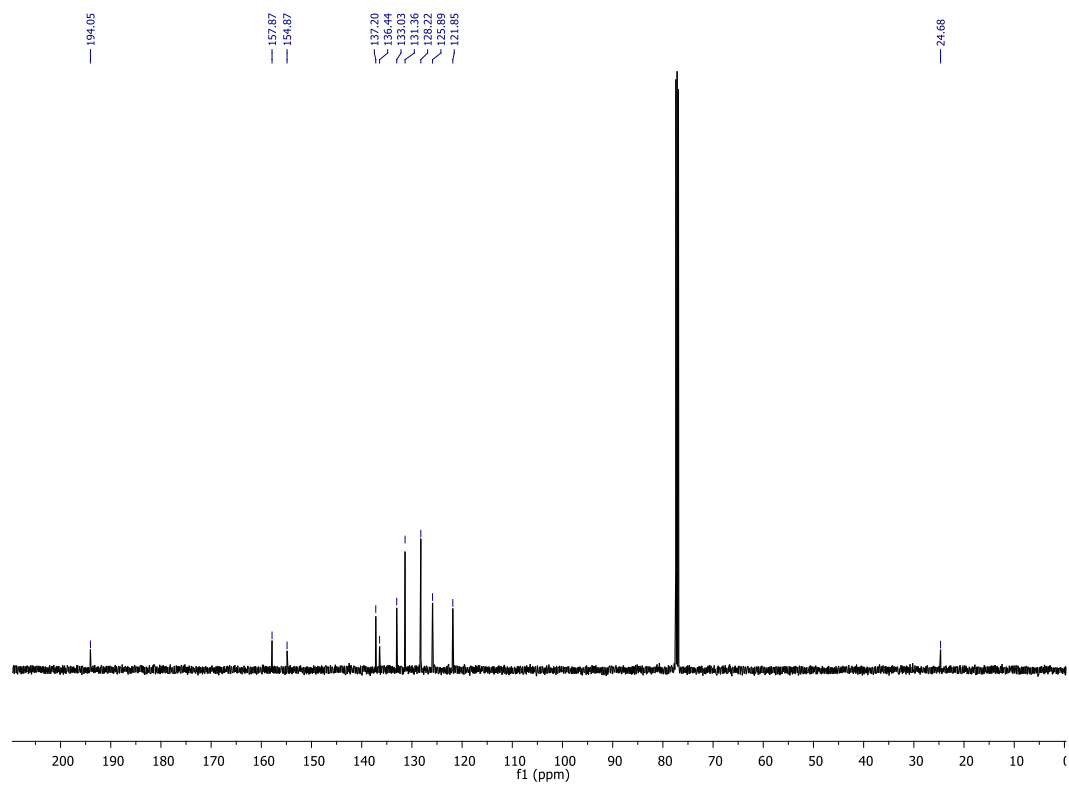

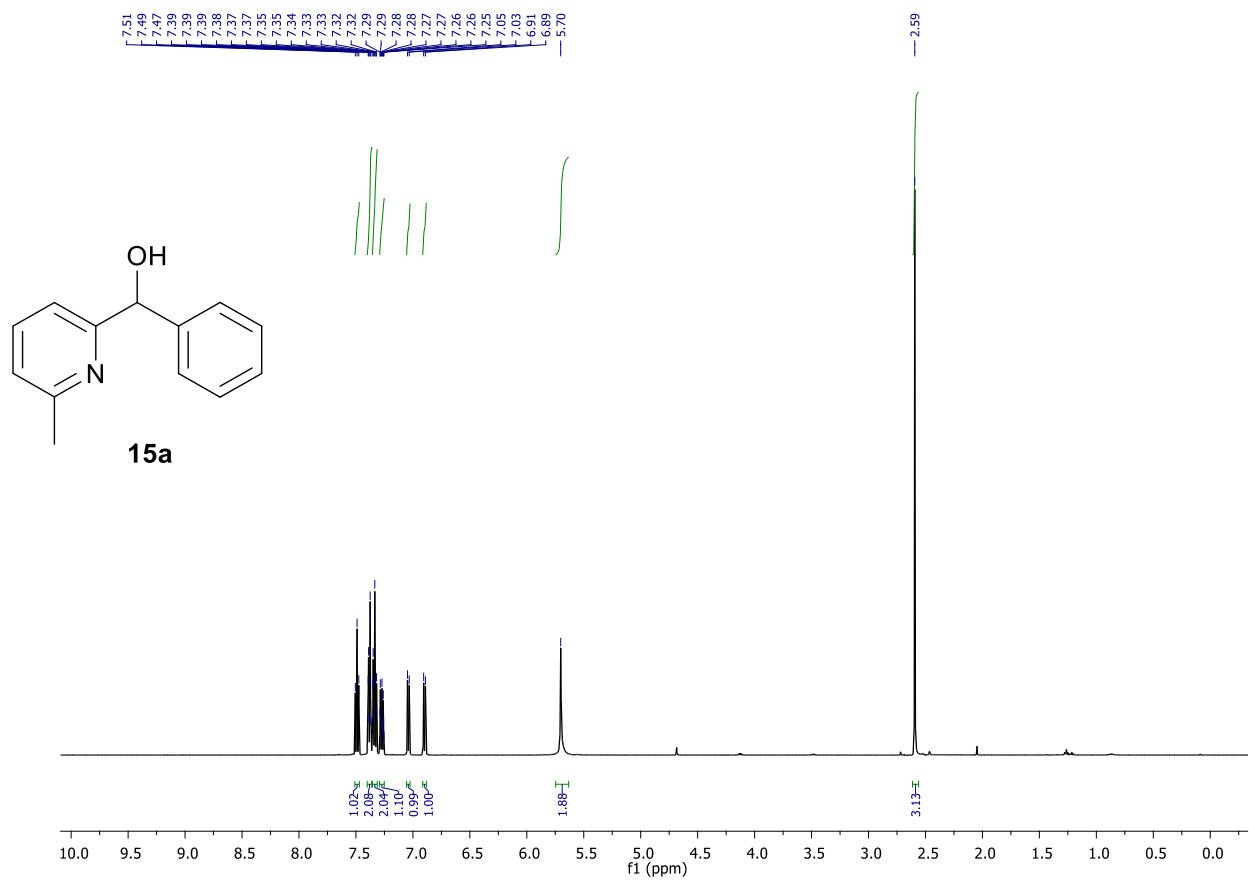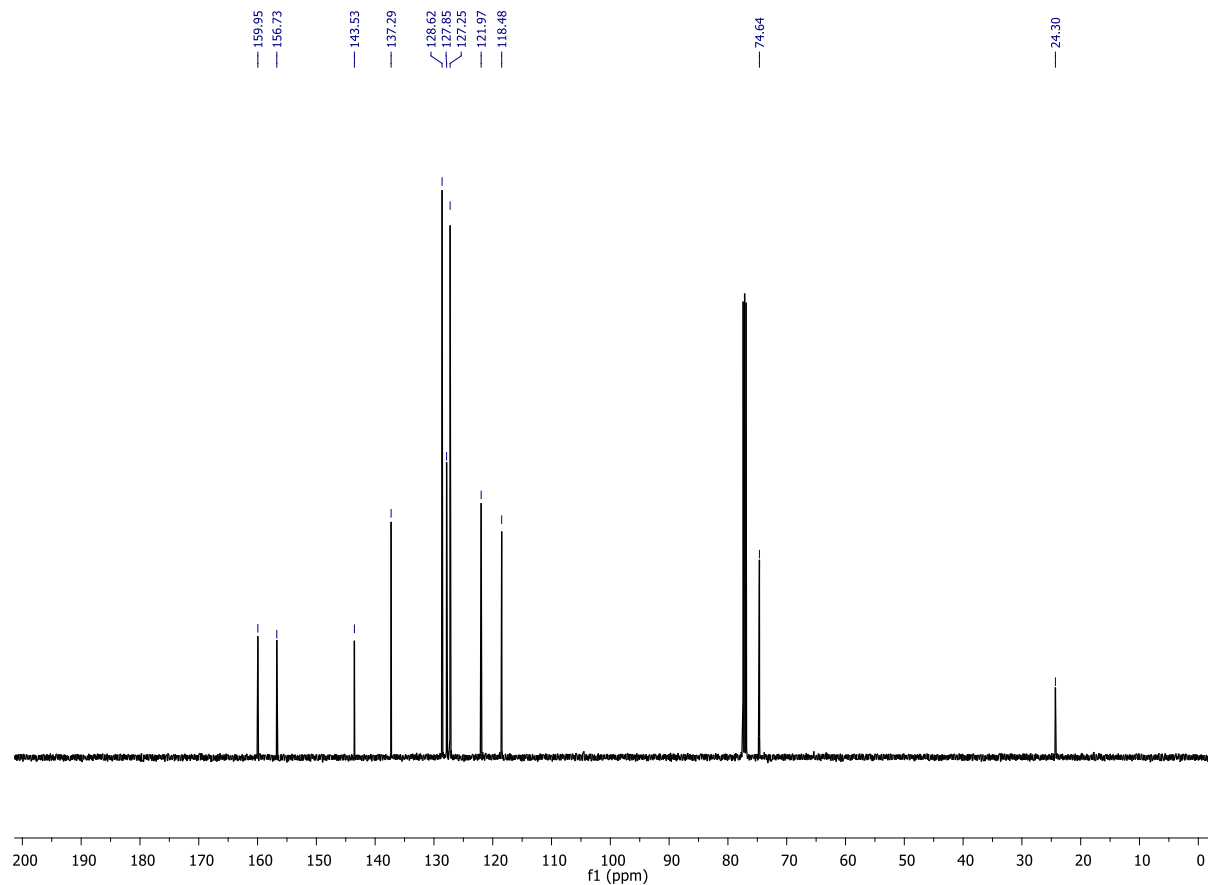

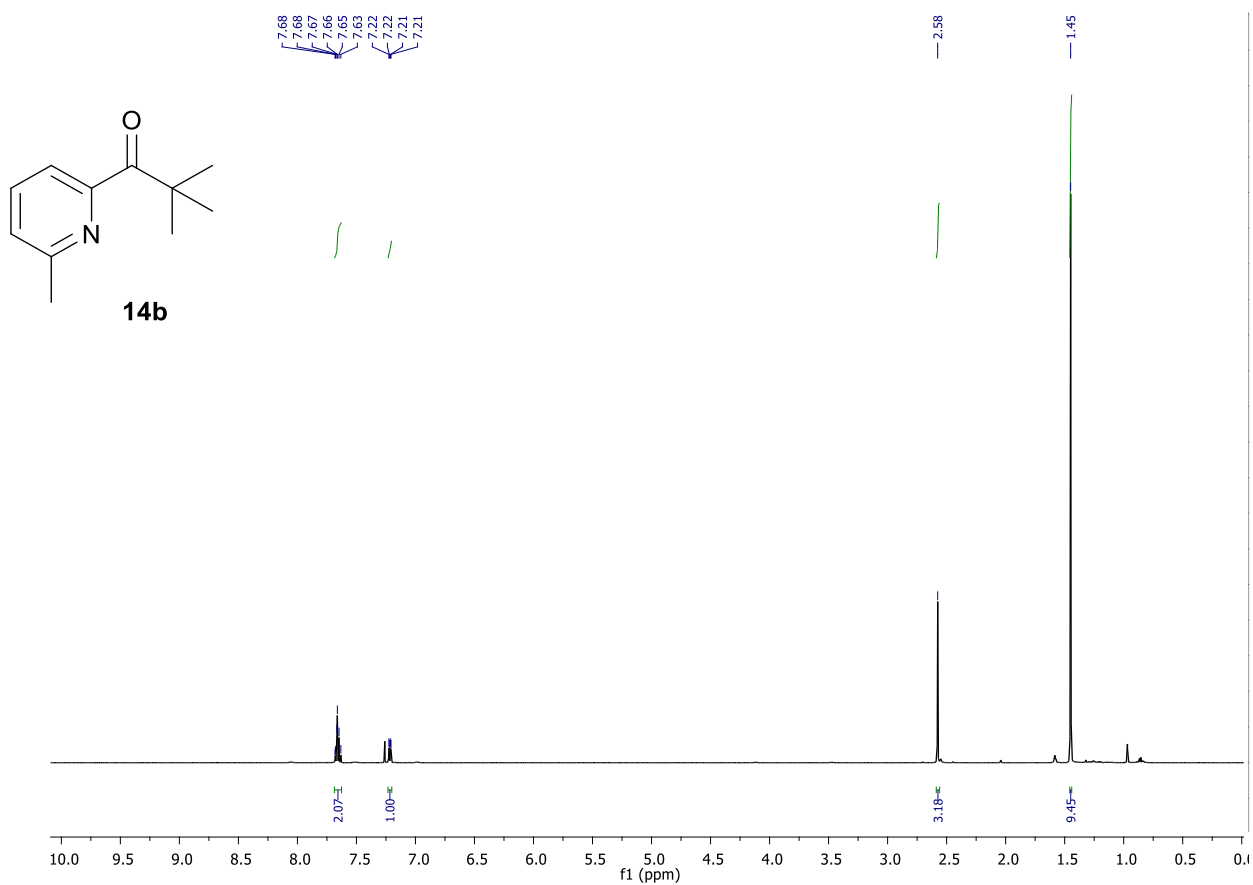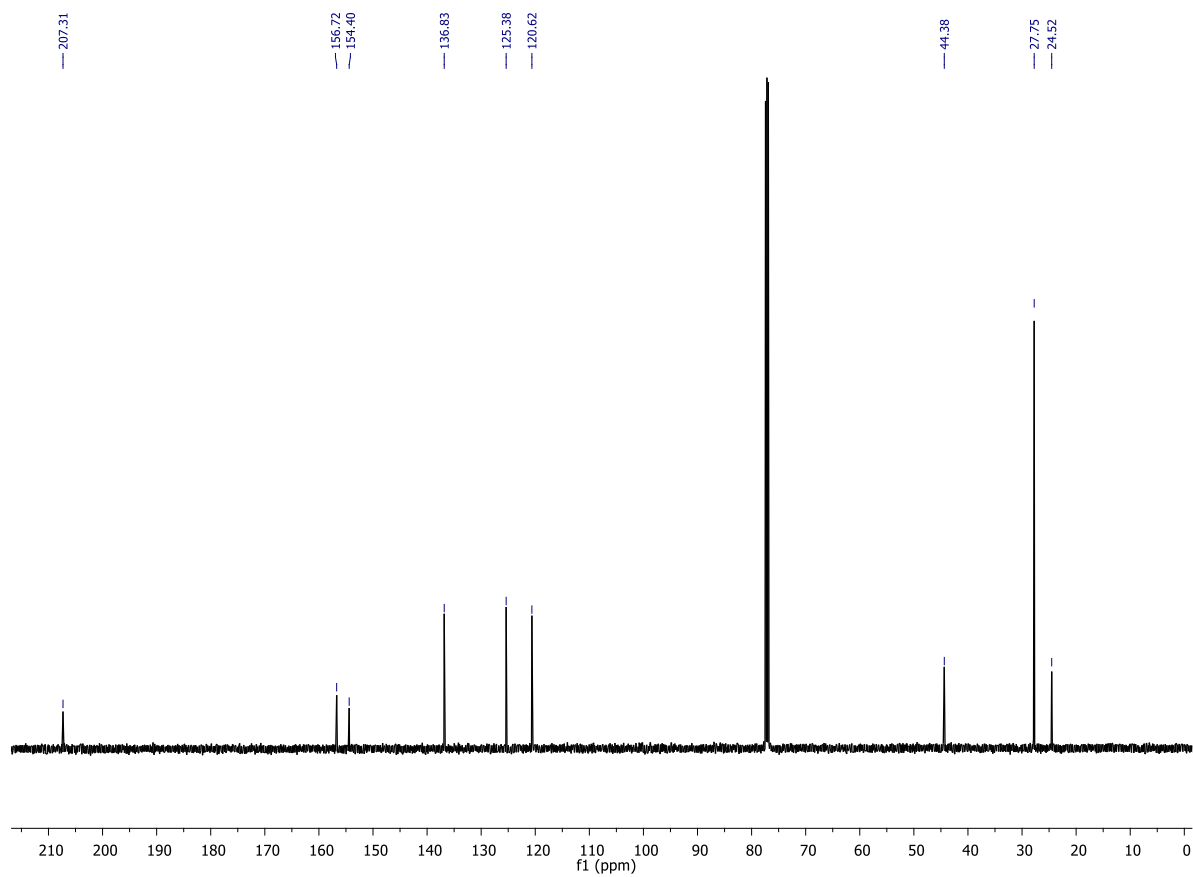

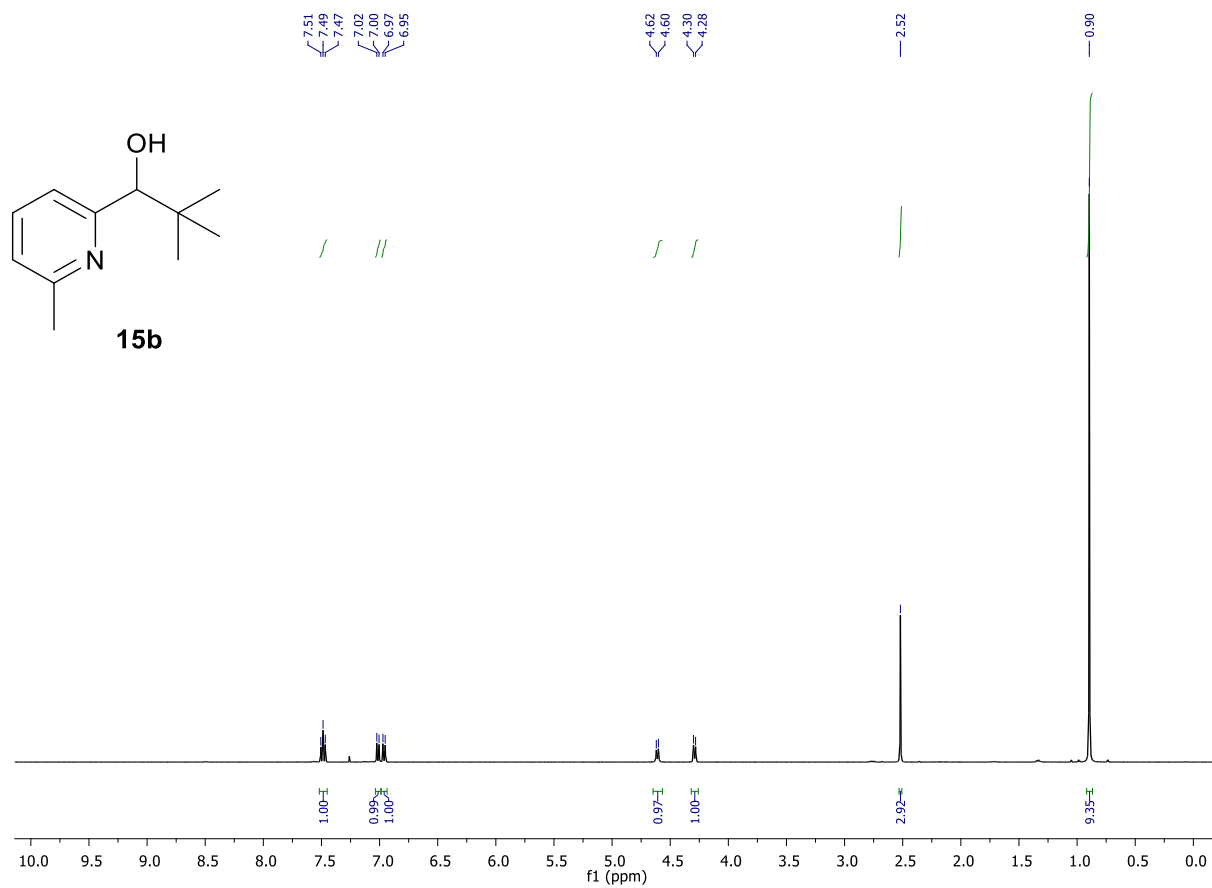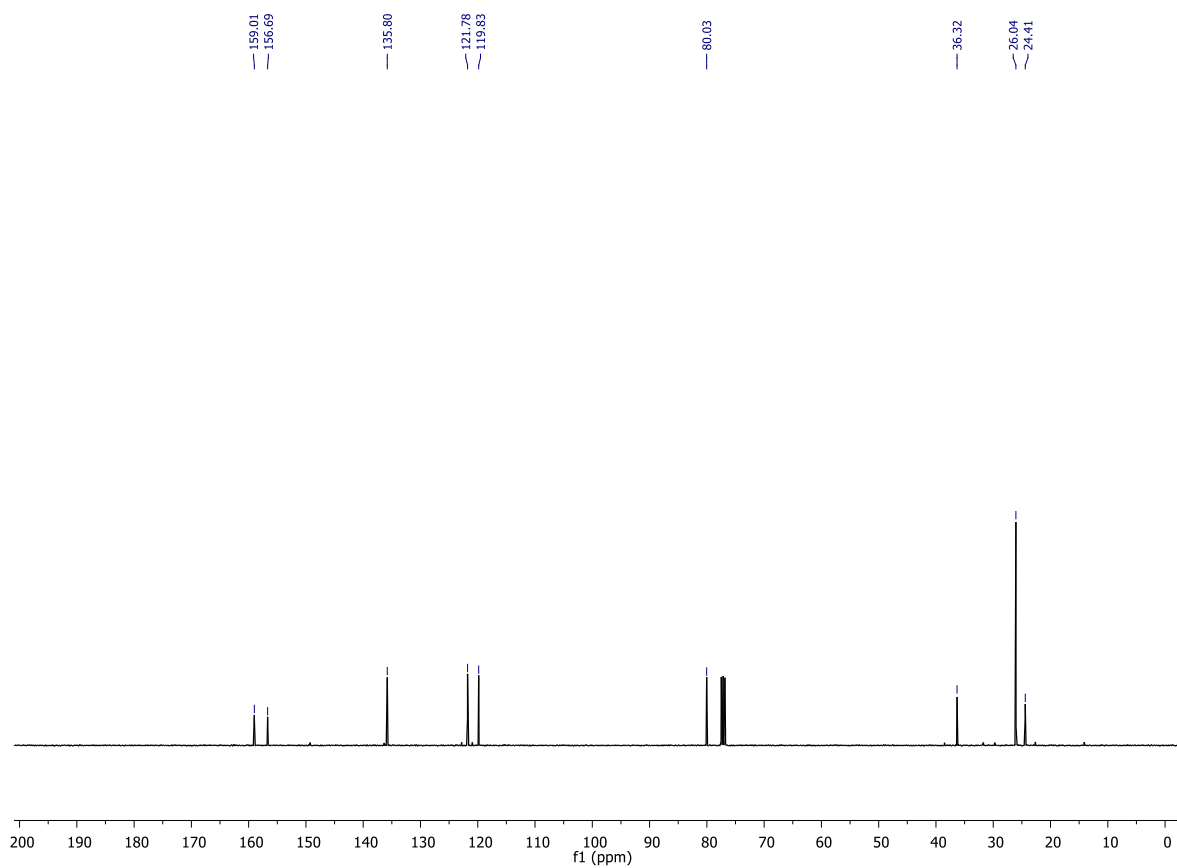

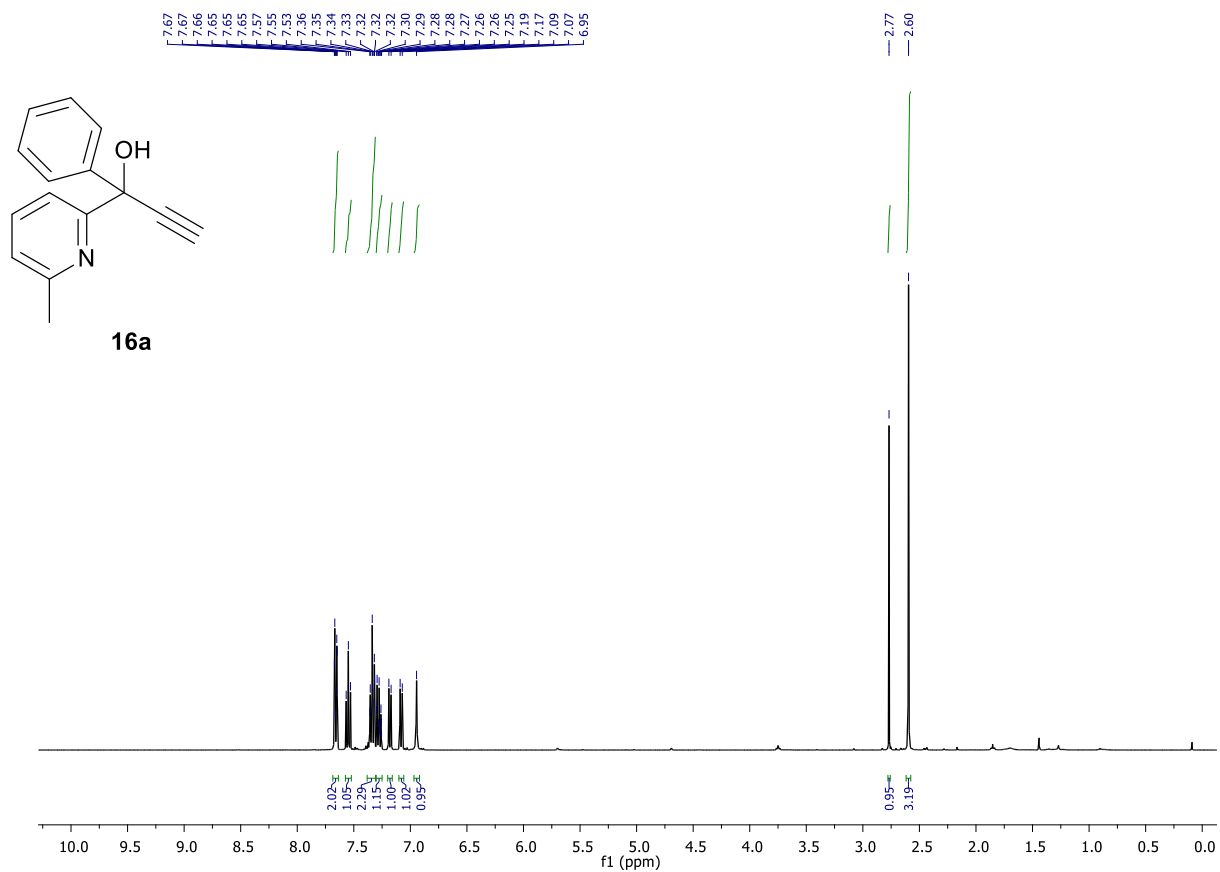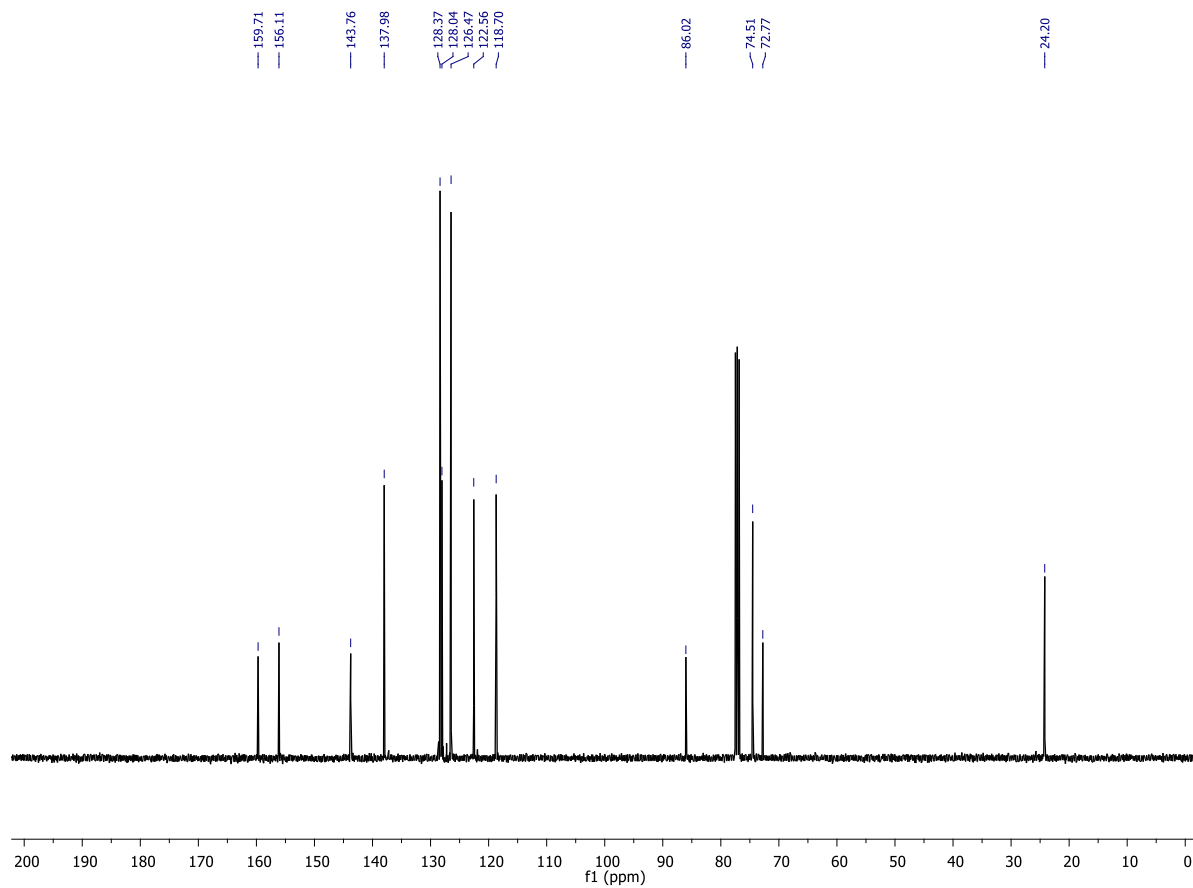

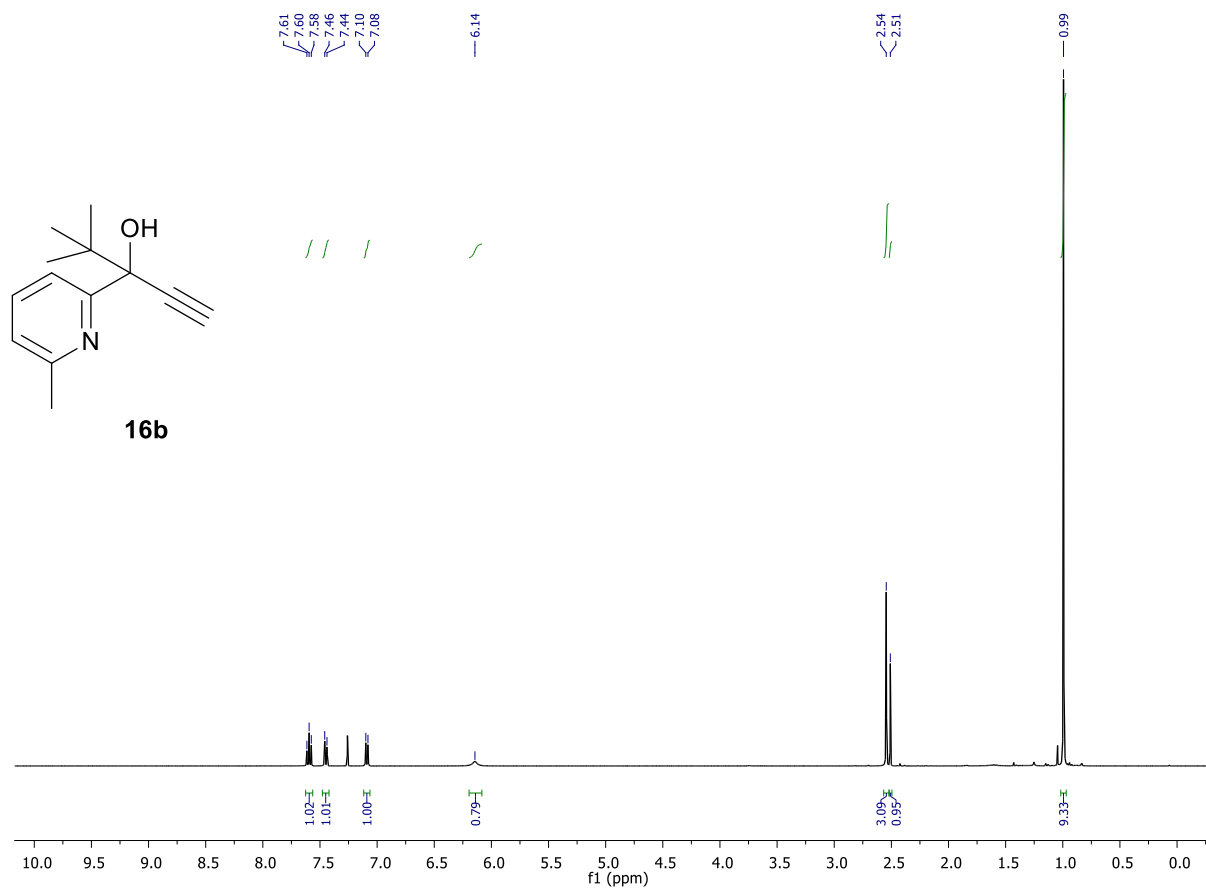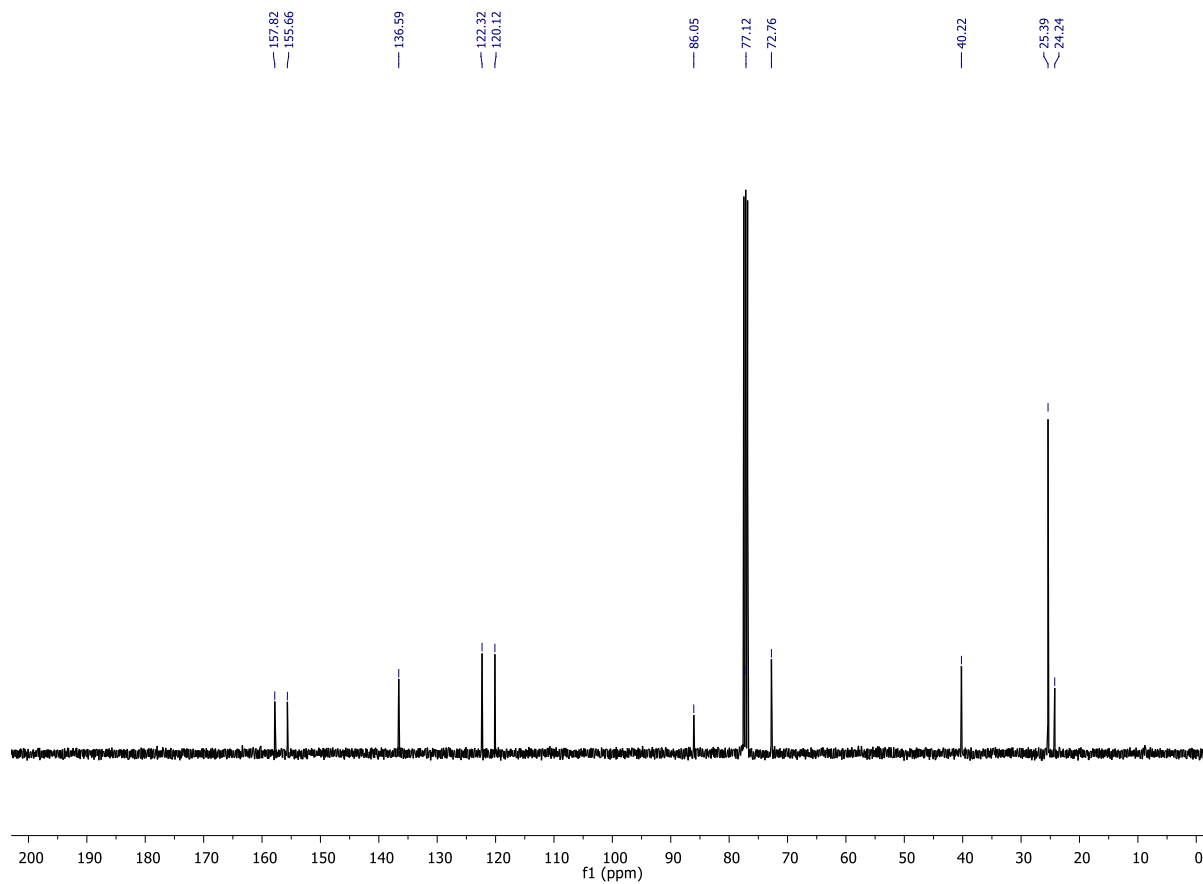

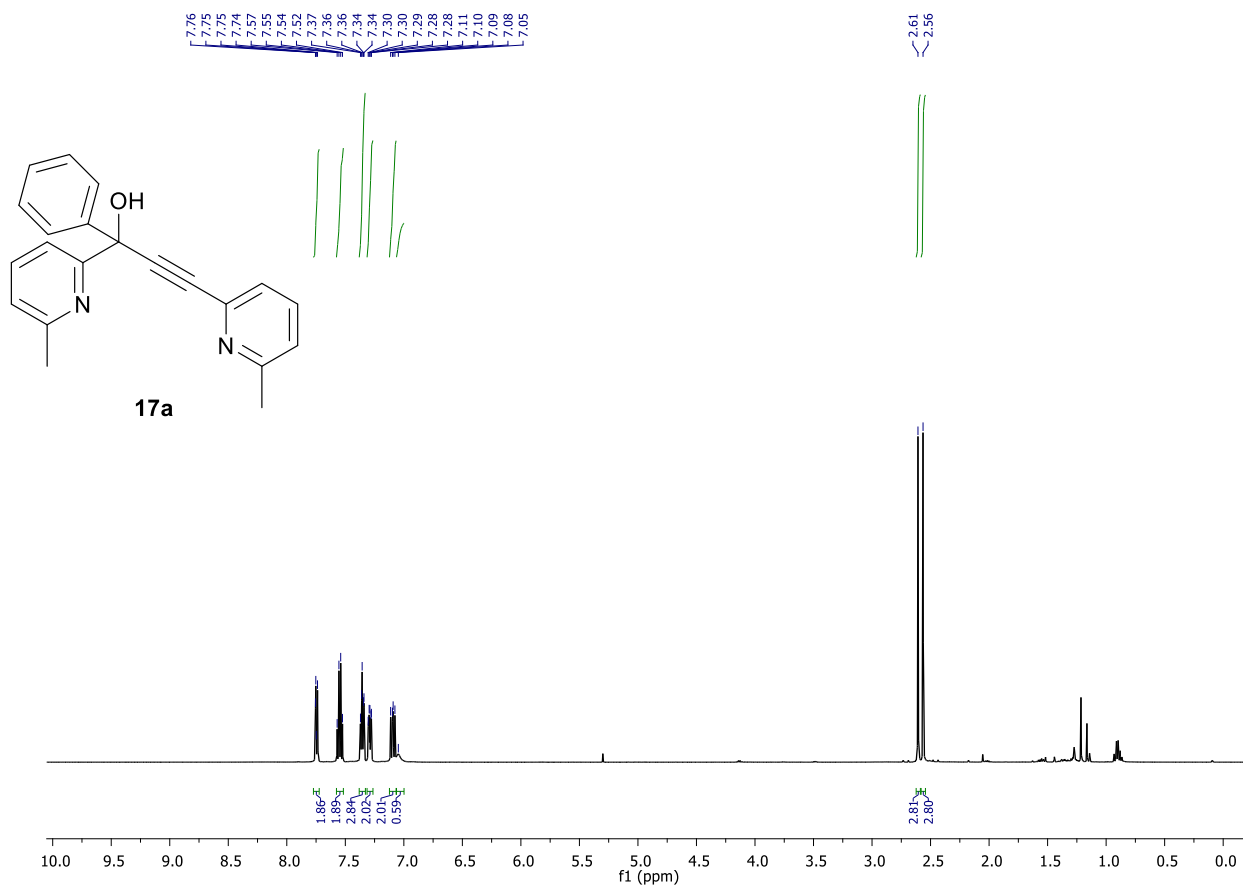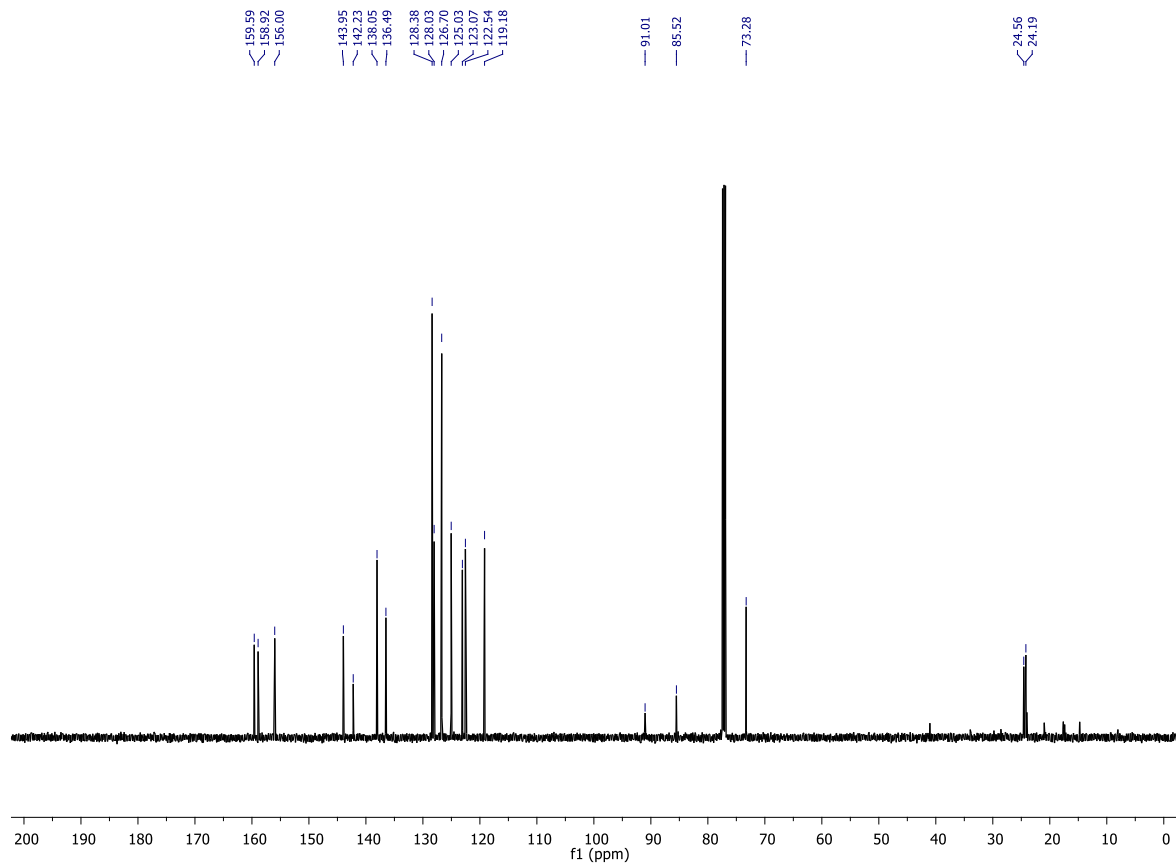



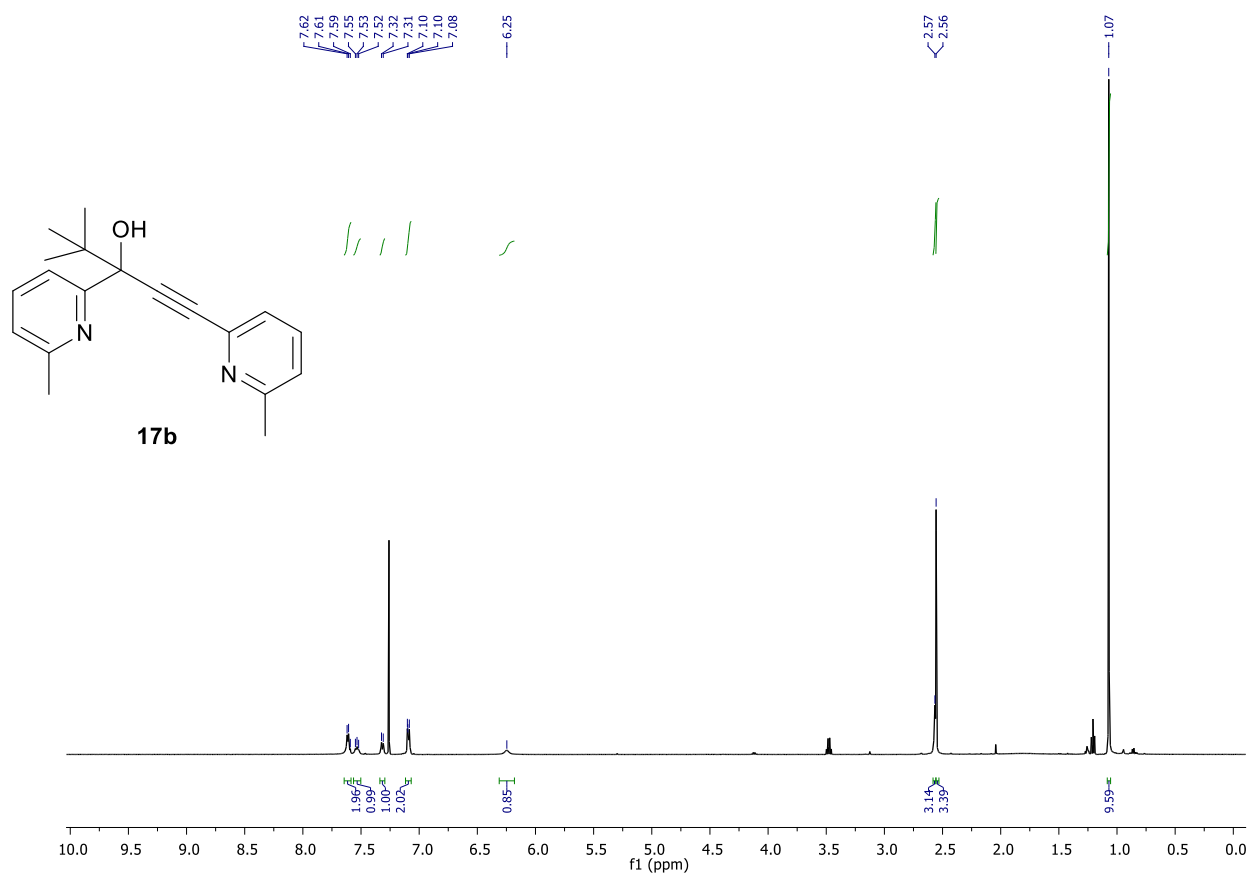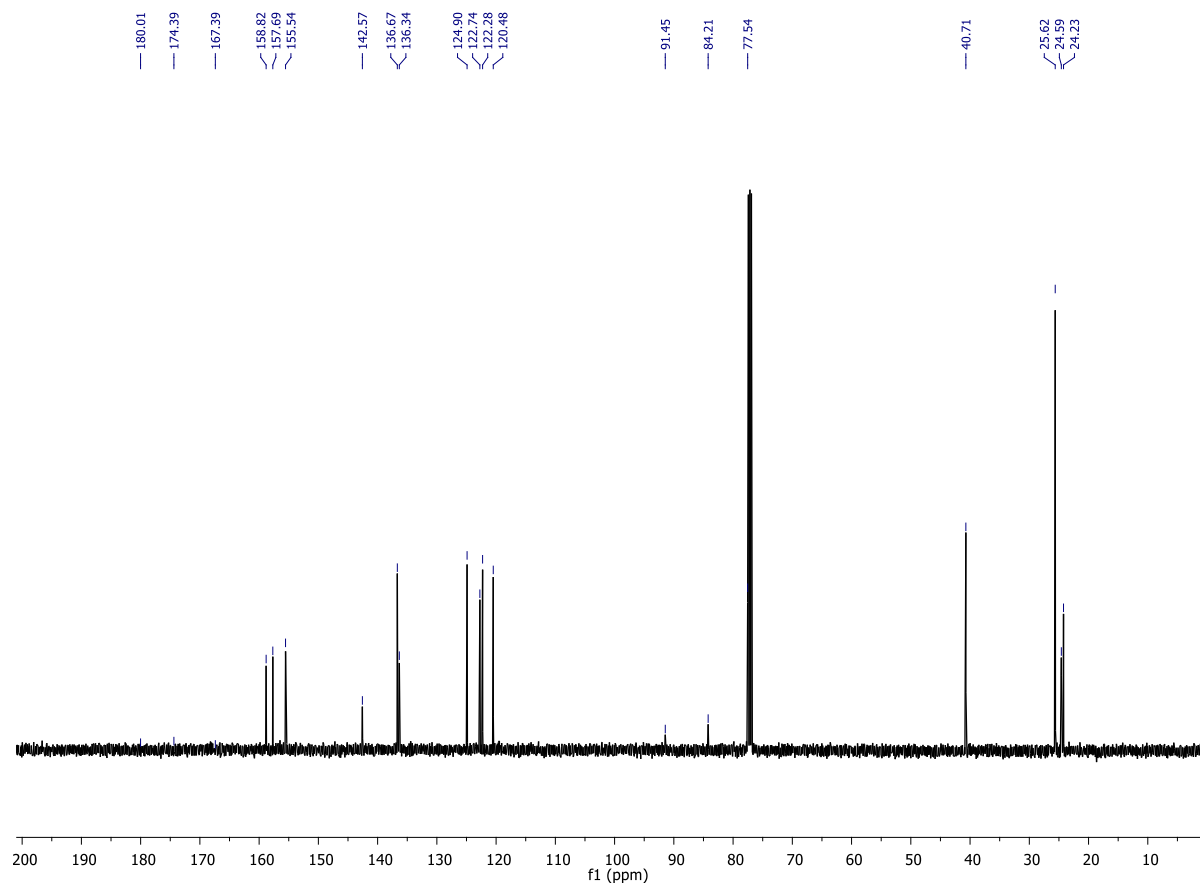

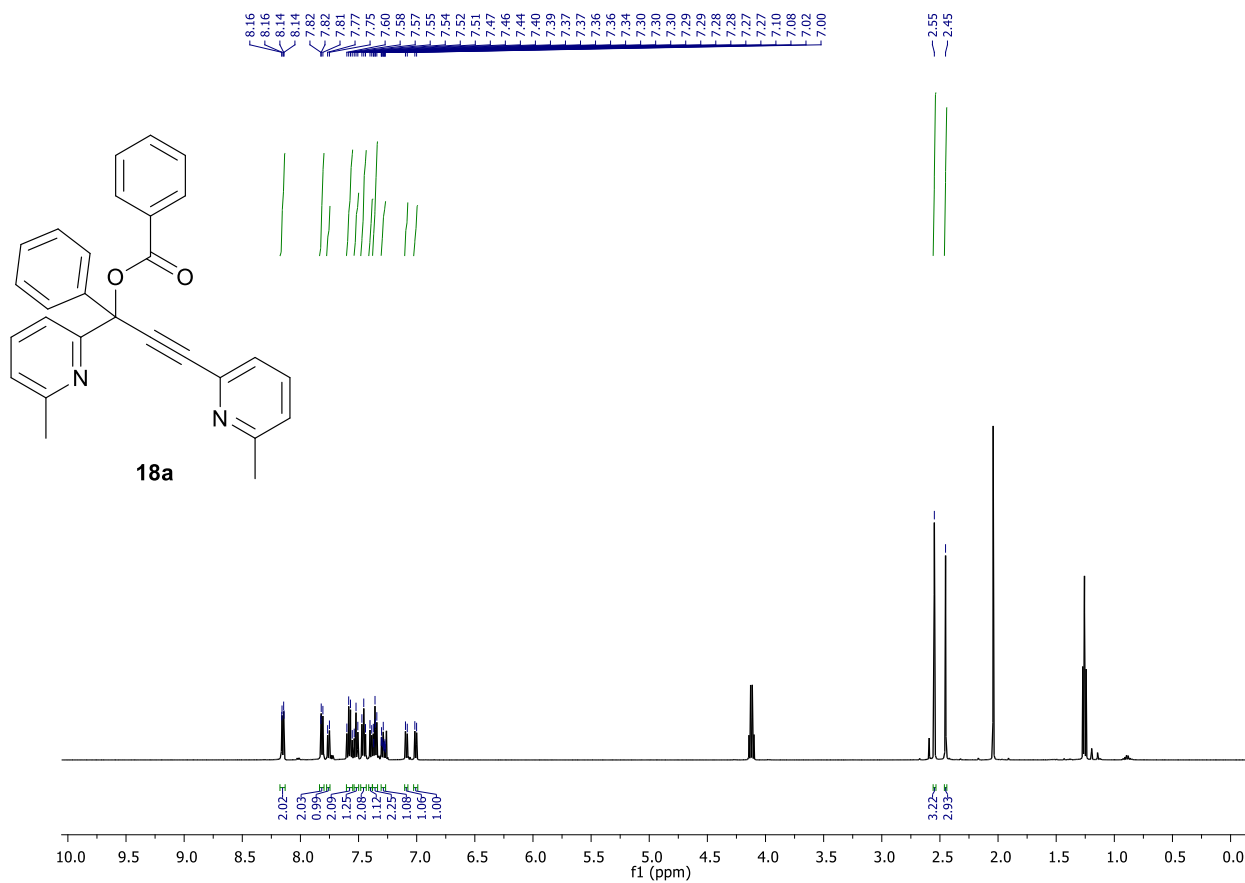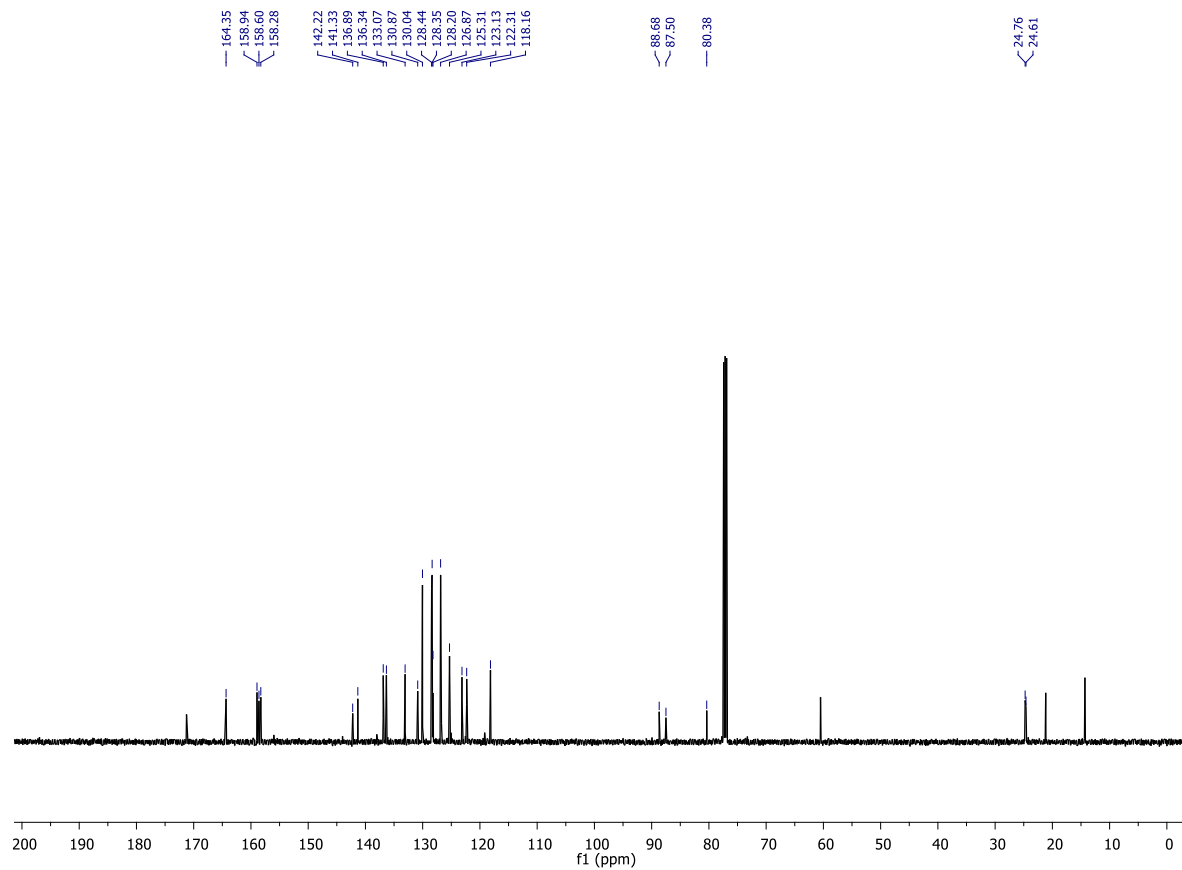

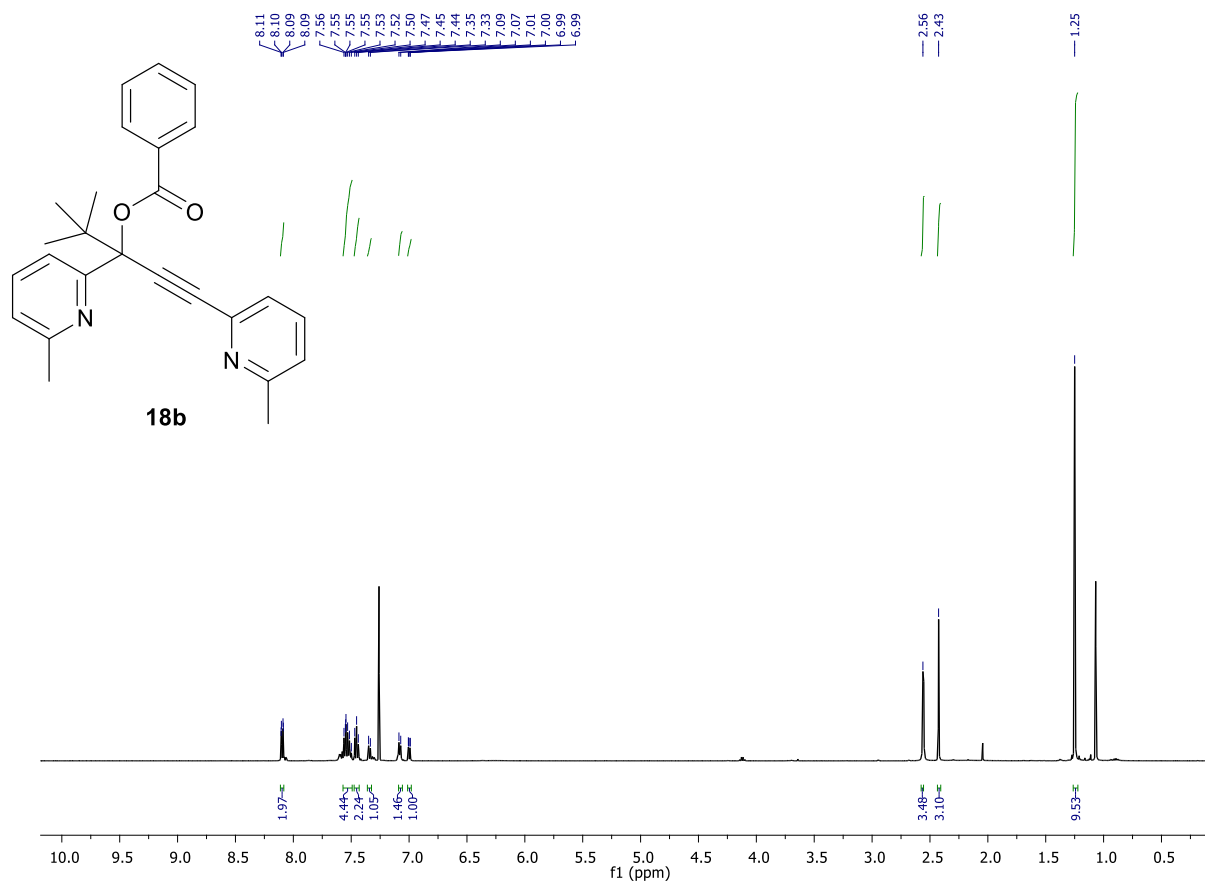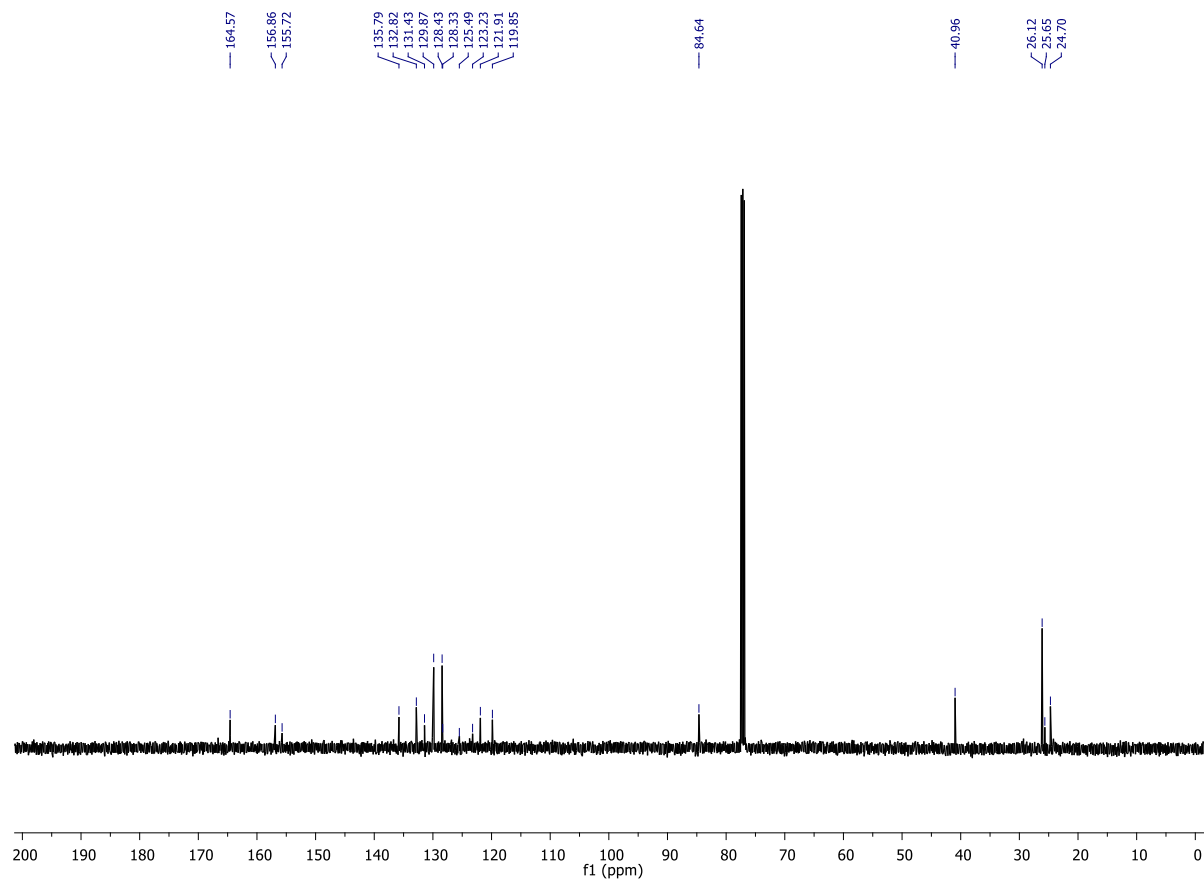

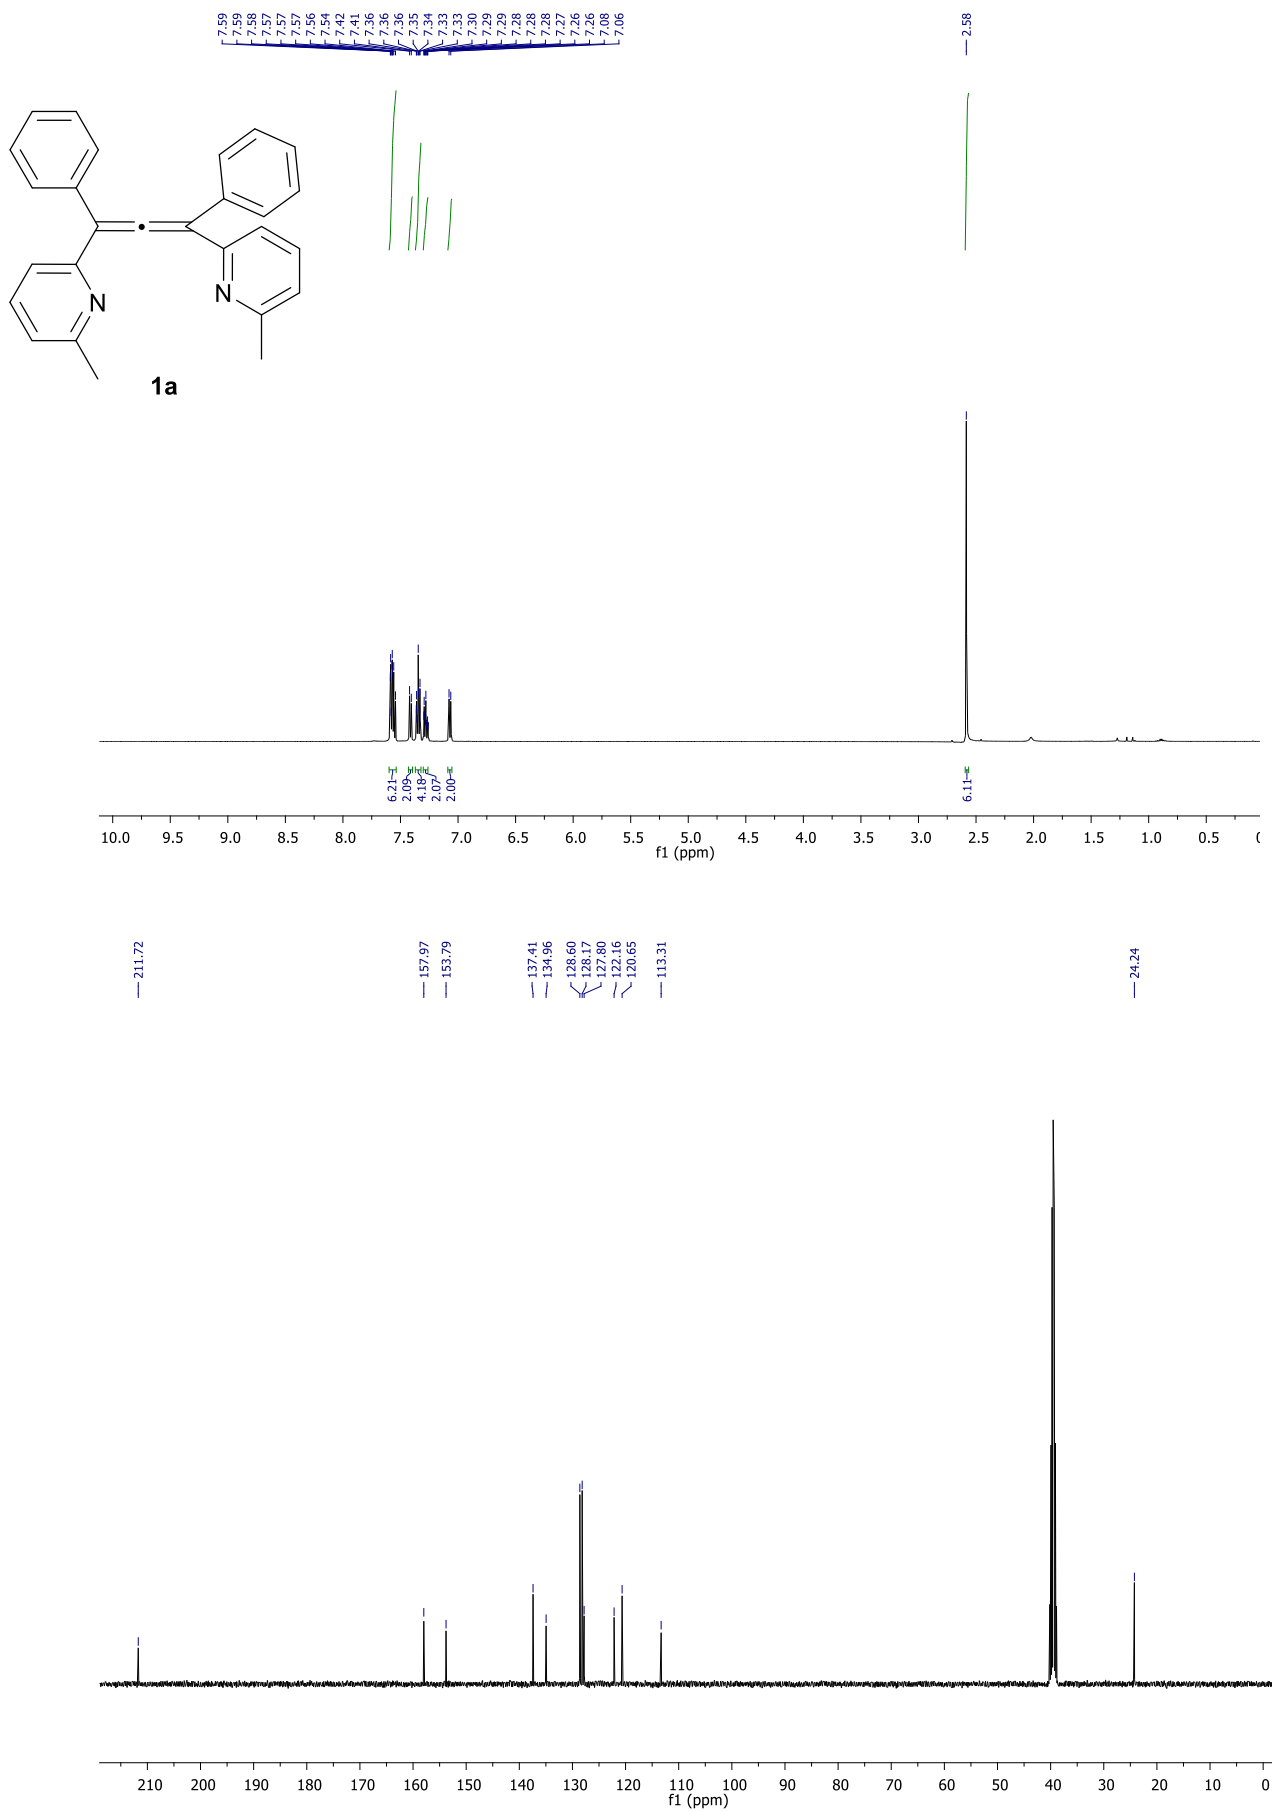

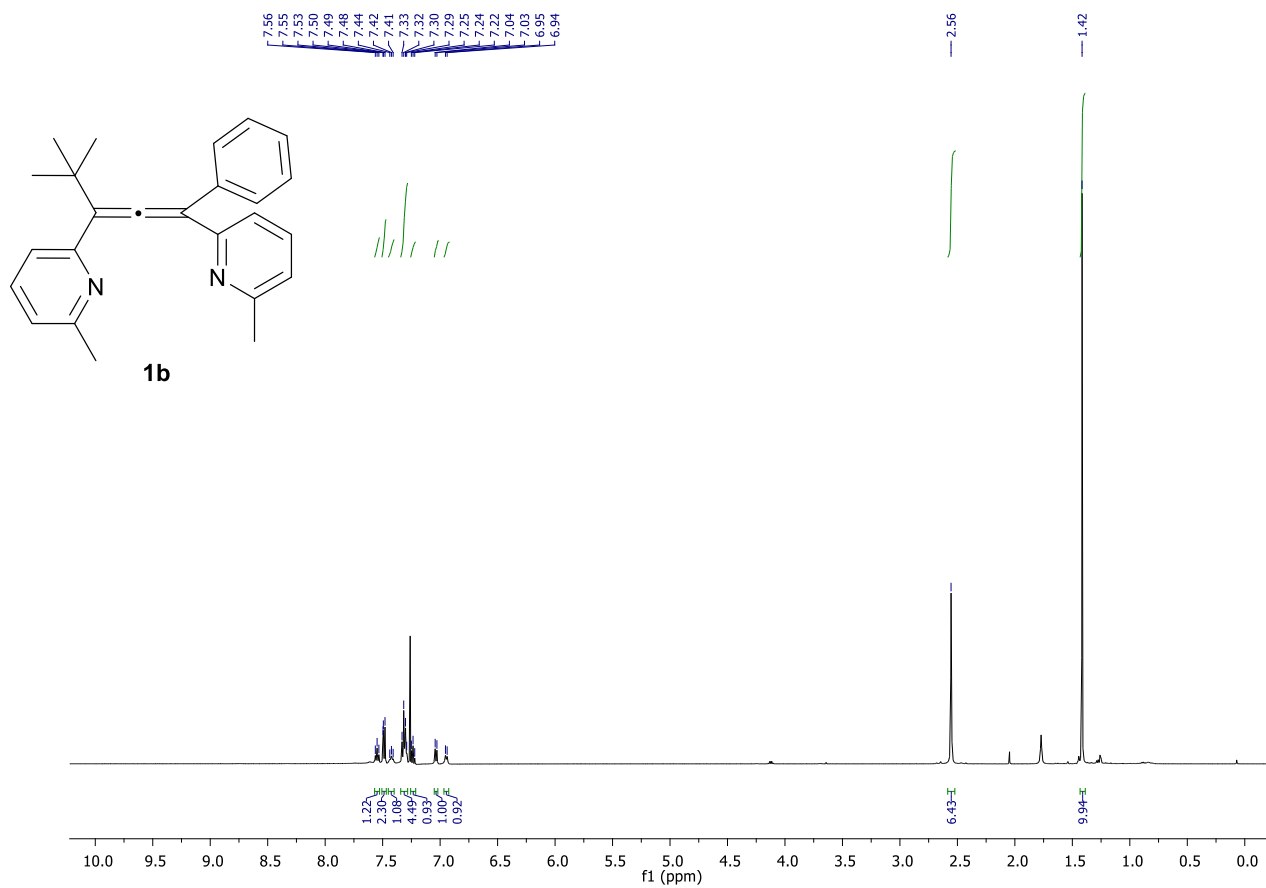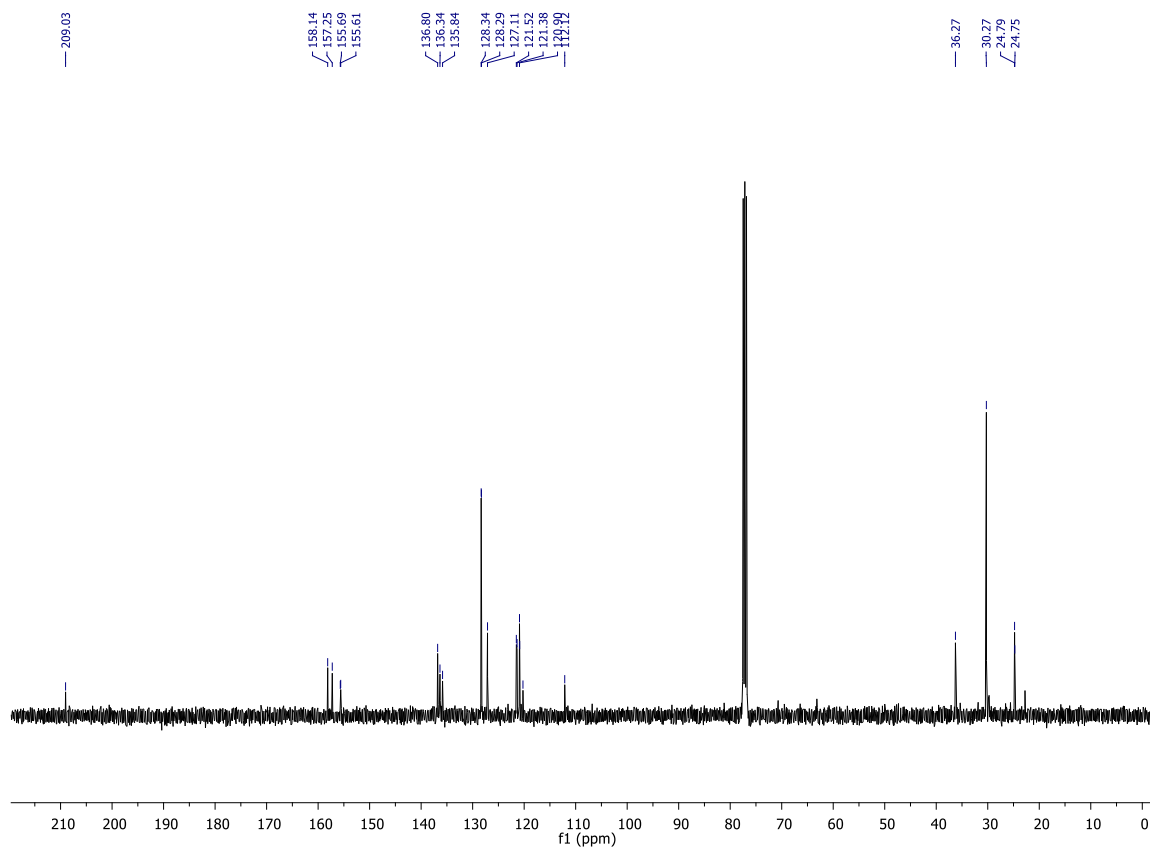

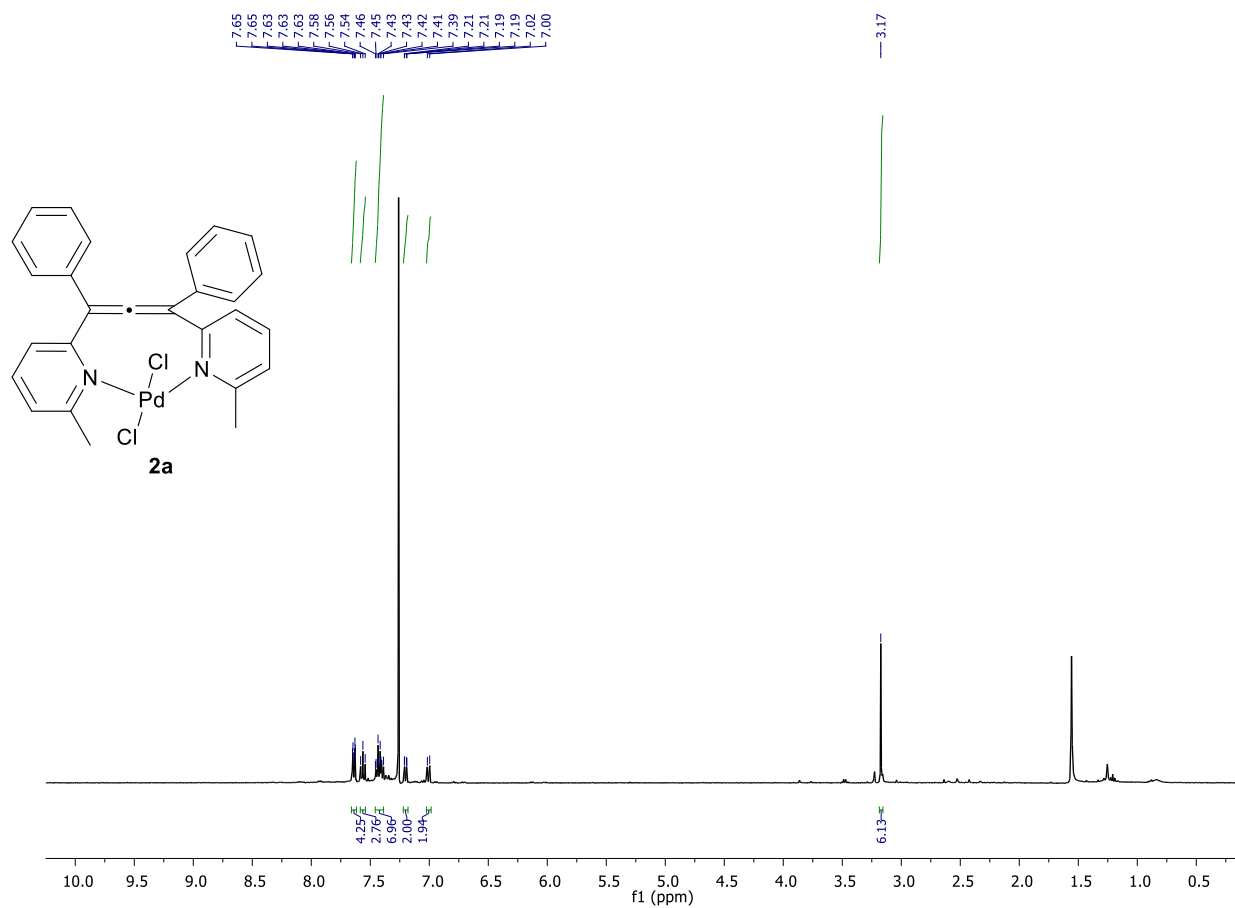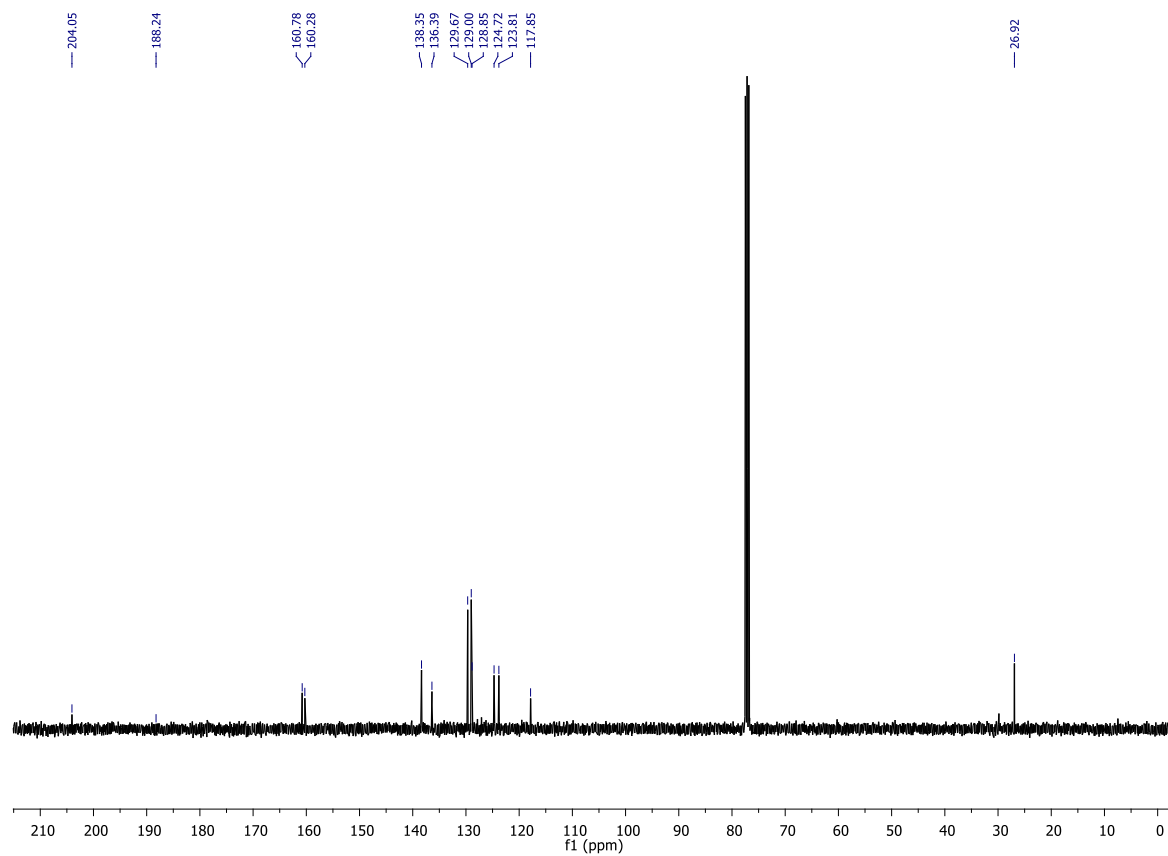

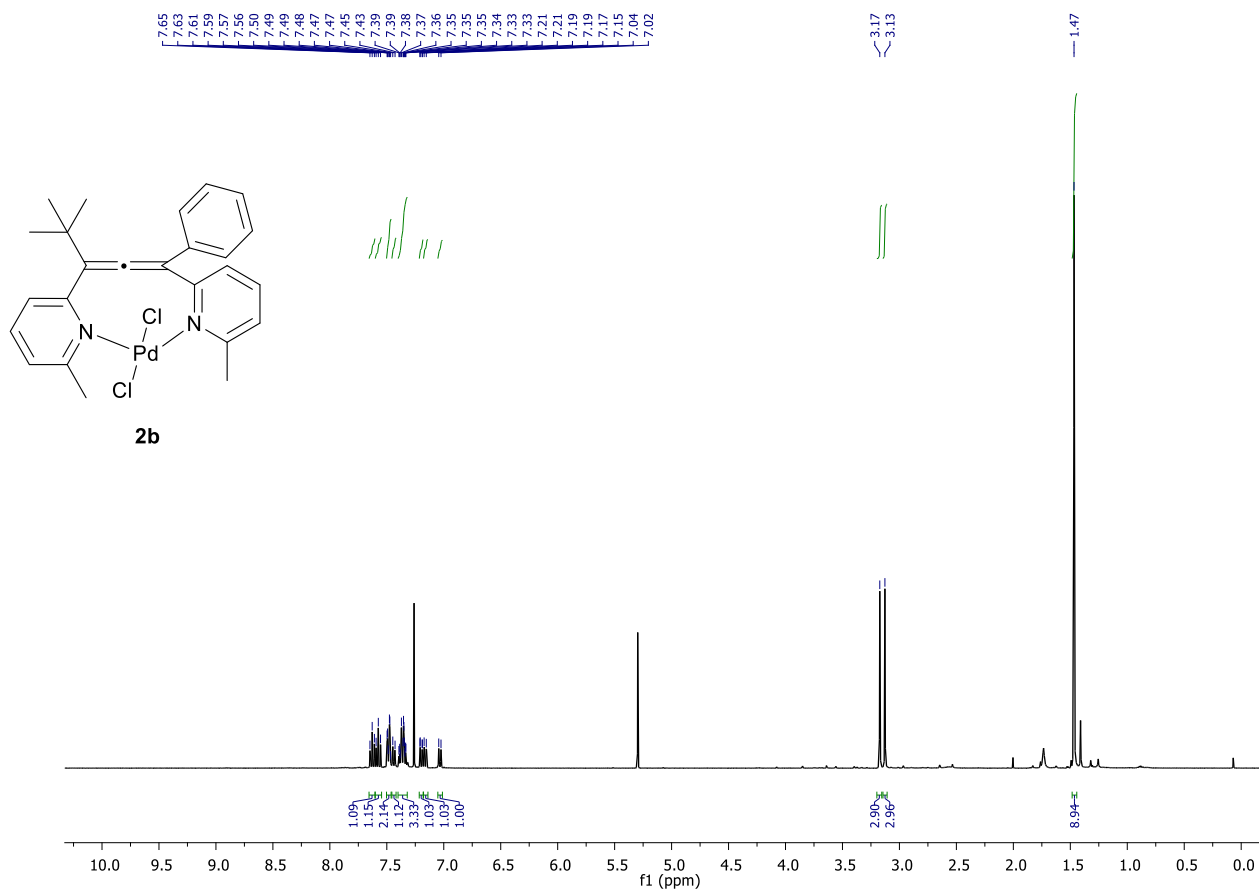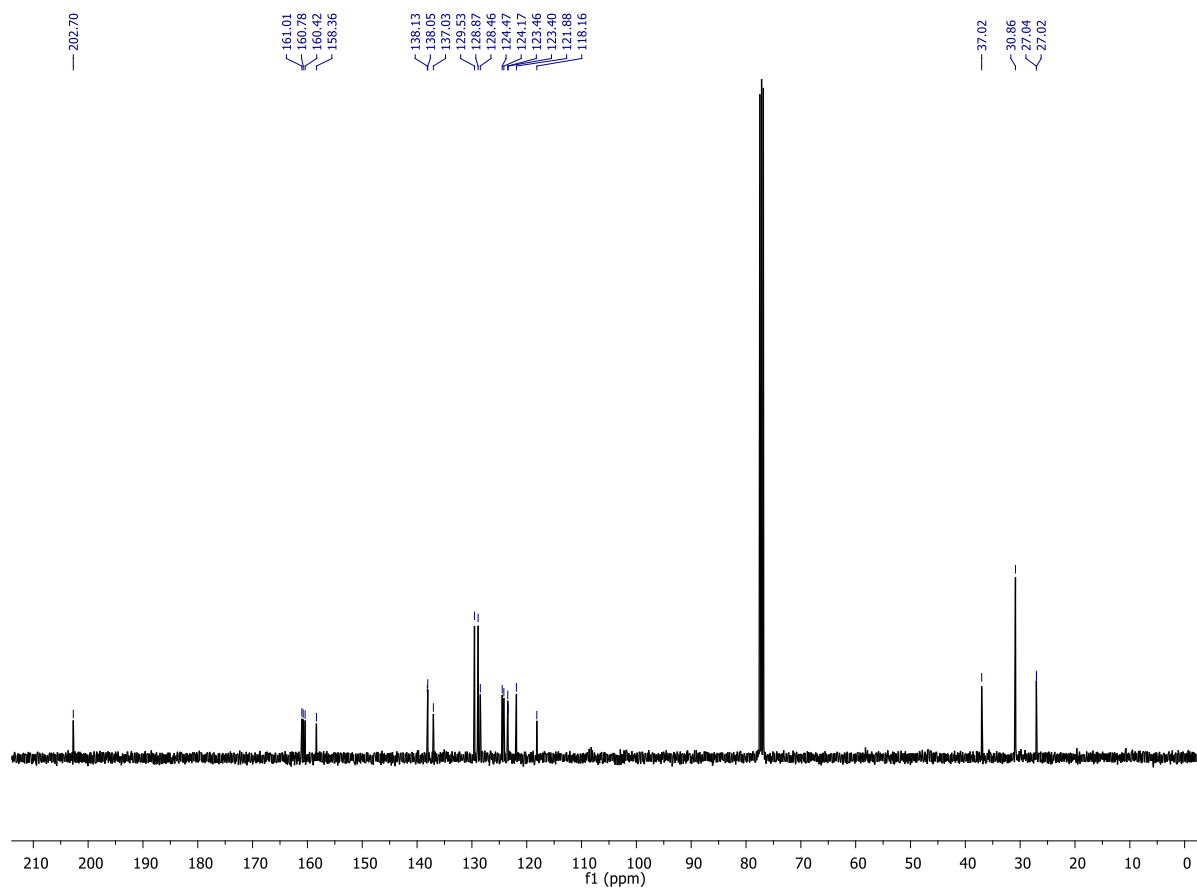

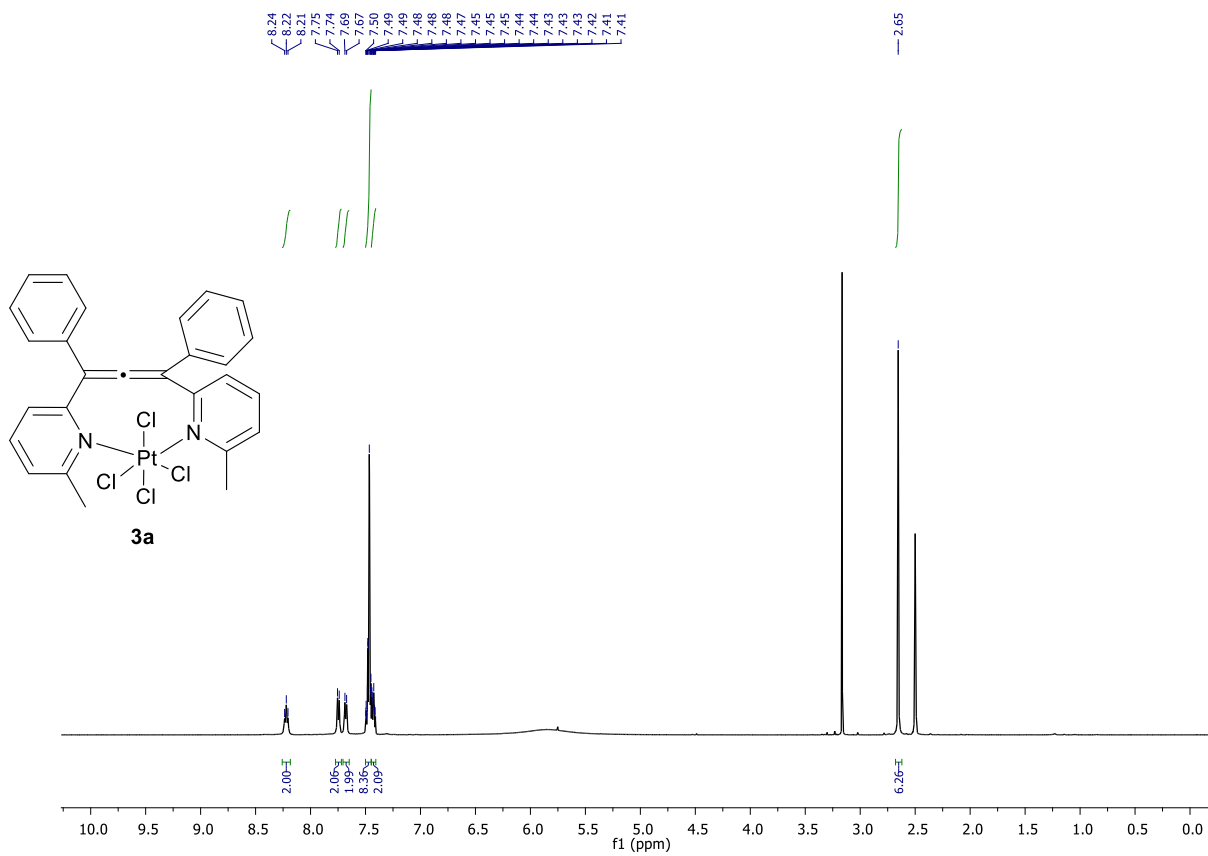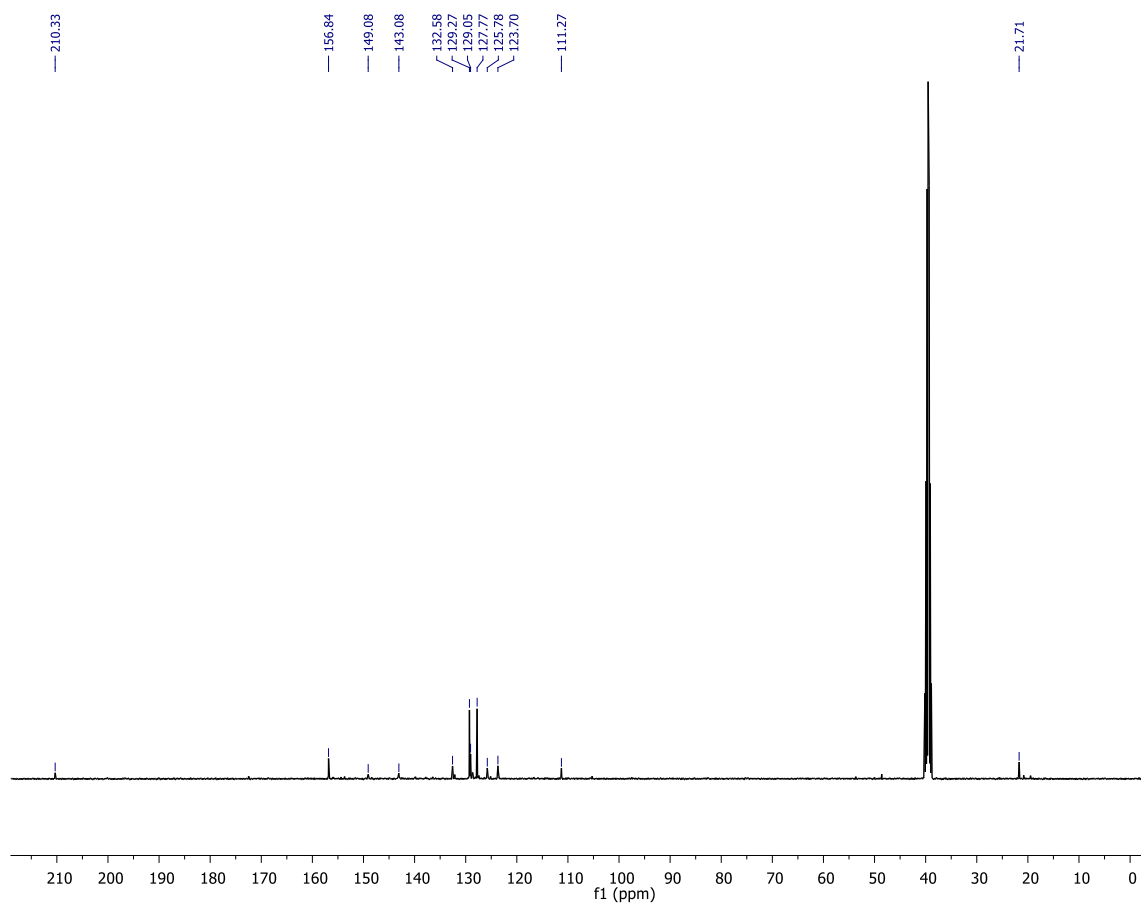



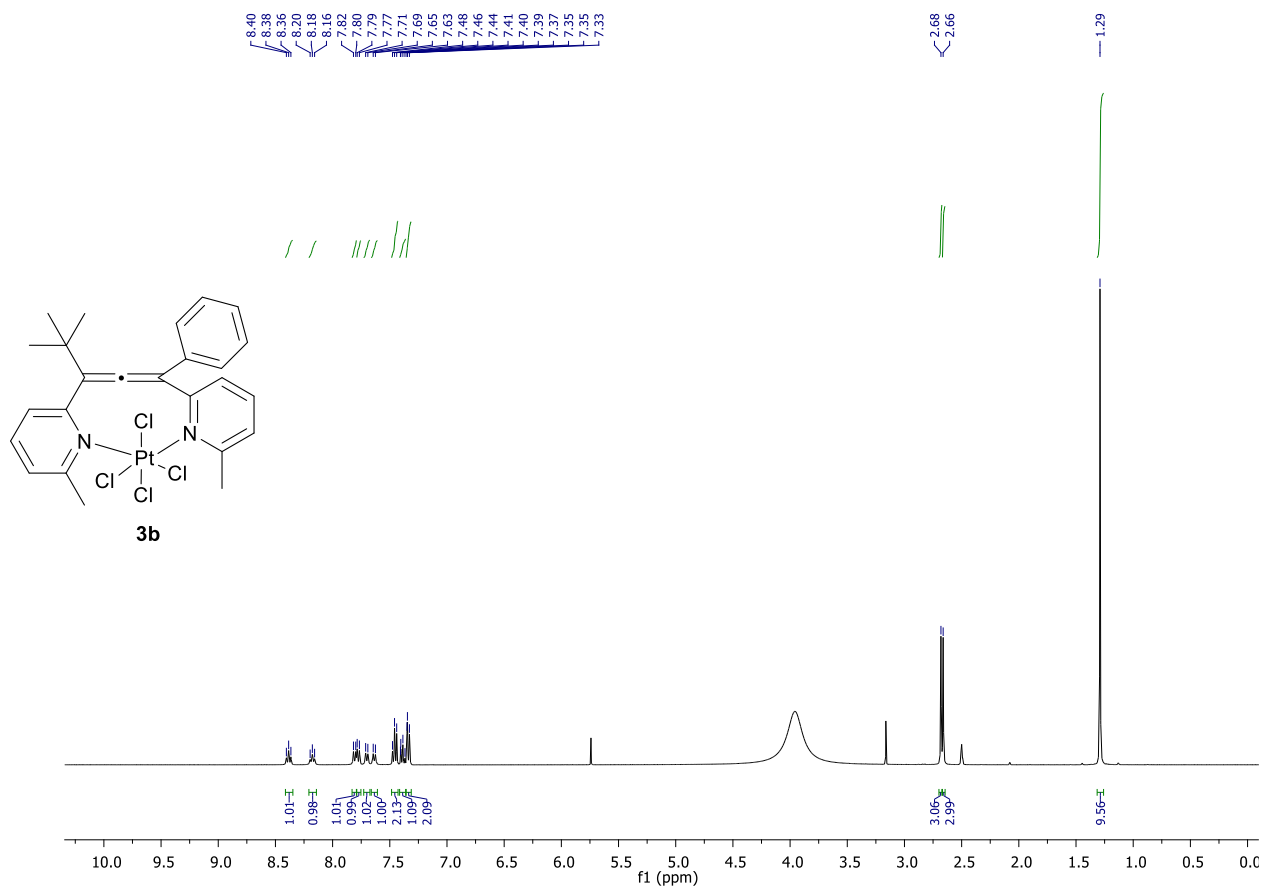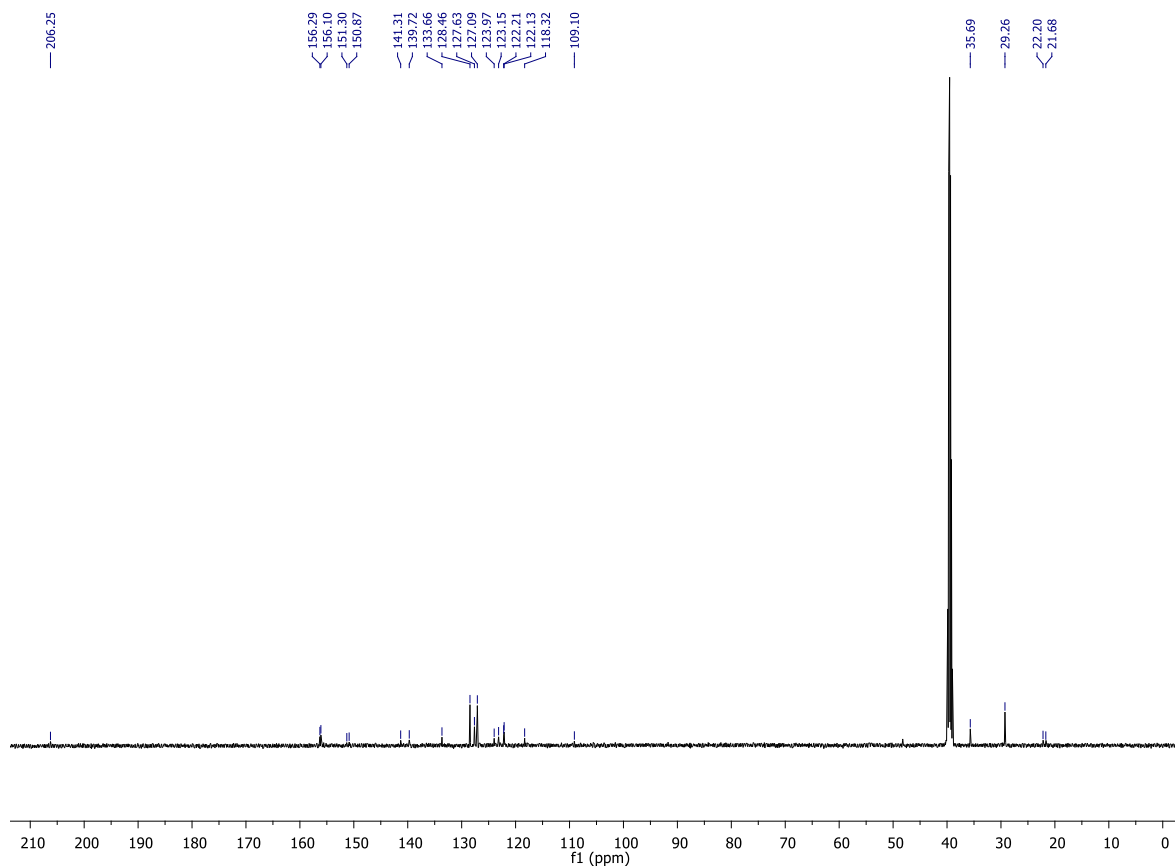

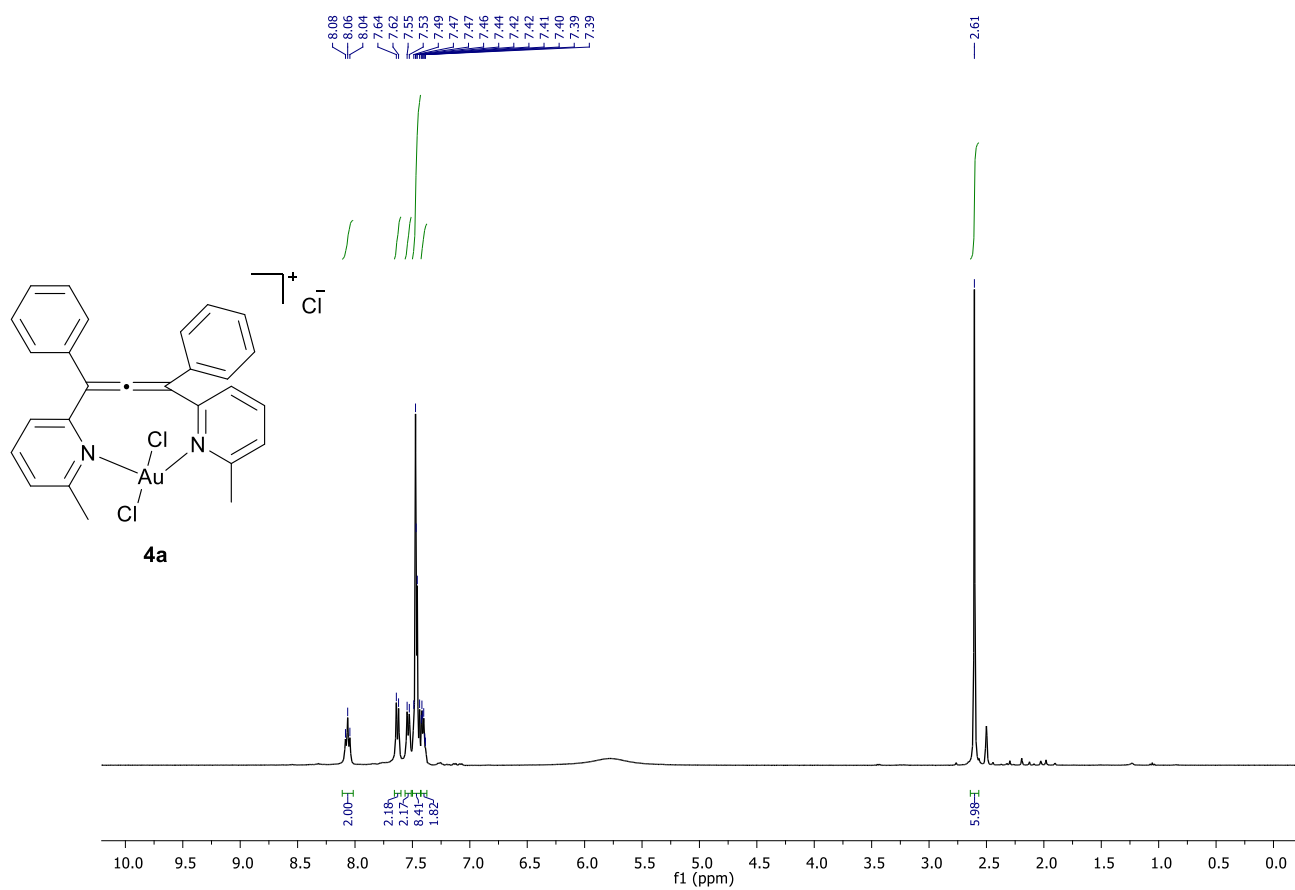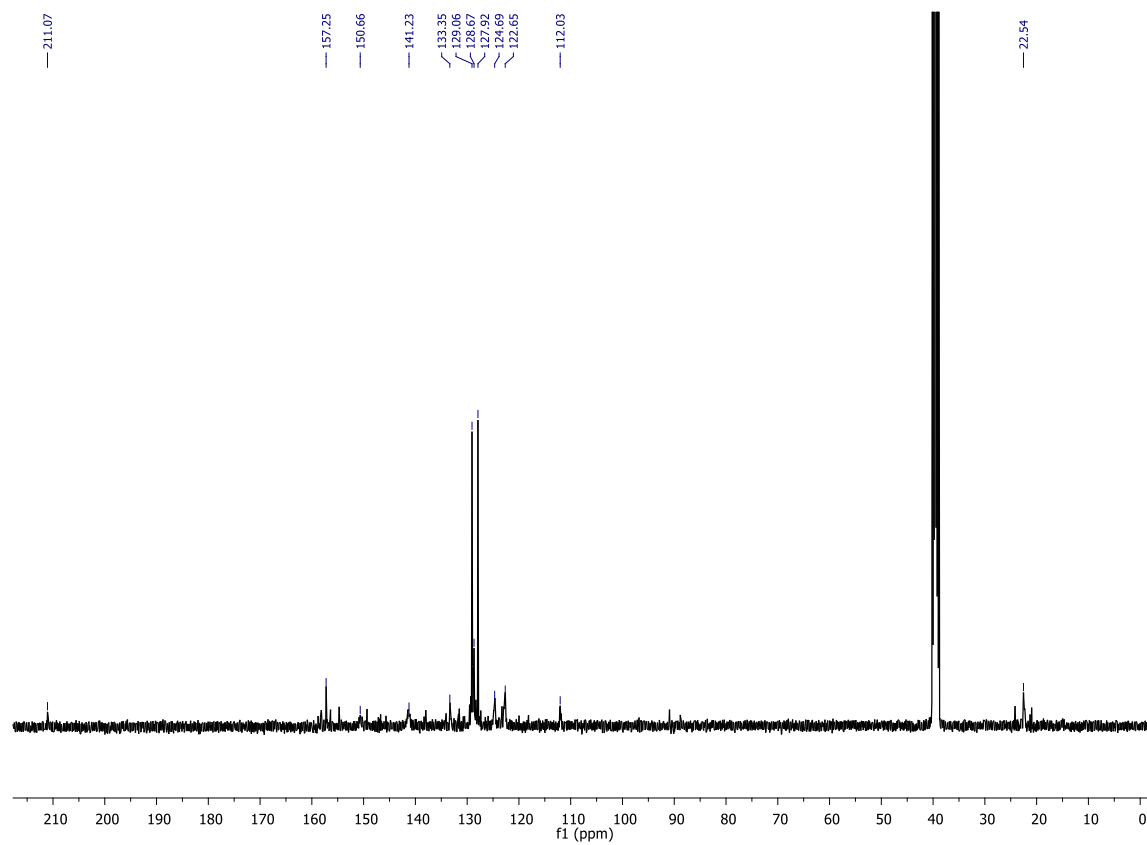

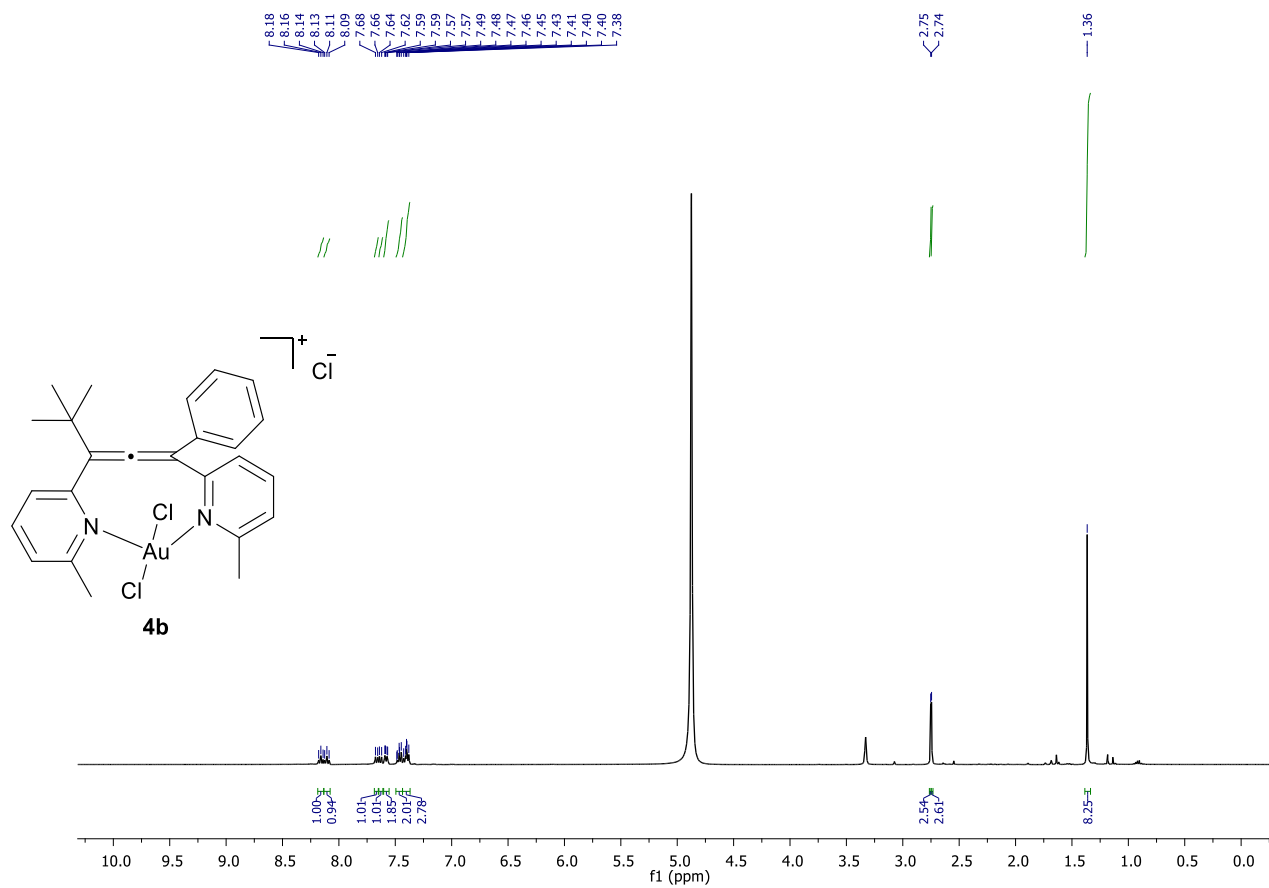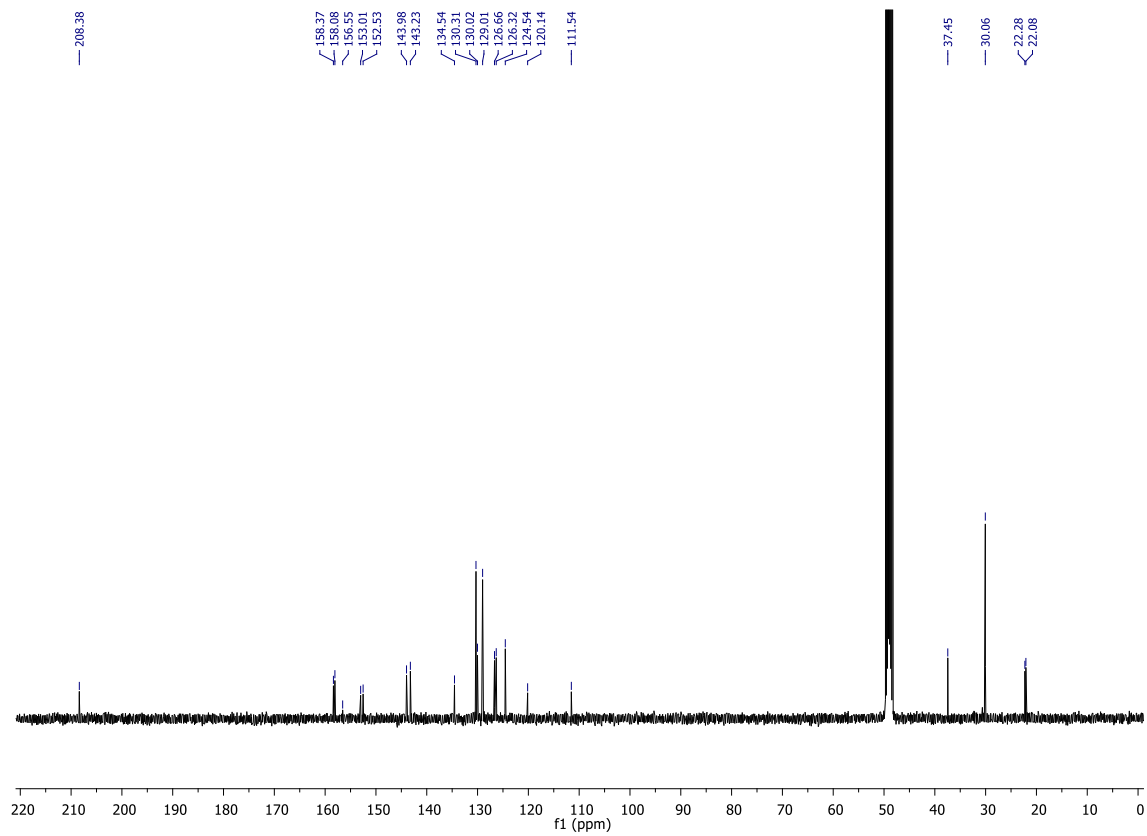

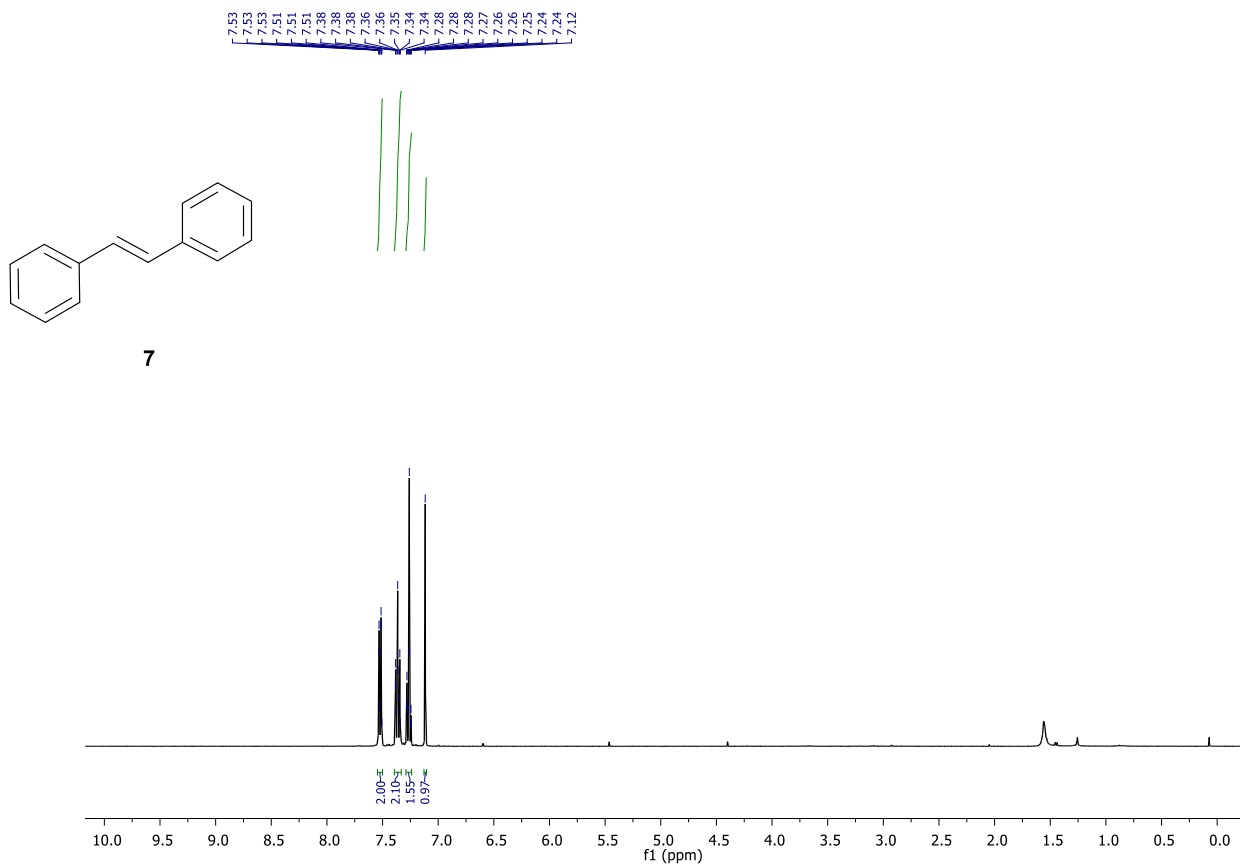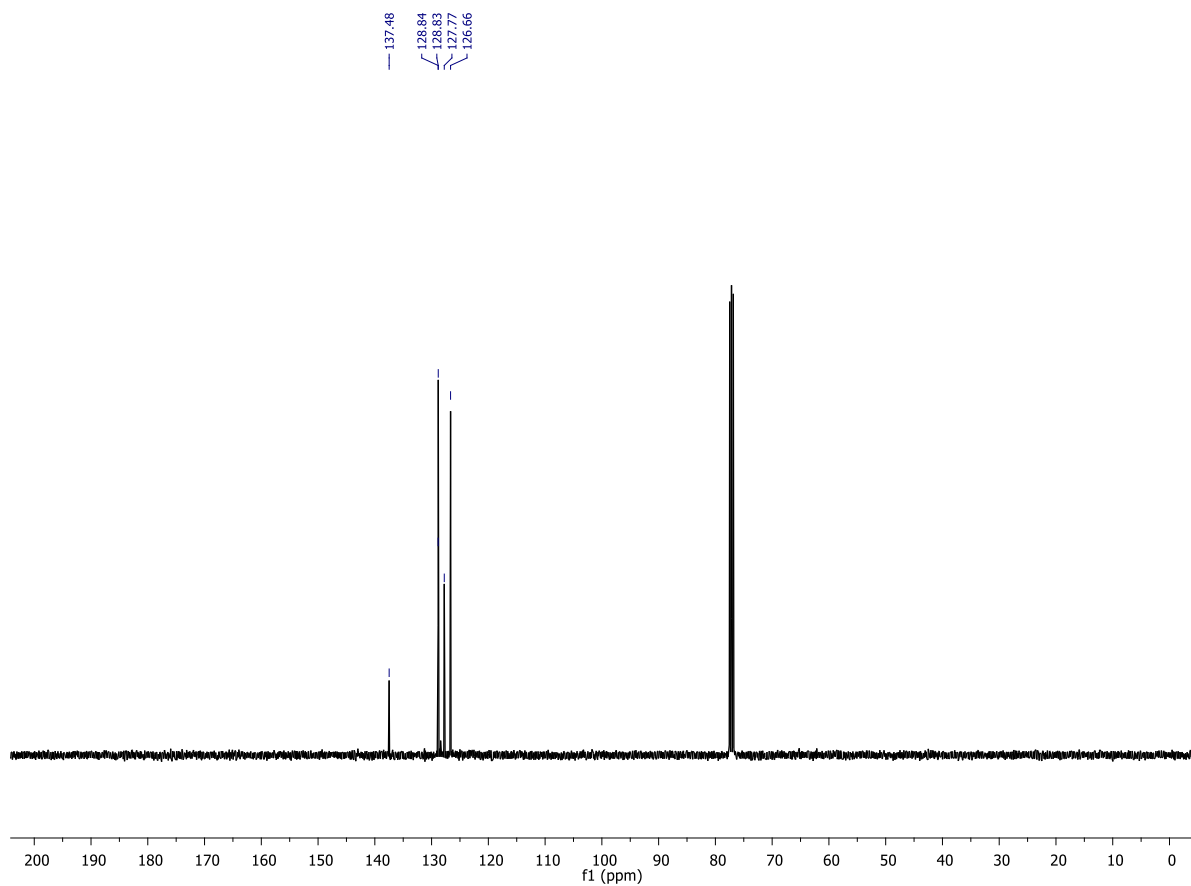

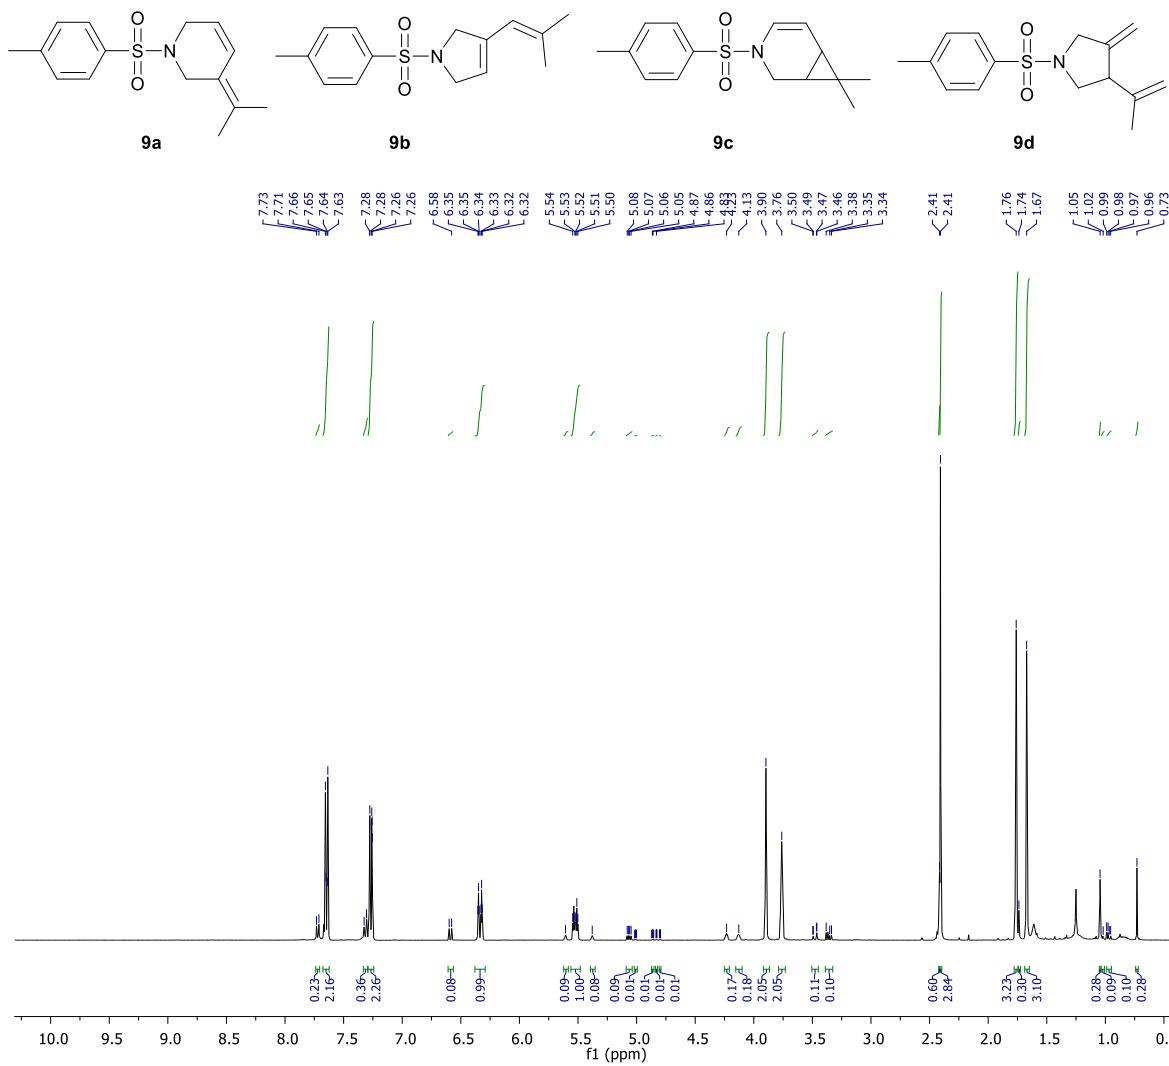

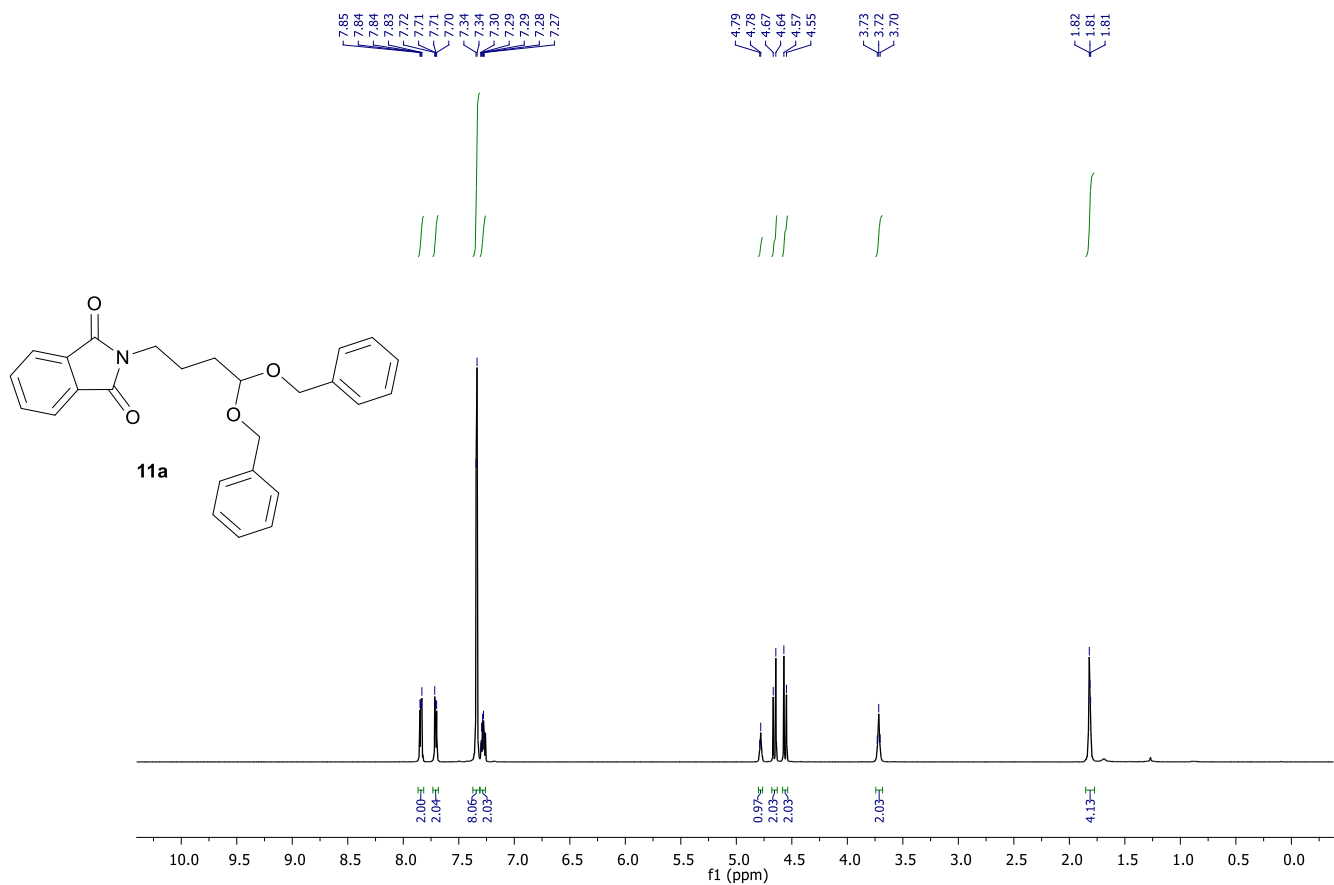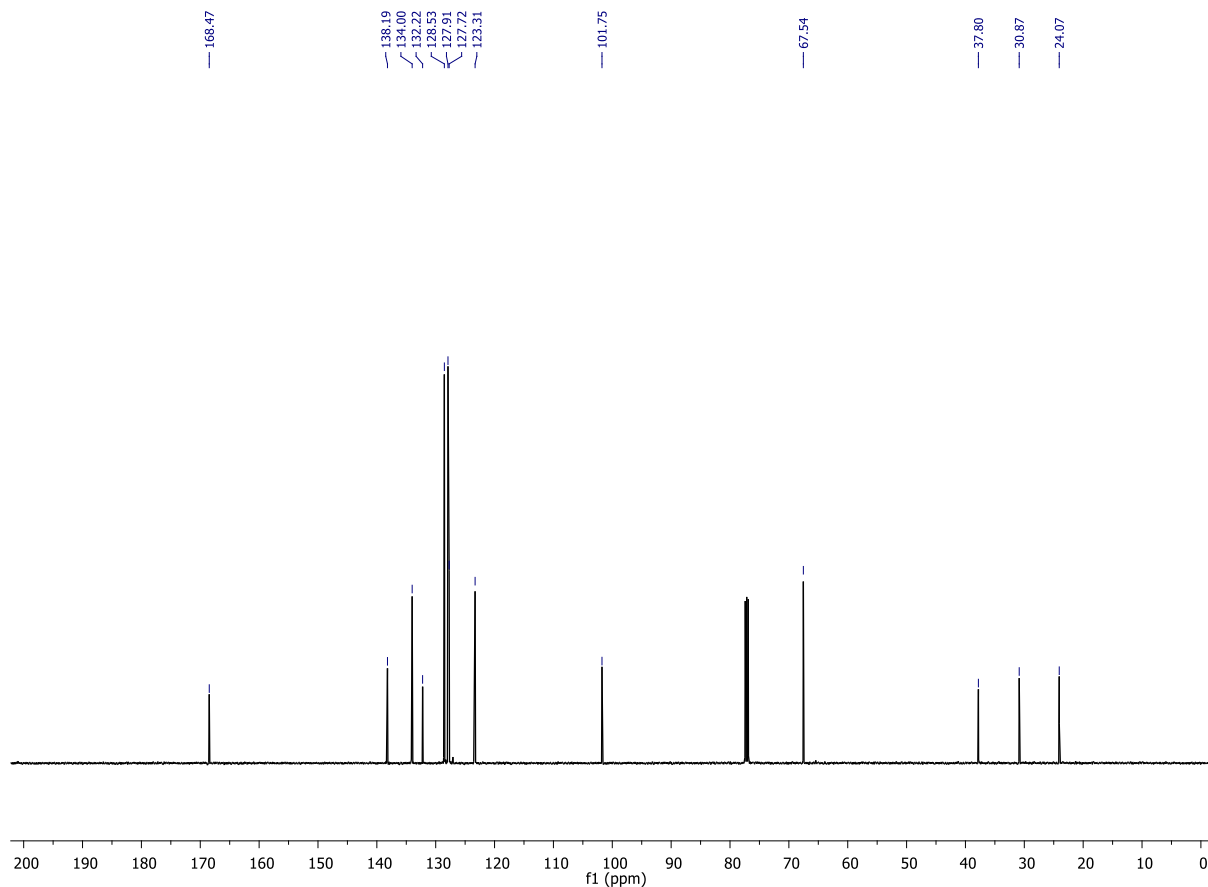

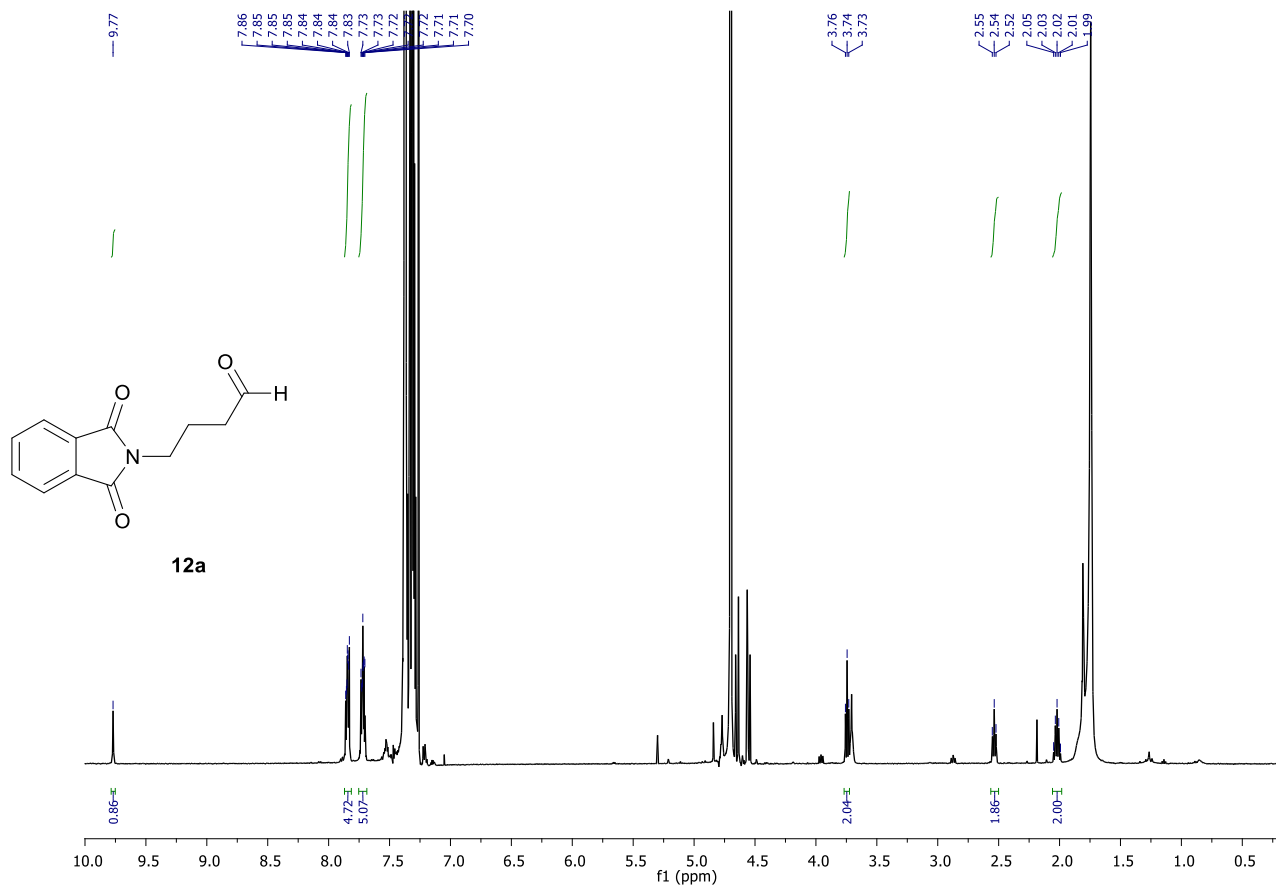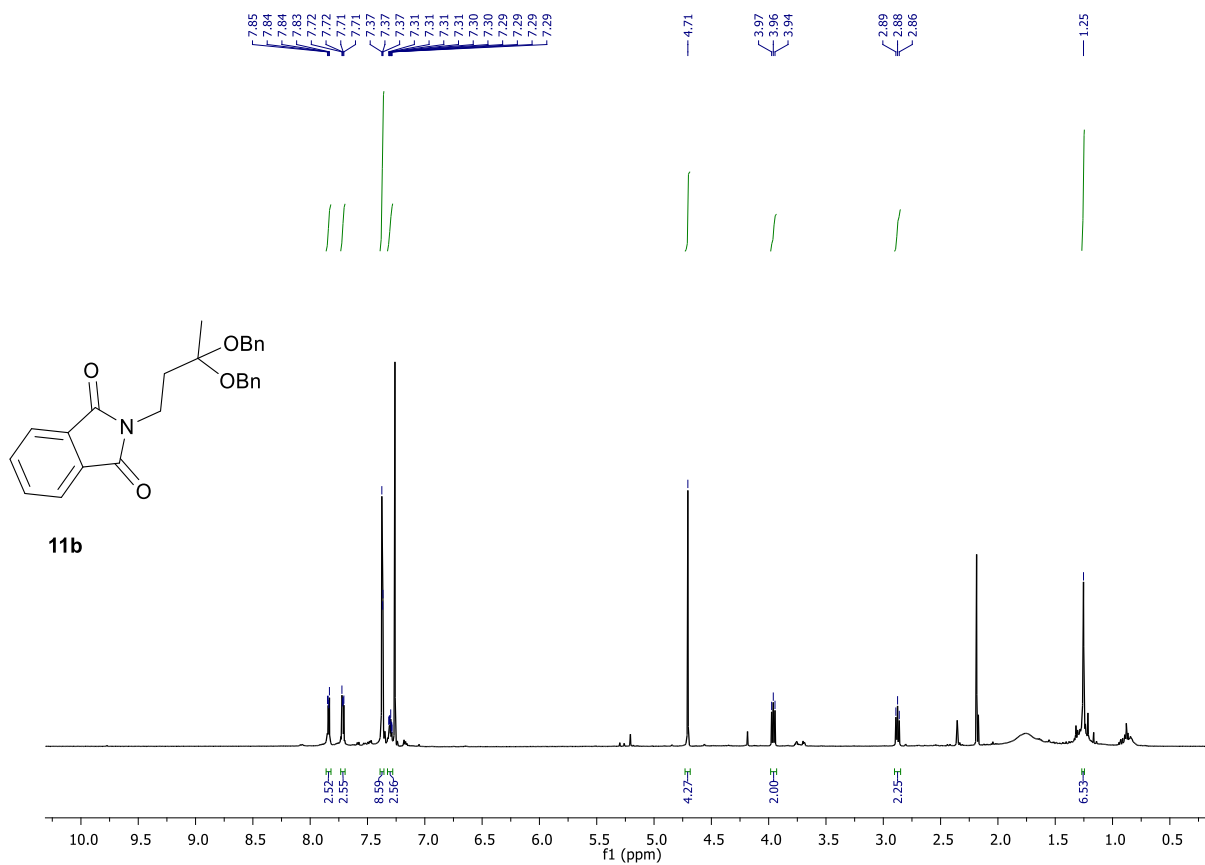

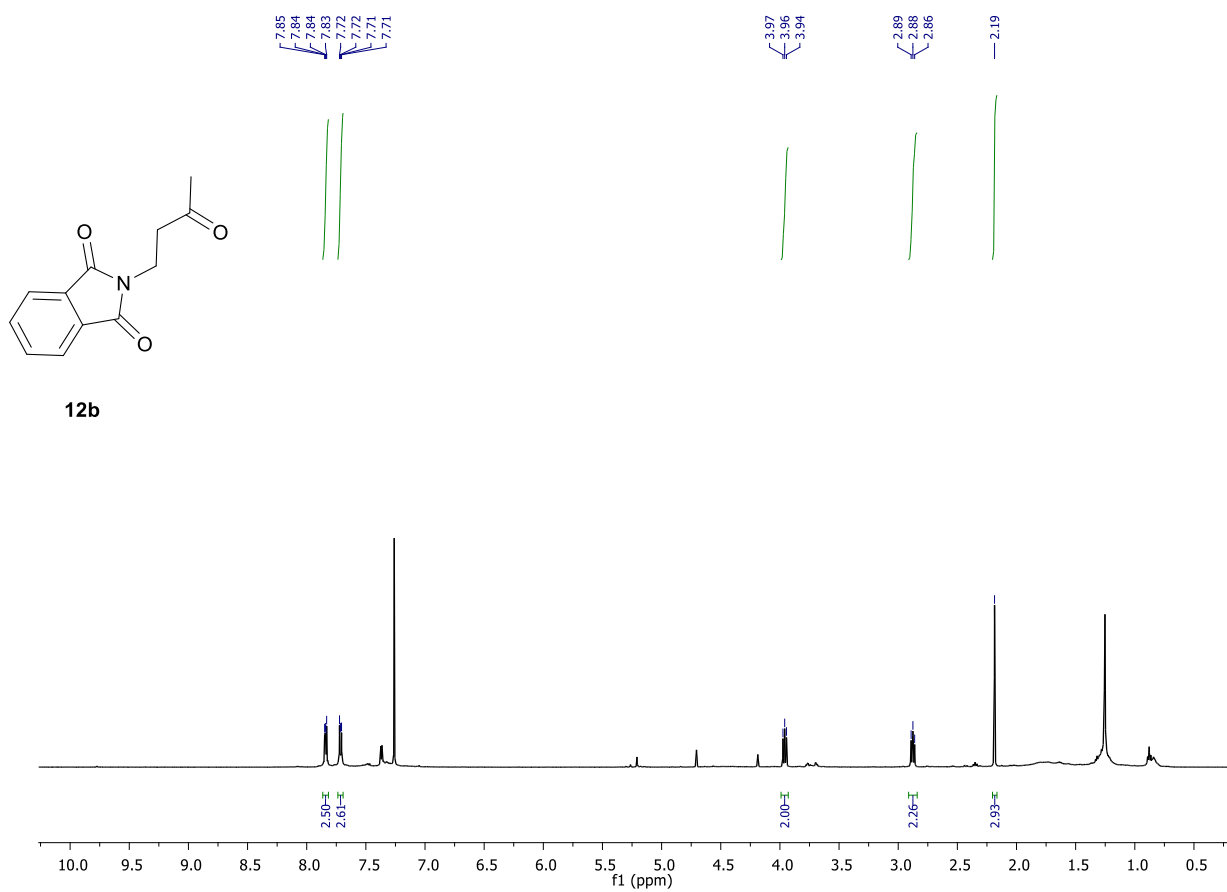



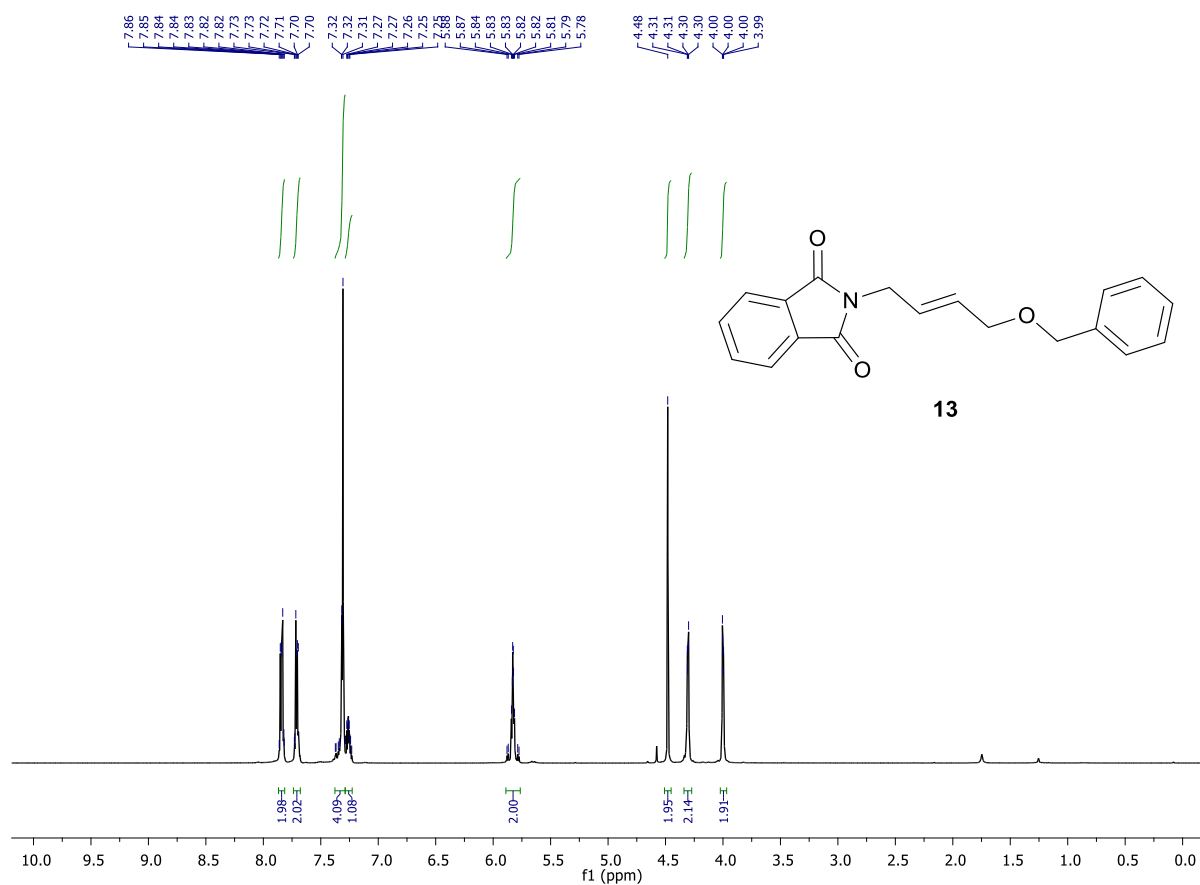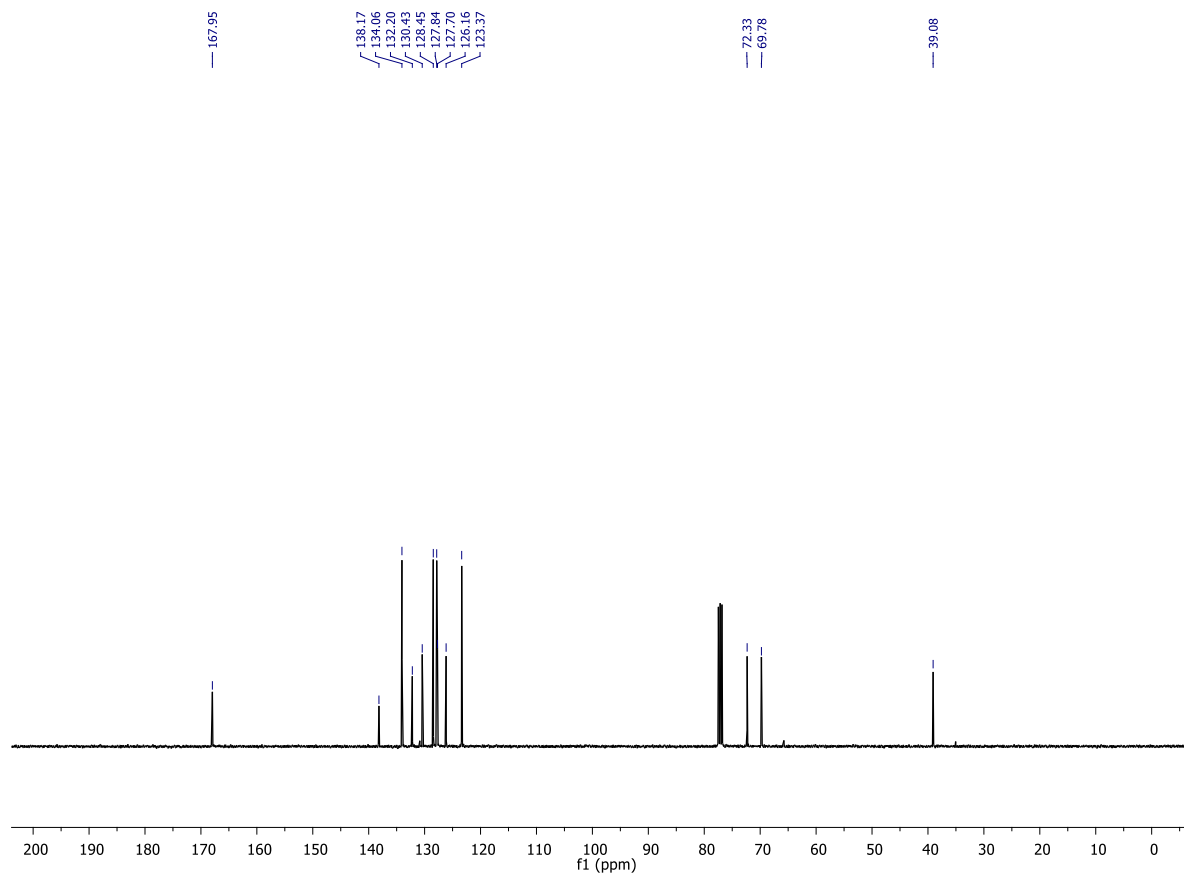

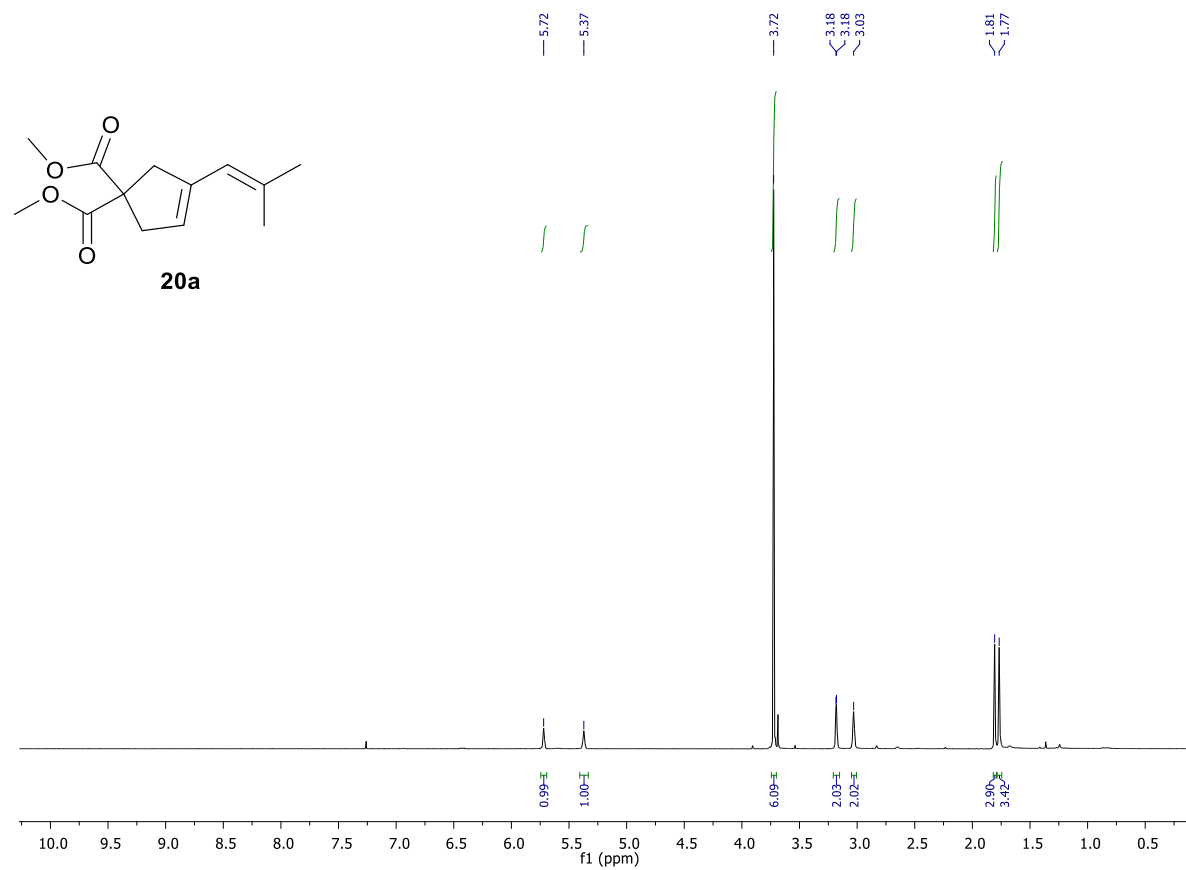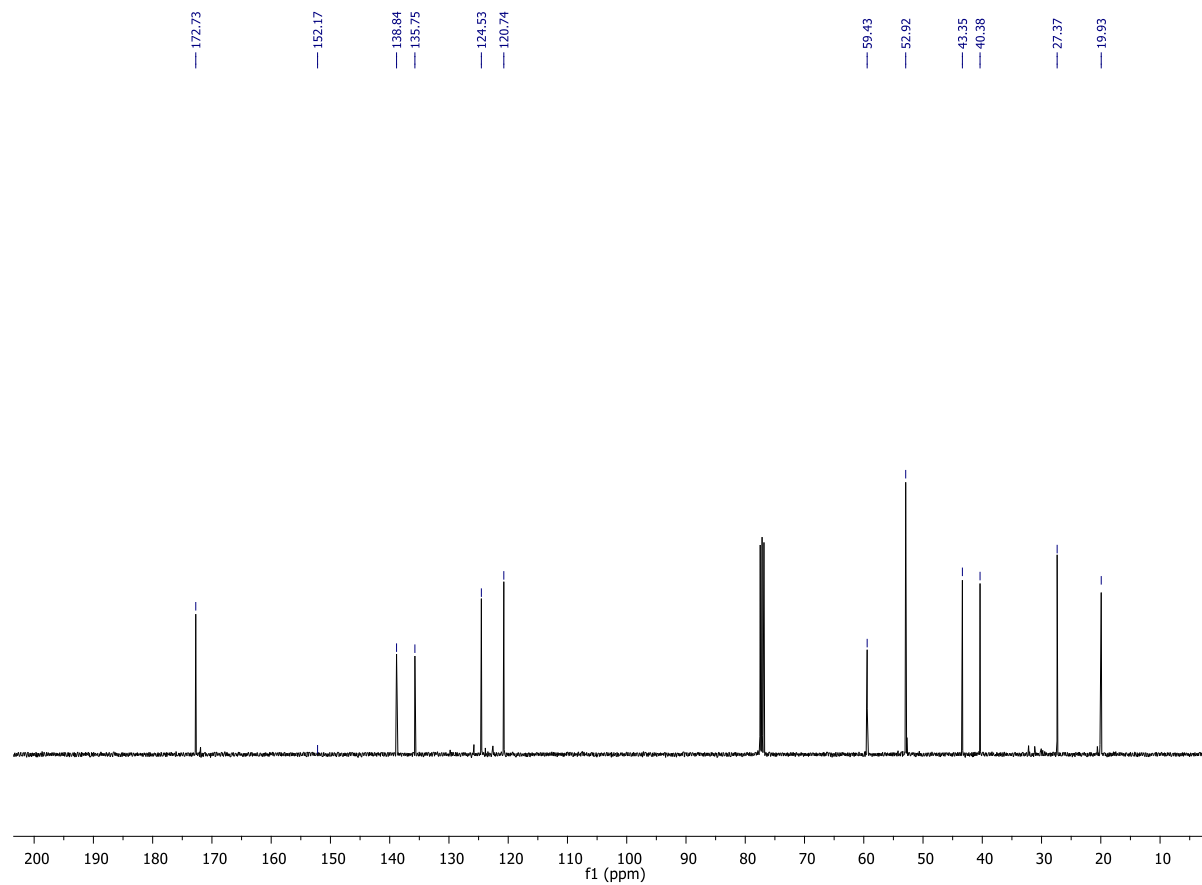

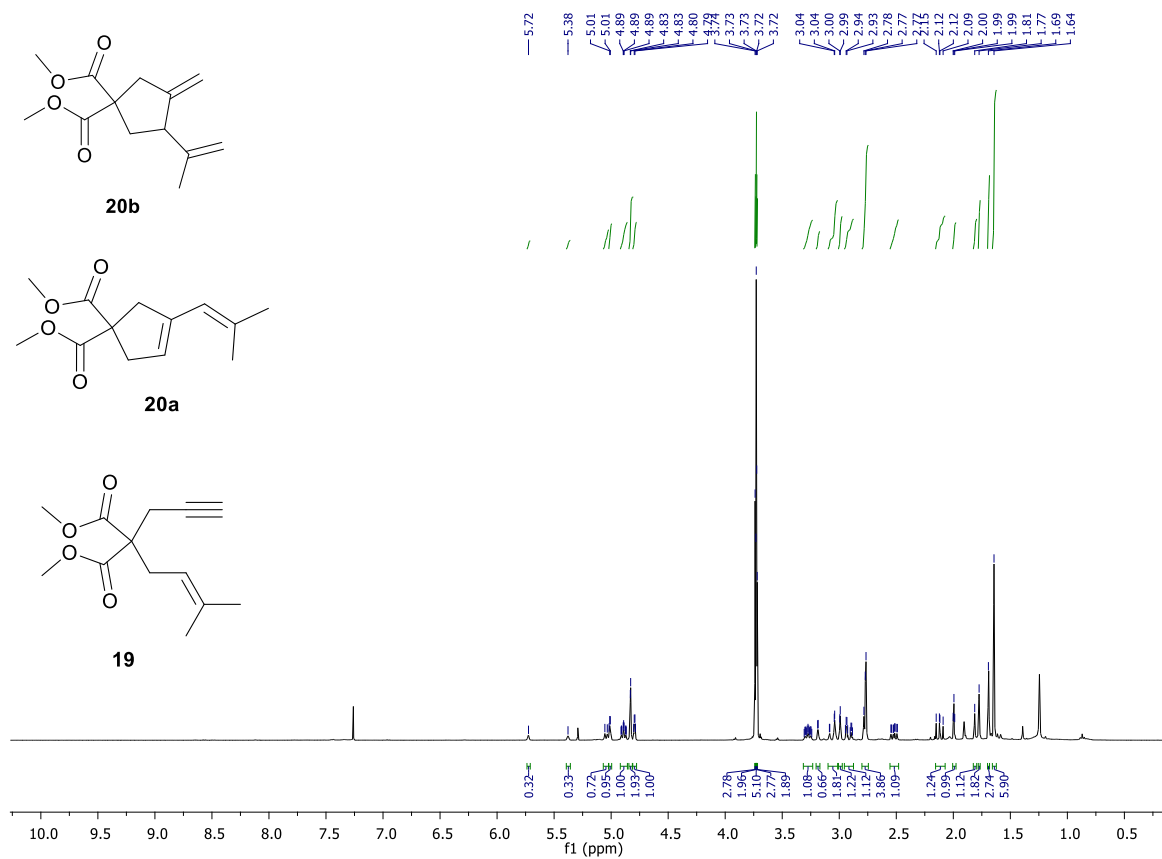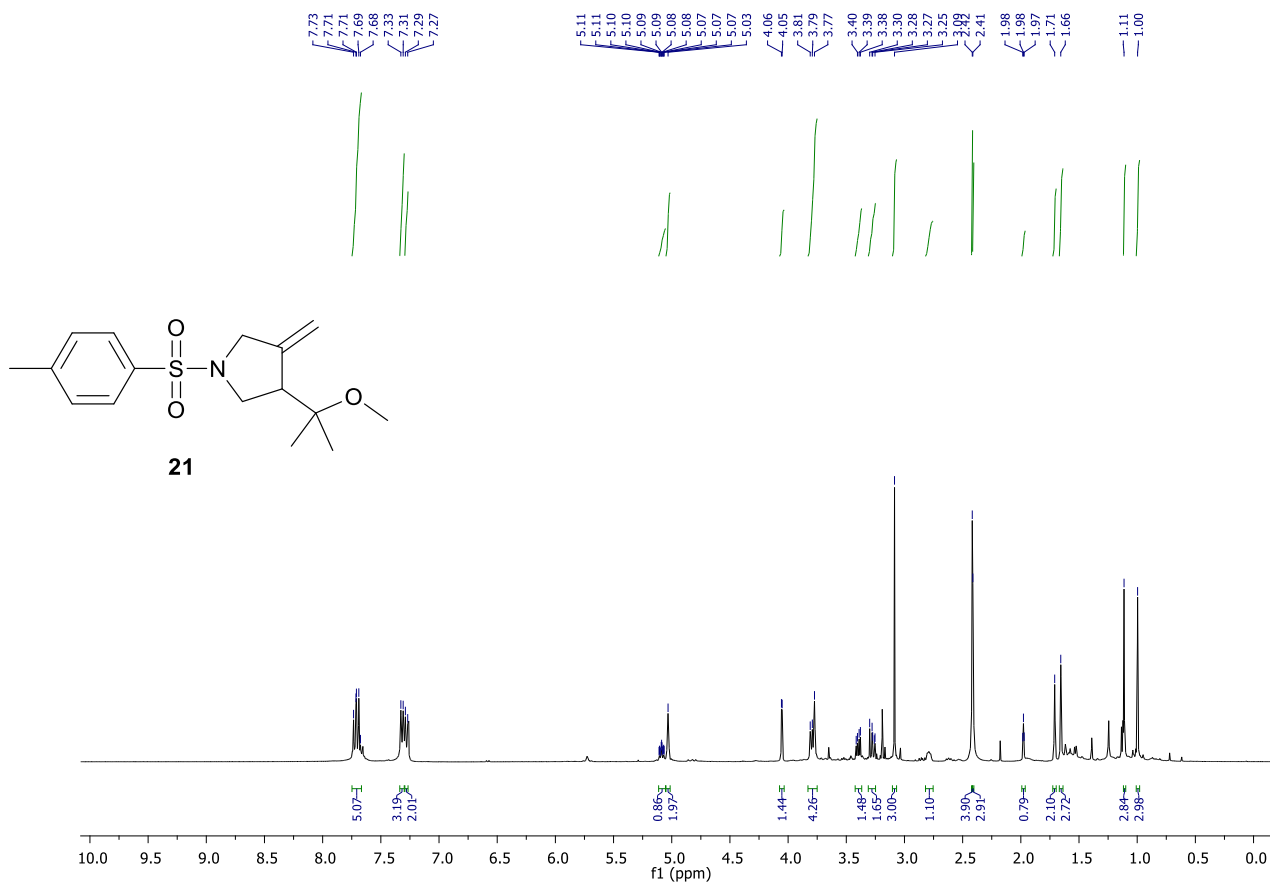

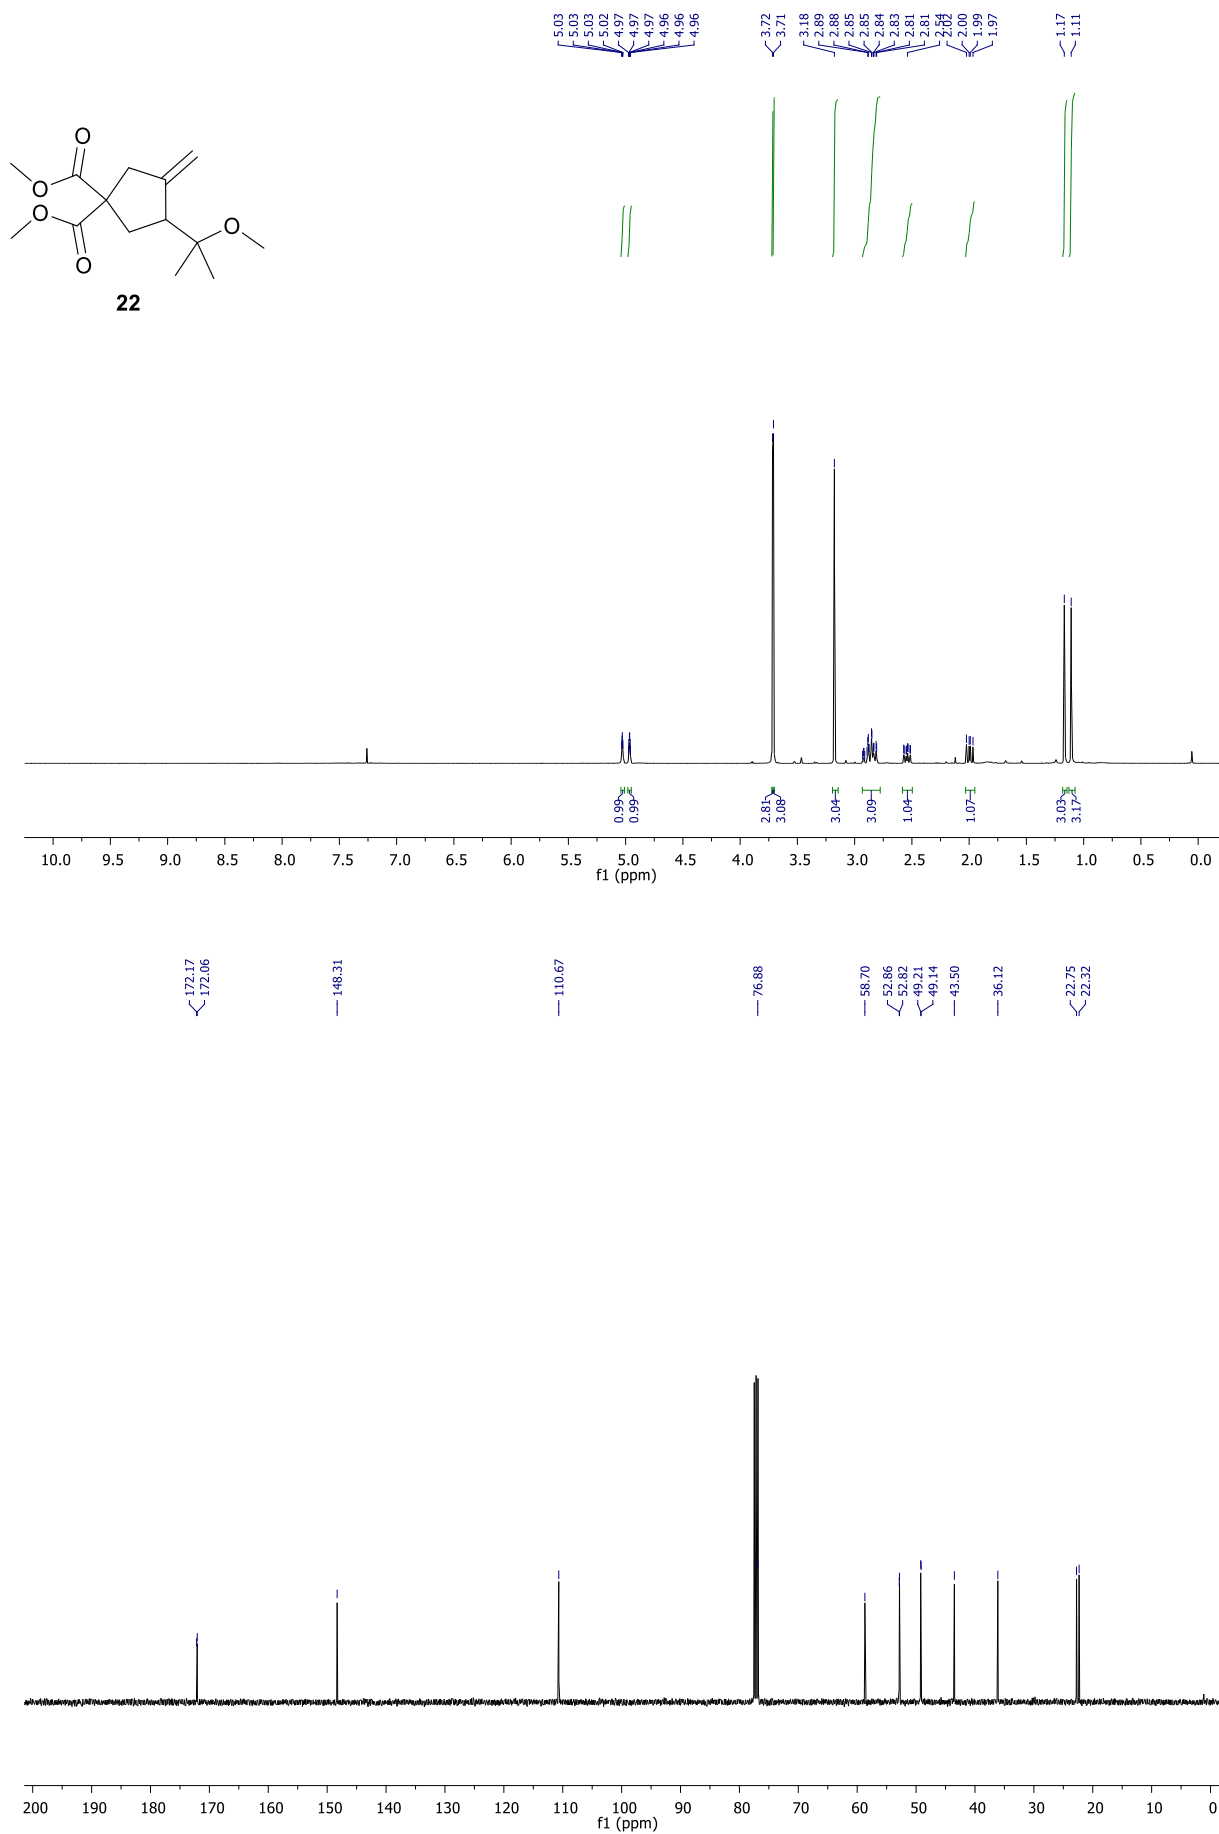

#### 4. X-ray structure determination

Crystal of **2b** was mounted on a small loop and fixed in the cold nitrogen stream on the Rigaku Oxford Diffraction XtaLAB Synergy diffractometer, equipped with Mo-K $\alpha$  radiation, HyPix detector and a mirror monochromator. Intensity data were measured by thin-slice  $\omega$ -scans. Data was processed using the CrysAlisPro-CCD and -RED programs.<sup>23</sup> The structure was determined by the intrinsic phasing routines in the SHELXT program and refined by full-matrix least-squares methods, on F<sup>2</sup>s, in SHELXL.<sup>24,25</sup> The non-hydrogen atoms were refined with anisotropic thermal parameters. Hydrogen atoms were included in idealised positions and their Uiso values were set to ride on the Ueq values of the parent carbon atoms. In the final difference map the highest peaks were near the Pd atom.

CCDC deposition number: 2094617

|                                                           |                                                                   |
|-----------------------------------------------------------|-------------------------------------------------------------------|
| <b>Empirical formula</b>                                  | C <sub>25</sub> H <sub>26</sub> Cl <sub>2</sub> N <sub>2</sub> Pd |
| <b>Formula weight</b>                                     | 531.78                                                            |
| <b>Temperature/K</b>                                      | 100.00(10)                                                        |
| <b>Crystal system</b>                                     | Monoclinic                                                        |
| <b>Space group</b>                                        | P 2 <sub>1</sub> /c                                               |
| <b>a [Å]</b>                                              | 9.3560(3)                                                         |
| <b>b [Å]</b>                                              | 14.1423(4)                                                        |
| <b>c [Å]</b>                                              | 17.5530(5)                                                        |
| <b><math>\alpha</math> [°]</b>                            | 90                                                                |
| <b><math>\beta</math> [°]</b>                             | 103.017(3)                                                        |
| <b><math>\gamma</math> [°]</b>                            | 90                                                                |
| <b>Volume [Å<sup>3</sup>]</b>                             | 2262.85(12)                                                       |
| <b>Z</b>                                                  | 4                                                                 |
| <b><math>\rho</math> calc [g/cm<sup>3</sup>]</b>          | 1.561                                                             |
| <b><math>\mu</math> [mm<sup>-1</sup>]</b>                 | 1.071                                                             |
| <b>F(000)</b>                                             | 1080.0                                                            |
| <b>Crystal size [mm]</b>                                  | 0.332 × 0.286 × 0.019                                             |
| <b>Radiation</b>                                          | Mo K $\alpha$ ( $\lambda$ = 0.71073)                              |
| <b>2<math>\theta</math> range for data collection [°]</b> | 4.468 to 61.994                                                   |
| <b>Index ranges</b>                                       | -11 ≤ h ≤ 12, -19 ≤ k ≤ 17, -22 ≤ l ≤ 21                          |
| <b>Reflections collected</b>                              | 26885                                                             |
| <b>Independent reflections</b>                            | 5767 [Rint = 0.0316, Rsigma = 0.0217]                             |
| <b>Data/restraints/parameters</b>                         | 5767/0/276                                                        |
| <b>Goodness-of-fit on F<sup>2</sup></b>                   | 1.063                                                             |

Final R indexes [ $I \geq 2\sigma(I)$ ]  $R_1 = 0.0240$ ,  $wR_2 = 0.0567$

Final R indexes [all data]  $R_1 = 0.0262$ ,  $wR_2 = 0.0574$

Largest diff. peak/hole [ $e \text{ \AA}^{-3}$ ] 0.65/-0.71

**Table 4S.** Fractional atomic coordinates ( $\times 10^4$ ) and equivalent isotropic displacement parameters ( $\text{\AA}^2 \times 10^3$ ).  $U_{eq}$  is defined as 1/3 of the trace of the orthogonalised  $U_{ij}$  tensor.

| Atom | x          | y          | z          | U(eq)    |
|------|------------|------------|------------|----------|
| Pd01 | 2358.9(2)  | 2603.0(2)  | 4526.2(2)  | 10.33(4) |
| Cl02 | -9.8(5)    | 2741.9(3)  | 4728.0(2)  | 14.91(8) |
| Cl03 | 4543.6(5)  | 2330.6(3)  | 4146.6(3)  | 17.11(9) |
| N004 | 2503.2(16) | 1287.3(10) | 4995.4(8)  | 12.4(3)  |
| N005 | 2634.6(16) | 4035.3(10) | 4458.0(8)  | 12.1(3)  |
| C006 | 2968.6(18) | 4450.7(12) | 5180.5(10) | 12.1(3)  |
| C007 | 3497.5(18) | 2986.8(12) | 5923.6(9)  | 12.2(3)  |
| C008 | 3413.6(19) | 1259.0(12) | 5718.1(10) | 12.4(3)  |
| C009 | 4121.9(19) | 2148.2(12) | 6072.3(9)  | 12.4(3)  |
| C00A | 2930.1(18) | 3846.3(11) | 5876.9(9)  | 11.4(3)  |
| C00B | 3024(2)    | 5501.5(13) | 3864.6(11) | 17.2(3)  |
| C00C | 5614.3(19) | 2090.6(12) | 6610.4(10) | 12.7(3)  |
| C00D | 8228(2)    | 1834.1(13) | 6807.1(11) | 17.8(4)  |
| C00E | 1779(2)    | 503.9(12)  | 4673.9(10) | 15.3(3)  |
| C00F | 2171.1(19) | 4197.5(12) | 6522.4(10) | 12.9(3)  |
| C00G | 6826(2)    | 1816.6(12) | 6321.6(10) | 15.6(3)  |
| C00H | 3339.1(19) | 5404.0(12) | 5251.0(10) | 14.6(3)  |
| C00I | 3362(2)    | 5933.6(13) | 4587.9(11) | 18.2(4)  |
| C00J | 7212(2)    | 2335.1(13) | 7882.7(11) | 18.2(4)  |
| C00K | 5813(2)    | 2348.2(12) | 7397.0(10) | 15.4(3)  |
| C00L | 2671.2(19) | 4542.2(12) | 3810.0(10) | 14.0(3)  |
| C00M | 3314(2)    | 4695.5(13) | 7169.9(10) | 16.9(3)  |
| C00N | 8415(2)    | 2093.6(13) | 7588.7(12) | 19.9(4)  |
| C00O | 1545(2)    | 3338.5(13) | 6877.0(11) | 18.4(4)  |
| C00P | 3669(2)    | 409.6(12)  | 6126.1(11) | 16.3(3)  |
| C00Q | 891(2)     | 4866.2(13) | 6186.1(11) | 18.3(4)  |
| C00R | 1964(2)    | -344.5(13) | 5080.2(11) | 17.7(3)  |
| C00S | 2329(2)    | 4041.2(14) | 3036.2(10) | 19.2(4)  |
| C00T | 2925(2)    | -400.8(12) | 5802.4(11) | 18.8(4)  |
| C00U | 835(2)     | 600.6(14)  | 3865.5(11) | 20.6(4)  |

**Table 5S.** Anisotropic displacement parameters ( $\text{\AA}^2 \times 10^3$ ). The anisotropic displacement factor exponent takes the form:  $-2\pi^2[h2a^*2U_{11}+2hka^*b^*U_{12}+...]$ .

| Atom | $U_{11}$  | $U_{22}$ | $U_{33}$  | $U_{23}$ | $U_{13}$ | $U_{12}$  |
|------|-----------|----------|-----------|----------|----------|-----------|
| Pd01 | 12.37(7)  | 9.59(7)  | 8.66(7)   | 0.63(4)  | 1.57(5)  | 0.16(4)   |
| Cl02 | 12.63(18) | 15.2(2)  | 15.98(19) | 0.16(13) | 1.21(15) | -0.18(13) |
| Cl03 | 18.0(2)   | 19.1(2)  | 15.9(2)   | 0.99(14) | 7.31(16) | 2.91(15)  |
| N004 | 14.9(7)   | 10.7(7)  | 11.7(7)   | 0.0(5)   | 3.5(6)   | 0.8(5)    |
| N005 | 11.5(7)   | 11.5(7)  | 13.0(7)   | 1.9(5)   | 2.3(5)   | 0.1(5)    |
| C006 | 9.6(7)    | 12.4(8)  | 13.9(8)   | 1.7(6)   | 1.5(6)   | 1.0(5)    |
| C007 | 12.3(8)   | 16.0(8)  | 7.9(7)    | -0.1(6)  | 1.7(6)   | -1.3(6)   |
| C008 | 12.7(8)   | 12.7(8)  | 12.6(8)   | 0.6(6)   | 4.2(6)   | 1.4(6)    |
| C009 | 15.2(8)   | 12.8(8)  | 9.0(7)    | 0.5(5)   | 2.3(6)   | 0.6(6)    |
| C00A | 11.6(8)   | 11.1(8)  | 10.4(7)   | -0.3(5)  | 0.1(6)   | -0.9(5)   |
| C00B | 15.3(8)   | 16.9(9)  | 19.4(9)   | 7.7(6)   | 4.0(7)   | -0.3(6)   |
| C00C | 14.7(8)   | 9.6(7)   | 13.1(8)   | 2.7(6)   | 1.3(6)   | 0.9(6)    |
| C00D | 13.9(8)   | 15.9(9)  | 24.2(9)   | -0.3(6)  | 5.5(7)   | 0.8(6)    |

|      |          |         |         |         |         |         |
|------|----------|---------|---------|---------|---------|---------|
| C00E | 16.6(8)  | 13.4(8) | 16.6(8) | -3.6(6) | 5.5(7)  | -0.1(6) |
| C00F | 13.8(8)  | 13.0(8) | 11.4(8) | -0.9(6) | 1.9(6)  | 0.2(6)  |
| C00G | 19.4(9)  | 13.9(8) | 13.6(8) | 1.2(6)  | 3.9(7)  | 2.1(6)  |
| C00H | 14.7(8)  | 12.1(8) | 16.3(8) | 0.8(6)  | 1.7(7)  | -0.3(6) |
| C00I | 17.9(9)  | 11.2(8) | 24.7(9) | 5.2(6)  | 3.1(7)  | -1.2(6) |
| C00J | 22.3(9)  | 15.3(9) | 14.3(8) | -1.2(6) | -1.7(7) | 1.7(6)  |
| C00K | 17.7(8)  | 14.0(8) | 14.5(8) | 0.5(6)  | 3.5(7)  | 3.5(6)  |
| C00L | 12.3(8)  | 15.7(8) | 13.6(8) | 3.6(6)  | 2.4(6)  | 2.1(6)  |
| C00M | 20.0(9)  | 17.2(9) | 12.0(8) | -3.7(6) | 0.8(7)  | -0.1(6) |
| C00N | 15.7(9)  | 16.2(9) | 24.3(9) | 0.6(7)  | -3.2(7) | 0.1(6)  |
| C00O | 22.3(9)  | 19.1(9) | 15.5(8) | -0.1(6) | 8.1(7)  | -3.2(7) |
| C00P | 18.6(9)  | 13.9(8) | 16.0(8) | 3.5(6)  | 3.2(7)  | 3.0(6)  |
| C00Q | 16.1(8)  | 20.0(9) | 18.7(9) | -0.2(6) | 4.1(7)  | 5.1(6)  |
| C00R | 20.3(9)  | 12.3(8) | 22.3(9) | -3.3(6) | 8.6(7)  | -1.3(6) |
| C00S | 22.8(9)  | 21.7(9) | 12.7(8) | 3.6(6)  | 3.4(7)  | 0.6(7)  |
| C00T | 24.9(9)  | 9.7(8)  | 23.3(9) | 3.2(6)  | 8.3(8)  | 1.8(6)  |
| C00U | 26.4(10) | 17.9(9) | 16.0(9) | -3.7(6) | 1.6(7)  | -3.1(7) |

Table 6S. Bond lengths.

| Atom | Atom | Length/Å   | Atom | Atom | Length/Å |
|------|------|------------|------|------|----------|
| Pd01 | Cl02 | 2.3300(4)  | C00B | C00I | 1.380(3) |
| Pd01 | Cl03 | 2.3203(5)  | C00B | C00L | 1.395(2) |
| Pd01 | N004 | 2.0269(14) | C00C | C00G | 1.397(3) |
| Pd01 | N005 | 2.0489(14) | C00C | C00K | 1.399(2) |
| Pd01 | C007 | 2.5038(16) | C00D | C00G | 1.394(2) |
| N004 | C008 | 1.360(2)   | C00D | C00N | 1.393(3) |
| N004 | C00E | 1.354(2)   | C00E | C00R | 1.387(3) |
| N005 | C006 | 1.368(2)   | C00E | C00U | 1.499(2) |
| N005 | C00L | 1.351(2)   | C00F | C00M | 1.544(2) |
| C006 | C00A | 1.499(2)   | C00F | C00O | 1.540(2) |
| C006 | C00H | 1.391(2)   | C00F | C00Q | 1.536(2) |
| C007 | C009 | 1.322(2)   | C00H | C00I | 1.388(2) |
| C007 | C00A | 1.321(2)   | C00J | C00K | 1.392(3) |
| C008 | C009 | 1.490(2)   | C00J | C00N | 1.383(3) |
| C008 | C00P | 1.391(2)   | C00L | C00S | 1.501(2) |
| C009 | C00C | 1.501(2)   | C00P | C00T | 1.394(3) |
| C00A | C00F | 1.548(2)   | C00R | C00T | 1.382(3) |

Table 7S. Bond angles.

| Atom | Atom | Atom | Angle/°     | Atom | Atom | Atom | Angle/°    |
|------|------|------|-------------|------|------|------|------------|
| Cl02 | Pd01 | C007 | 92.41(4)    | C007 | C00A | C006 | 119.48(16) |
| Cl03 | Pd01 | Cl02 | 170.825(16) | C007 | C00A | C00F | 119.58(15) |
| Cl03 | Pd01 | C007 | 96.28(4)    | C00I | C00B | C00L | 119.70(17) |
| N004 | Pd01 | Cl02 | 89.67(4)    | C00G | C00C | C009 | 120.17(15) |
| N004 | Pd01 | Cl03 | 88.97(4)    | C00G | C00C | C00K | 119.47(16) |
| N004 | Pd01 | N005 | 159.00(6)   | C00K | C00C | C009 | 120.31(16) |
| N004 | Pd01 | C007 | 80.00(6)    | C00N | C00D | C00G | 119.95(18) |
| N005 | Pd01 | Cl02 | 93.56(4)    | N004 | C00E | C00R | 120.07(16) |
| N005 | Pd01 | Cl03 | 90.96(4)    | N004 | C00E | C00U | 116.92(16) |
| N005 | Pd01 | C007 | 79.13(6)    | C00R | C00E | C00U | 122.98(16) |
| C008 | N004 | Pd01 | 112.11(11)  | C00M | C00F | C00A | 109.21(14) |
| C00E | N004 | Pd01 | 126.91(12)  | C00O | C00F | C00A | 108.78(14) |
| C00E | N004 | C008 | 120.95(15)  | C00O | C00F | C00M | 109.02(14) |
| C006 | N005 | Pd01 | 112.07(11)  | C00Q | C00F | C00A | 111.28(14) |
| C00L | N005 | Pd01 | 126.94(12)  | C00Q | C00F | C00M | 110.67(14) |
| C00L | N005 | C006 | 120.56(15)  | C00Q | C00F | C00O | 107.83(15) |
| N005 | C006 | C00A | 117.94(14)  | C00D | C00G | C00C | 120.13(17) |

|      |      |      |            |      |      |      |            |
|------|------|------|------------|------|------|------|------------|
| N005 | C006 | C00H | 119.93(16) | C00I | C00H | C006 | 119.94(17) |
| C00H | C006 | C00A | 122.12(15) | C00B | C00I | C00H | 119.27(16) |
| C009 | C007 | Pd01 | 94.04(11)  | C00N | C00J | C00K | 120.46(17) |
| C00A | C007 | Pd01 | 93.57(11)  | C00J | C00K | C00C | 119.91(17) |
| C00A | C007 | C009 | 172.31(17) | N005 | C00L | C00B | 120.59(16) |
| N004 | C008 | C009 | 119.37(14) | N005 | C00L | C00S | 118.07(15) |
| N004 | C008 | C00P | 120.28(16) | C00B | C00L | C00S | 121.35(16) |
| C00P | C008 | C009 | 120.34(15) | C00J | C00N | C00D | 120.02(17) |
| C007 | C009 | C008 | 122.65(15) | C008 | C00P | C00T | 119.22(16) |
| C007 | C009 | C00C | 118.68(15) | C00T | C00R | C00E | 120.12(17) |
| C008 | C009 | C00C | 118.67(14) | C00R | C00T | C00P | 119.25(16) |
| C006 | C00A | C00F | 120.87(14) |      |      |      |            |

**Table 8S.** Hydrogen atom coordinates ( $\text{\AA}\times 10^4$ ) and isotropic displacement parameters ( $\text{\AA}^2\times 10^3$ ).

| Atom | x       | y       | z       | U(eq) |
|------|---------|---------|---------|-------|
| H00B | 3032.31 | 5848.6  | 3415.52 | 21    |
| H00D | 9037.56 | 1672.53 | 6609.24 | 21    |
| H00G | 6697.87 | 1622.29 | 5804.45 | 19    |
| H00H | 3571.38 | 5686.57 | 5741.83 | 18    |
| H00I | 3602.24 | 6572.46 | 4630.73 | 22    |
| H00J | 7337.62 | 2489.8  | 8408.59 | 22    |
| H00K | 5011.56 | 2527.94 | 7594.9  | 19    |
| H00A | 4083.98 | 4259.16 | 7388.06 | 25    |
| H00C | 2849.38 | 4910.6  | 7573.14 | 25    |
| H00E | 3720.83 | 5226.42 | 6951.07 | 25    |
| H00N | 9349.93 | 2104.47 | 7913.09 | 24    |
| H00F | 884.63  | 2999.54 | 6470.64 | 28    |
| H00L | 1026.08 | 3551.19 | 7258.79 | 28    |
| H00M | 2333.12 | 2929.31 | 7122.66 | 28    |
| H00P | 4327.58 | 383     | 6609.17 | 20    |
| H00O | 1259.76 | 5423.47 | 5983.72 | 27    |
| H00Q | 403.28  | 5041.04 | 6591.44 | 27    |
| H00R | 209.1   | 4552.2  | 5772.92 | 27    |
| H00S | 1439.4  | -876.55 | 4866.19 | 21    |
| H00T | 3190.96 | 3719.98 | 2960.98 | 29    |
| H00U | 2018.28 | 4493.54 | 2624.42 | 29    |
| H00V | 1560.01 | 3589.59 | 3028.28 | 29    |
| H00W | 3074.64 | -973.12 | 6069.52 | 23    |
| H00X | 168.86  | 1119.46 | 3852.38 | 31    |
| H00Y | 289.05  | 27.91   | 3724.31 | 31    |
| H    | 1444.3  | 716.17  | 3502.17 | 31    |



## 5. Stability in solution

Samples of **3b** (0.4 mL, 0.036 mmol/mL) and **3a** (0.4 mL, 0.035 mmol/mL) in DMSO- $d_6$  were submitted to a series of  $^1\text{H}$  NMR experiments at 2 h intervals for 48 h, then were collected once every 2-3 days for 13 days since the initial sample preparation.

The spectrum of the **3b** remained unchanged in the 13 day period (Figure 3S and 4S). There were no changes in the intensity of signals corresponding to the phenyl group (7.32-7.48 ppm) or the broadened pyridyl peaks (7.55-8.40 ppm). No new signals were observed.

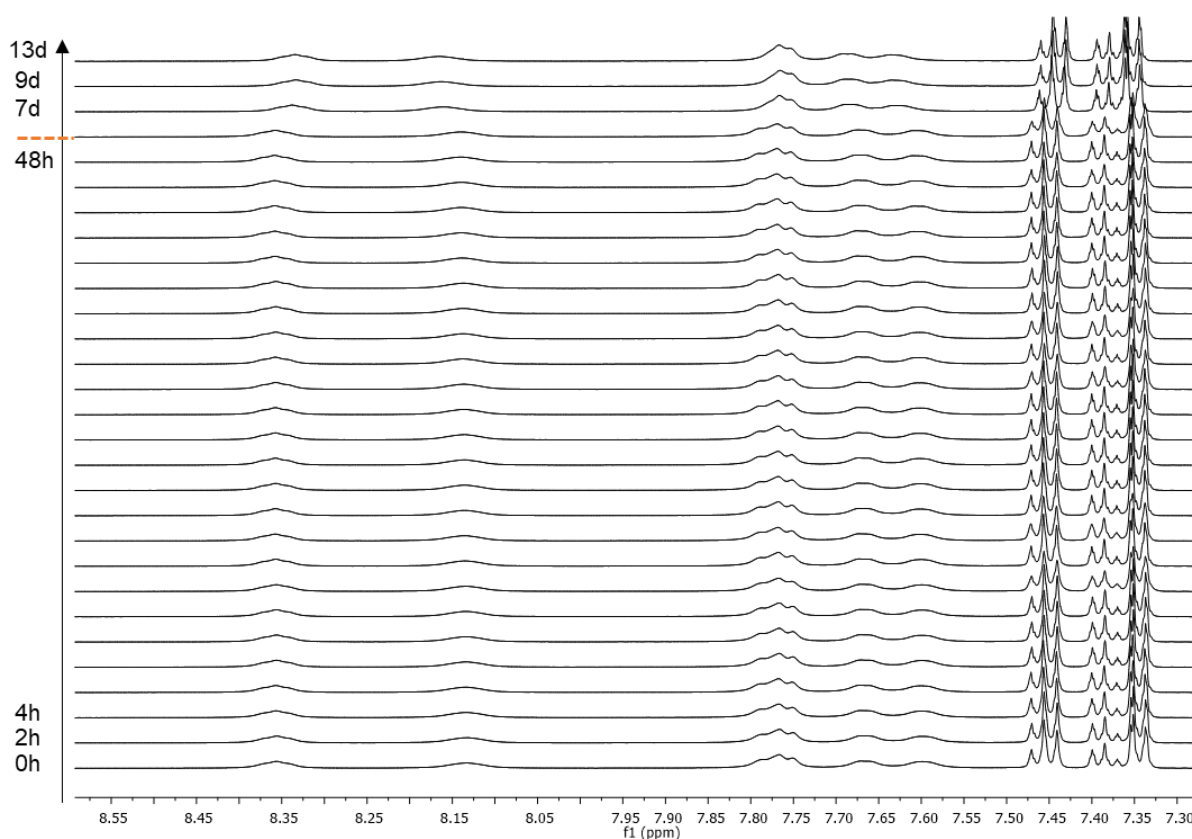

**Figure 3S.** Aromatic region of the  $^1\text{H}$  NMR spectrum of **3b** recorded in the space of 13 days.

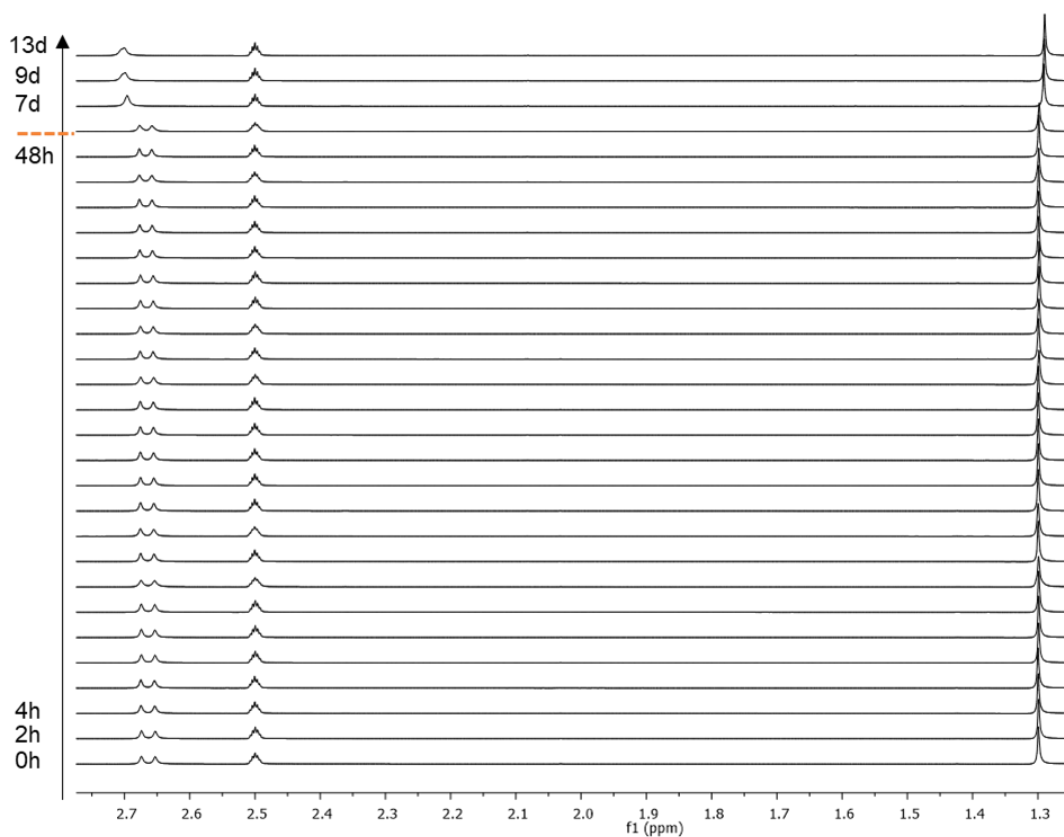

**Figure 4S.** Aliphatic region of the <sup>1</sup>H NMR spectrum of **3b** recorded in the space of 13 days.

Pt(IV)-Complex **3a** started to decompose/react in solution after a few hours from the preparation of the NMR sample (Figure 5S). At least two new unidentified species (**S1** and **S2**) started to appear on the spectrum after 6-8 h. Based on the integration of the triplet peaks corresponding to **3a**, **S1** and **S2** at 8.22 (corresponding to the pyridyl proton *meta* to the methyl group), 8.30 and 8.42 ppm, respectively, we could estimate the approximate share of **3a** in the mixture at different time intervals. Starting from 100% at the beginning, this share decreased to 67% after 12 h, through 54% after 24 h and 38% after 48 h. After 7 days the mixture did not contain **3a** at all.

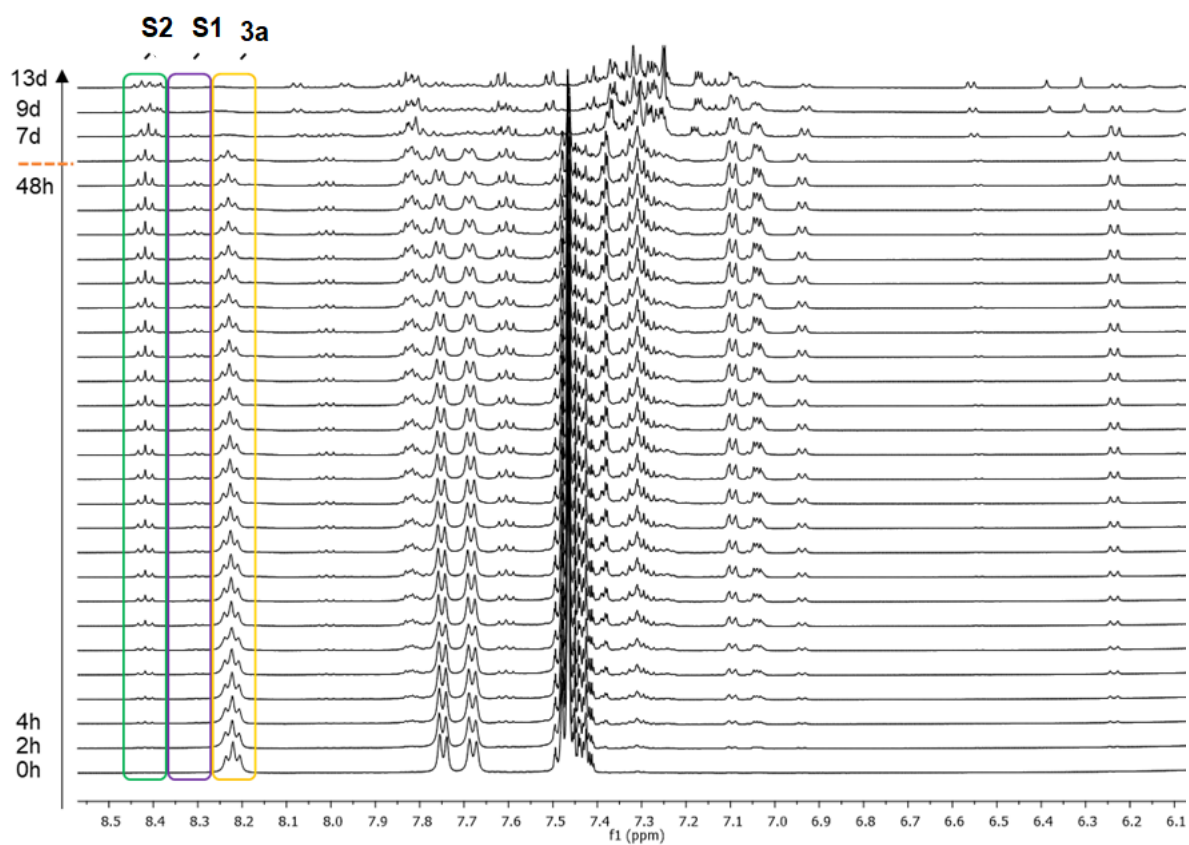

**Figure 5S.** Aromatic region of the  $^1\text{H}$  NMR spectrum of **3a** recorded in the space of 13 days.

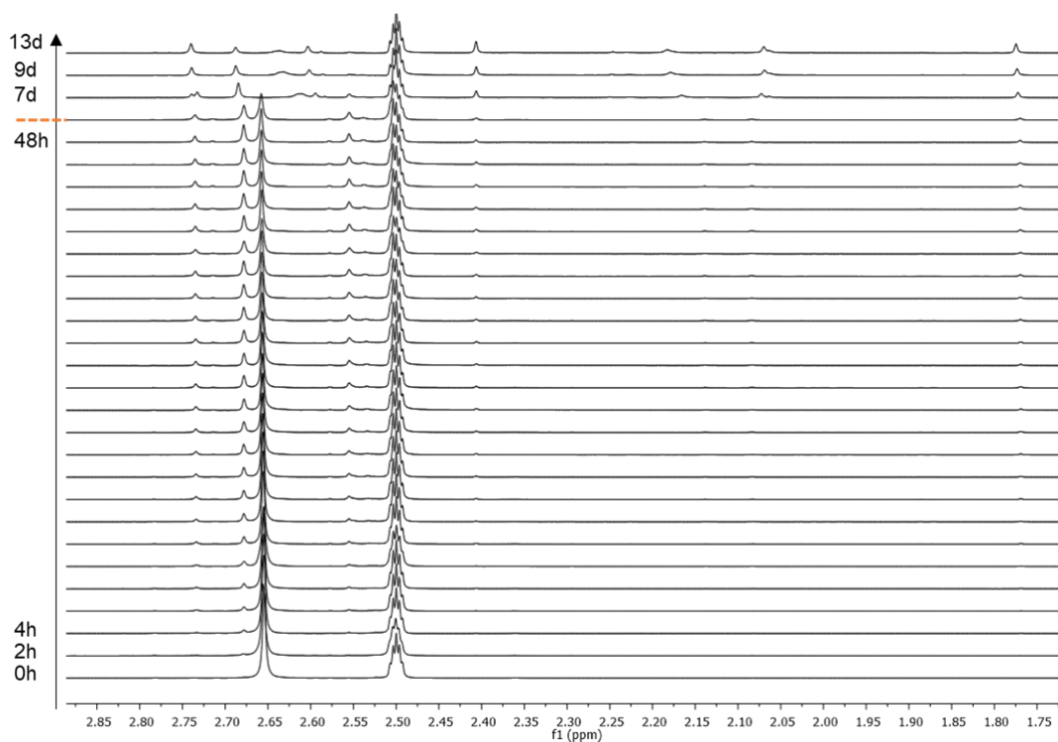

**Figure 6S.** Aliphatic region of the  $^1\text{H}$  NMR spectrum of **3a** recorded in the space of 13 days.

## 6. Antimicrobial studies

Procedures from CO-ADD are presented as received. The results for ligands **1a-b** and complexes **2-4** are presented below (Table 9 and Table 10).

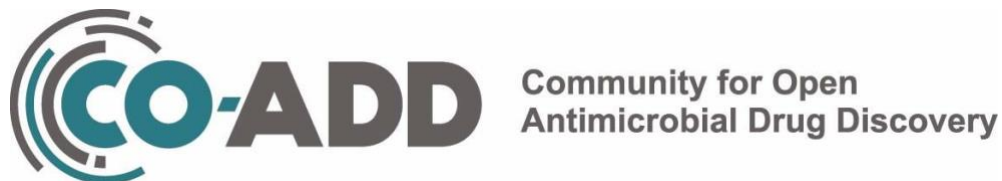

# Primary Antimicrobial Screening

## Bacterial and Fungal

## Procedure and Materials

## 1.0 Summary

### 1.1 Study

Primary antimicrobial screening study by whole cell growth inhibition assays, using the provided samples at a single concentration, in duplicate (n=2). The inhibition of growth is measured against 5 bacteria: *Escherichia coli*, *Klebsiella pneumoniae*, *Acinetobacter baumannii*, *Pseudomonas aeruginosa* and *Staphylococcus aureus*, and 2 fungi: *Candida albicans* and *Cryptococcus neoformans*.

### 1.2 Assay Parameters

|                                                                                  |                                                                           |
|----------------------------------------------------------------------------------|---------------------------------------------------------------------------|
| <b>Test concentration</b>                                                        | 32 µg/mL or 20 µM<br>≤1% DMSO                                             |
| <b>QC</b>                                                                        | Duplicate (n=2) Control<br>MIC: Pass                                      |
| <b>Plates</b>                                                                    | Non-Binding Surface, 384 well plate                                       |
| <b>Media</b><br><i>Bacteria</i><br><i>Fungi</i>                                  | Cation-adjusted Mueller Hinton broth<br>Yeast Nitrogen Base               |
| <b>Read Out</b><br><i>Bacteria</i><br><i>C. albicans</i><br><i>C. neoformans</i> | OD <sub>600</sub><br>OD <sub>530</sub><br>Resazurin OD <sub>600-570</sub> |

### 1.3 Outcomes

Primary Screening outcomes are detailed in individual Project reports, personalised for each Project Submission for each CO-ADD user.

Please see your data sheet with file extension **P0XXX\_PS\_data.xlsx**, for example CO-ADD Project **P0100**, **P0100\_PS\_data.xlsx**

### 1.4 Comments

To confirm the inhibitory activity, the hit compound/s will be re-tested against the strains in a dose response assay to determine the minimum inhibitory concentration (MIC) of

the compounds. Furthermore, to further evaluate the antimicrobial potential of the compounds they will be assayed against a mammalian cell line to determine general cell toxicity.

In order to continue with Hit Confirmation assays, CO-ADD requests (as per the standard T&C's) that chemical structures of the compound/s (both active and inactive) be supplied after receipt of the primary screening report. All structural information will be kept confidential and only used internally by CO-ADD for the purpose of evaluating novelty of the chemistry to choose compounds for further validation. No publication will result without your written consent.

If possible, please provide structures as **smiles**, **sdf/sd** or **cdx** files. If you do not have this means, images may also be accepted. Once we have received your structures, we will schedule the dose response assay of the active compound.

If you have not already provided structures to CO-ADD for your full compound set, please do so within a reasonable timeframe after receiving this report, so as not to delay Hit Confirmation.

### 1.5 Publishing CO-ADD data

If you wish to publish data provided by CO-ADD, we kindly ask that you acknowledge CO-ADD appropriately with the following reference:

Helping Chemists Discover New Antibiotics

M.A. Blaskovich, J. Zuegg, A.G. Elliott, M.A. Cooper  
*ACS Infect. Dis.*, **2015**, 1(7), 285-287.

DOI: [10.1021/acsinfecdis.5b00044](https://doi.org/10.1021/acsinfecdis.5b00044); PMID: [27622818](https://pubmed.ncbi.nlm.nih.gov/27622818/)

as well as an acknowledgement for the funding of CO-ADD:

*“The antimicrobial screening performed by CO-ADD (The Community for Antimicrobial Drug Discovery) was funded by the Wellcome Trust (UK) and The University of Queensland (Australia).”*

Please advise CO-ADD at your earliest convenience that you have used provided data for publication purposes. This information is extremely helpful in keeping track of the outputs from the CO-ADD initiative and supports the program in renewed funding

possibilities to continue CO-ADD as a free screening service available to the academic community.

CO-ADD also asks, that where possible you publish your data in an Open Access journals.

## 2.0 Methods

### 2.1 Sample preparation

Samples were provided by the collaborator and stored frozen at -20 °C. Samples were prepared in DMSO and water to a final testing concentration of 32 µg/mL or 20 µM (unless otherwise indicated in the data sheet), in 384-well, non-binding surface plate (NBS) for each bacterial/fungal strain, and in duplicate (n=2), and keeping the final DMSO concentration to a maximum of 1% DMSO. All the sample-preparation were done using liquid handling robots.

Compounds that showed solubility issues during stock solution preparation are detailed in the data sheet.

### 2.2 Antimicrobial Assay

#### 2.2.1 Procedure

All bacteria were cultured in Cation-adjusted Mueller Hinton broth (**CAMHB**) at 37 °C overnight. A sample of each culture was then diluted 40-fold in fresh broth and incubated at 37 °C for 1.5-3 h. The resultant mid-log phase cultures were diluted (CFU/mL measured by OD<sub>600</sub>), then added to each well of the compound containing plates, giving a cell density of 5 × 10<sup>5</sup> CFU/mL and a total volume of 50 µL. All the plates were covered and incubated at 37 °C for 18 h without shaking.

#### 2.2.2 Analysis

Inhibition of bacterial growth was determined measuring absorbance at 600 nm (OD<sub>600</sub>), using a Tecan M1000 Pro monochromator plate reader. The percentage of growth inhibition was calculated for each well, using the negative control (media only) and positive control (bacteria without inhibitors) on the same plate as references. The significance of the inhibition values was determined by modified Z-scores, calculated using the median and MAD of the samples (no controls) on the same plate. Samples

with inhibition value above 80% and Z-Score above 2.5 for either replicate (n=2 on different plates) were classed as actives. Samples with inhibition values between 50 - 80% and Z-Score above 2.5 for either replicate (n=2 on different plates) were classed as partial actives. Samples with inhibition values between 50 - 80% and Z-Score above 2.5 for either replicate (n=2 on different plates) were classed as partial actives.

### 2.3 Antifungal Assay

#### 2.3.1 Procedure

Fungi strains were cultured for 3 days on Yeast Extract-Peptone Dextrose (YPD) agar at 30 °C. A yeast suspension of  $1 \times 10^6$  to  $5 \times 10^6$  CFU/mL (as determined by OD<sub>530</sub>) was prepared from five colonies. The suspension was subsequently diluted and added to each well of the compound-containing plates giving a final cell density of fungi suspension of  $2.5 \times 10^3$  CFU/mL and a total volume of 50 µL. All plates were covered and incubated at 35 °C for 24 h without shaking.

#### 2.3.2 Analysis

Growth inhibition of *C. albicans* was determined measuring absorbance at 530 nm (OD<sub>530</sub>), while the growth inhibition of *C. neoformans* was determined measuring the difference in absorbance between 600 and 570 nm (OD<sub>600-570</sub>), after the addition of resazurin (0.001% final concentration) and incubation at 35 °C for additional 2 h. The absorbance was measured using a Biotek Synergy HTX plate reader. The percentage of growth inhibition was calculated for each well, using the negative control (media only) and positive control (fungi without inhibitors) on the same plate. The significance of the inhibition values was determined by modified Z-scores, calculated using the median and MAD of the samples (no controls) on the same plate. Samples with inhibition value above 80% and Z-Score above 2.5 for either replicate (n=2 on different plates) were classed as actives. Samples with inhibition values between 50 - 80% and Z-Score above 2.5 for either replicate (n=2 on different plates) were classed as partial actives.

### 2.4 Antibiotic standards preparation and Quality control

Colistin and Vancomycin were used as positive bacterial inhibitor standards for Gram-negative and Gram-positive bacteria, respectively. Fluconazole was used as a positive fungal inhibitor standard for *C. albicans* and *C. neoformans*.



The antibiotics were provided in 4 concentrations, with 2 above and 2 below its MIC value, and plated into the first 8 wells of column 23 of the 384-well NBS plates.

The quality control (QC) of the assays was determined by the antimicrobial controls and the Z'-factor (using positive and negative controls). Each plate was deemed to fulfil the quality criteria (pass QC), if the Z'-factor was above 0.4, and the antimicrobial standards showed full range of activity, with full growth inhibition at their highest concentration, and no growth inhibition at their lowest concentration.

### 3.0 Materials

#### 3.1 Assay materials

| <i>Material</i>                               | <i>Code</i> | <i>Brand</i>       | <i>Cat No.</i> |
|-----------------------------------------------|-------------|--------------------|----------------|
| Compound preparation plate<br>[Polypropylene] | PP          | Corning            | 3364           |
| Assay Plates [Non-binding<br>surface]         | NBS 384w    | Corning            | 3640           |
| Growth media - bacteria                       | CAMHB       | Bacto Laboratories | 212322         |
| Culture agar - fungi                          | YPD         | Becton Dickinson   | 242720         |
| Growth media - fungi                          | YNB         | Becton Dickinson   | 233520         |
| Resazurin                                     |             | Sigma-Aldrich      | R7017          |

#### 3.2 Standards

| <i>Sample Name</i> | <i>Sample ID</i> | <i>Full<br/>MW</i> | <i>Stock<br/>Conc.<br/>(mg/mL)</i> | <i>Solvent</i> | <i>Source</i> |
|--------------------|------------------|--------------------|------------------------------------|----------------|---------------|
| Colistin - Sulfate | MCC_000094:02    | 1400.63            | 10.0                               | DMSO           | Sigma; C4461  |
| Vancomycin - HCL   | MCC_000095:02    | 1485.71            | 10.0                               | DMSO           | Sigma; 861987 |
| Fluconazole        | MCC_008383:01    | 306.27             | 2.56                               | DMSO           | Sigma; F8929  |

#### 3.3 Microbial Strains

| <i>ID</i> | <i>Batch</i> | <i>Organism</i>                | <i>Strain</i> | <i>Description</i>     |
|-----------|--------------|--------------------------------|---------------|------------------------|
| GN_001    | 02           | <i>Escherichia coli</i>        | ATCC 25922    | FDA control strain     |
| GN_003    | 02           | <i>Klebsiella pneumoniae</i>   | ATCC 700603   | MDR                    |
| GN_034    | 02           | <i>Acinetobacter baumannii</i> | ATCC 19606    | Type strain            |
| GN_042    | 02           | <i>Pseudomonas aeruginosa</i>  | ATCC 27853    | Quality control strain |
| GP_020    | 02           | <i>Staphylococcus aureus</i>   | ATCC 43300    | MRSA                   |
| FG_001    | 01           | <i>Candida albicans</i>        | ATCC 90028    | CLSI reference         |
| FG_002    | 01           | <i>Cryptococcus neoformans</i> | ATCC 208821   | H99 - Type strain      |

#### 4.0 Controls

All antibiotic and antifungal controls displayed inhibitory values within the expected range. For further information please contact the CO-ADD team at [support@co-add.org](mailto:support@co-add.org).

| <i>Strain ID</i> | <i>Species</i>             | <i>Antibiotic</i> | <i>Pass/Fail</i> |
|------------------|----------------------------|-------------------|------------------|
| GN_001:02        | <i>E. coli</i>             | Colistin          | Pass             |
| GN_003:02        | <i>K. pneumoniae</i> (MDR) | Colistin          | Pass             |
| GN_034:02        | <i>A. baumannii</i>        | Colistin          | Pass             |
| GN_042:02        | <i>P. aeruginosa</i>       | Colistin          | Pass             |
| GP_020:02        | <i>S. aureus</i> (MRSA)    | Vancomycin        | Pass             |
| FG_001:01        | <i>C. albicans</i>         | Fluconazole       | Pass             |
| FG_002:01        | <i>C. neoformans</i> (H99) | Fluconazole       | Pass             |

#### 4.1 Antimicrobial susceptibility of tested strains

Values are the average of  $\geq 6$  independent biological replicates. All values are within the expected range as per CLSI guidelines.

## 4.1.1 Antibiotic standards

| MIC determined by BMD method,<br>CA-MHB, Corning 3640 384 NBS<br>plates |               | GN_001:02               | GN_003:02                    | GN_034:02                                  | GN_042:02                     |
|-------------------------------------------------------------------------|---------------|-------------------------|------------------------------|--------------------------------------------|-------------------------------|
|                                                                         |               | <i>Escherichia coli</i> | <i>Klebsiella pneumoniae</i> | <i>Acinetobacter baumannii</i> Type strain | <i>Pseudomonas aeruginosa</i> |
|                                                                         |               | FDA Control             | ESBL                         |                                            | QC strain                     |
|                                                                         |               | ATCC 25922              | ATCC 700603                  | ATCC 19606                                 | ATCC 27853                    |
| Compound                                                                | Compound Type | MIC (µg/mL)             |                              |                                            |                               |
| Colistin - sulfate                                                      | Antibiotic    | <b>0.125</b>            | <b>0.25</b>                  | <b>0.25</b>                                | <b>0.25</b>                   |

| MIC determined by BMD method,<br>CA-MHB, Corning 3640 384 NBS<br>plates |               | GP_020:02                    |
|-------------------------------------------------------------------------|---------------|------------------------------|
|                                                                         |               | <i>Staphylococcus aureus</i> |
|                                                                         |               | MRSA                         |
|                                                                         |               | ATCC 43300                   |
| Compound                                                                | Compound Type | MIC (µg/mL)                  |
| Vancomycin - HCl                                                        | Antibiotic    | <b>1</b>                     |

## 4.1.2 Antifungal standard

| MIC determined by BMD method,<br>YNB, Corning 3640 384 NBS plates |               | FG_001:02               | FG_002:02                          |
|-------------------------------------------------------------------|---------------|-------------------------|------------------------------------|
|                                                                   |               | <i>Candida albicans</i> | <i>Cryptococcus neoformans H99</i> |
|                                                                   |               | CLSI reference          | Type strain                        |
|                                                                   |               | ATCC 90028              | ATCC 208821                        |
| Compound                                                          | Compound Type | MIC (µg/mL)             |                                    |
| Fluconazole                                                       | Antifungal    | <b>0.125</b>            | <b>8</b>                           |

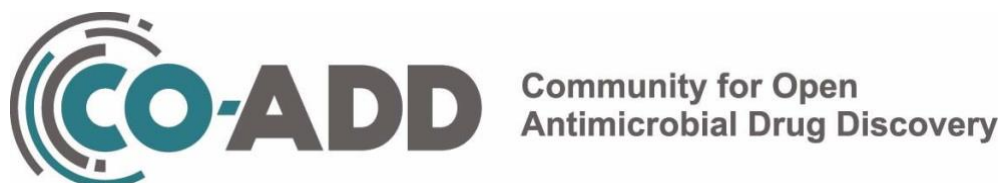

## Hit-Confirmation

# Antimicrobial screening, Cytotoxicity & Haemolysis

### *Procedure and Materials*

## 1.0 Summary

## 1.1 Study

Hit Confirmation of active compounds by whole cell growth inhibition assays was conducted as an 8-point dose response to determine the Minimum Inhibitory Concentration (MIC), in duplicate (n=2). The inhibition of growth is measured against those microorganisms that showed susceptibility to the compounds tested in the Primary Screen.

Included in the Hit Confirmation were 5 bacteria: *Escherichia coli*, *Klebsiella pneumoniae*, *Acinetobacter baumannii*, *Pseudomonas aeruginosa* and *Staphylococcus aureus*, and 2 fungi *Candida albicans* and *Cryptococcus neoformans*.

In addition to determining MIC, active compounds were counter screened for cytotoxicity against a human embryonic kidney cell line, HEK293, by determining their CC<sub>50</sub> value. The compounds were also screened for haemolysis of human red blood cells.

## 1.2 Assay Parameters

| Assay Parameters          | Bacteria                                         | Fungi                                                   | HEK293                                                | Haemolysis                                                     |
|---------------------------|--------------------------------------------------|---------------------------------------------------------|-------------------------------------------------------|----------------------------------------------------------------|
| <b>Test concentration</b> | 32 - 0.25 µg/mL or<br>20 – 0.15 µM<br>≤0.5% DMSO | 32 - 0.25 µg/mL or<br>20 – 0.15 µM<br>≤0.5% DMSO        | 32 - 0.25 µg/mL or<br>20 – 0.15 µM<br>≤0.5% DMSO      | 32 - 0.25 µg/mL or<br>20 – 0.15 µM<br>≤0.5% DMSO               |
| <b>QC</b>                 | Duplicate (n=2)<br>Control MIC:<br>Pass          | Duplicate (n=2)<br>Control MIC:<br>Pass                 | Duplicate (n=2)<br>Control CC <sub>50</sub> :<br>Pass | Duplicate (n=2)<br>Control HC <sub>10</sub> :<br>Pass          |
| <b>Plates</b>             | Non-Binding<br>Surface (NBS),<br>384-well plate  | Non-Binding<br>Surface (NBS),<br>384-well plate         | TC, 384-well<br>black wall/clear<br>bottom            | Polypropylene<br>384-well and<br>polystyrene<br>384well plates |
| <b>Media</b>              | Cation-adjusted<br>Mueller Hinton<br>broth       | Yeast Nitrogen<br>Base                                  | DMEM<br>supplemented<br>with 10% FBS                  | 0.9% NaCl                                                      |
| <b>Read Out</b>           | OD <sub>600</sub>                                | OD <sub>630</sub><br>Resazurin<br>OD <sub>600-570</sub> | Resazurin<br>F <sub>560/590</sub>                     | OD <sub>405</sub>                                              |

### 1.3 Outcomes

Hit Confirmation outcomes are detailed in individual Project reports, personalised for each Project Submission for each CO-ADD user.

Please see your data sheet with file extension **P0XXX\_HC\_data.xlsx**, for example CO-ADD Project **P0100**, **P0100\_HC\_data.xlsx**

### 1.4 Structural Novelty

As per the T&C's of CO-ADD, structures for all submitted compounds for antimicrobial screening should be disclosed to CO-ADD following Primary Screening. Without structures for all submitted compounds, Hit Confirmation assays will not be triggered.

If you have not already done so, please **provide CO-ADD with the chemical structure** of the full sample set in this study (both for compounds showing activity and those that do not), which will allow CO-ADD to filter out future samples with the same, or highly similar structure. In addition, please **notify CO-ADD** if you agree to publish the data (*i.e.* structures and activity) in the public bioactive database ChEMBL ([www.ebi.ac.uk/chembl/](http://www.ebi.ac.uk/chembl/)). CO-ADD aims to increase the public knowledge of antimicrobial research, including data about non-active compounds.

All confirmed hits, without cytotoxicity or haemolytic activity, will be considered for further HitValidation, after a detailed analysis of structure-activity relationship and antimicrobial novelty, within CO-ADD samples, as well as, within public antimicrobial activity databases, like ChEMBL ([www.ebi.ac.uk/chembl/](http://www.ebi.ac.uk/chembl/)).

### 1.5 Publishing CO-ADD Data

If you wish to publish data provided by CO-ADD, we kindly ask that you acknowledge CO-ADD appropriately with the following reference:

Helping Chemists Discover New Antibiotics

M.A. Blaskovich, J. Zuegg, A.G. Elliott, M.A. Cooper  
*ACS Infect. Dis.*, **2015**, 1(7), 285-287.

DOI: [10.1021/acsinfecdis.5b00044](https://doi.org/10.1021/acsinfecdis.5b00044); PMID: [27622818](https://pubmed.ncbi.nlm.nih.gov/27622818/)

as well as an acknowledgement for the funding of CO-ADD:

*“The antimicrobial screening performed by CO-ADD (The Community for Antimicrobial Drug Discovery) was funded by the Wellcome Trust (UK) and The University of Queensland (Australia).”*

Please advise CO-ADD at your earliest convenience that you have used provided data for publication purposes. This information is extremely helpful in keeping track of the outputs from the CO-ADD initiative and supports the program in renewed funding possibilities to continue CO-ADD as a free screening service available to the academic community.

CO-ADD also asks, that where possible you publish your data in an Open Access journals.

## 2.0 Methods

### 2.1 Sample Preparation

Samples were provided by the collaborator and stored frozen at -20 °C. Samples were prepared in DMSO and water to a final testing concentration of 32 µg/mL or 20 µM (unless otherwise indicated in the data sheet) and serially diluted 1:2 fold for 8 times. Each sample concentration was prepared in 384-well plates, non-binding surface plate (**NBS**; Corning 3640) for each bacterial/fungal strain, tissue-culture treated (**TC-treated**; Corning 3712/3764) black for mammalian cell types and polypropylene 384-well (**PP**; Corning 3657) for haemolysis assays, all in duplicate (n=2), and keeping the final DMSO concentration to a maximum of 0.5%. All the sample preparation was done using liquid handling robots.

Compounds that showed notable solubility issues during stock solution preparation are detailed in the **Data sheet** for the individual Project.

### 2.2 Antibacterial Assay

#### 2.2.1 Procedure

All bacteria were cultured in Cation-adjusted Mueller Hinton broth (**CAMHB**) at 37 °C overnight. A sample of each culture was then diluted 40-fold in fresh broth and incubated at 37 °C for 1.5-3 h. The resultant mid-log phase cultures were diluted (CFU/mL measured by OD<sub>600</sub>), then added to each well of the compound containing

plates, giving a cell density of  $5 \times 10^5$  CFU/mL and a total volume of 50  $\mu$ L. All the plates were covered and incubated at 37 °C for 18 h without shaking.

### 2.2.2 Analysis

Inhibition of bacterial growth was determined measuring absorbance at 600 nm ( $OD_{600}$ ), using a Tecan M1000 Pro monochromator plate reader. The percentage of growth inhibition was calculated for each well, using the negative control (media only) and positive control (bacteria without inhibitors) on the same plate as references.

The percentage of growth inhibition was calculated for each well, using the negative control (media only) and positive control (bacteria without inhibitors) on the same plate. The MIC was determined as the lowest concentration at which the growth was fully inhibited, defined by an inhibition  $\geq 80\%$ . In addition, the maximal percentage of growth inhibition is reported as  $D_{Max}$ , indicating any compounds with partial activity.

Hits were classified by  $MIC \leq 16 \mu\text{g/mL}$  or  $MIC \leq 10 \mu\text{M}$  in either replicate ( $n=2$  on different plates).

## 2.3 Antifungal Assay

### 2.3.1 Procedure

Fungi strains were cultured for 3 days on Yeast Extract-Peptone Dextrose (**YPD**) agar at 30 °C. A yeast suspension of  $1 \times 10^6$  to  $5 \times 10^6$  CFU/mL (as determined by  $OD_{530}$ ) was prepared from five colonies. The suspension was subsequently diluted and added to each well of the compound-containing plates giving a final cell density of fungi suspension of  $2.5 \times 10^3$  CFU/mL and a total volume of 50  $\mu$ L. All plates were covered and incubated at 35 °C for 36 h without shaking.

### 2.3.2 Analysis

Growth inhibition of *C. albicans* was determined measuring absorbance at 630 nm ( $OD_{630}$ ), while the growth inhibition of *C. neoformans* was determined measuring the difference in absorbance between 600 and 570 nm ( $OD_{600-570}$ ), after the addition of resazurin (0.001% final concentration) and incubation at 35 °C for 2 h. The absorbance was measured using a Biotek Multiflo Synergy HTX plate reader.



In both cases, the percentage of growth inhibition was calculated for each well, using the negative control (media only) and positive control (fungi without inhibitors) on the same plate. The MIC was determined as the lowest concentration at which the growth was fully inhibited, defined by an inhibition  $\geq 80\%$  for *C. albicans* and an inhibition  $\geq 70\%$  for *C. neoformans*. Due to a higher variance in growth and inhibition, a lower threshold was applied to the data for *C. neoformans*. In addition, the maximal percentage of growth inhibition is reported as  $D_{Max}$ , indicating any compounds with marginal activity.

Hits were classified by  $MIC \leq 16 \mu\text{g/mL}$  or  $MIC \leq 10 \mu\text{M}$  in either replicate (n=2 on different plates).

## 2.4 Cytotoxicity Assay

### 2.4.1 Procedure

HEK293 cells were counted manually in a Neubauer haemocytometer and then plated in the 384-well plates containing the compounds to give a density of 5000 cells/well in a final volume of 50  $\mu\text{L}$ . **DMEM** supplemented with **10% FBS** was used as growth media and the cells were incubated together with the compounds for 20 h at 37 °C in 5%  $\text{CO}_2$ .

### 2.4.2 Analysis

Cytotoxicity (or cell viability) was measured by fluorescence, ex: 560/10 nm, em: 590/10 nm ( $F_{560/590}$ ), after addition of 5  $\mu\text{L}$  of 25  $\mu\text{g/mL}$  resazurin (2.3  $\mu\text{g/mL}$  final concentration) and after incubation for further 3 h at 37 °C in 5%  $\text{CO}_2$ . The fluorescence intensity was measured using a Tecan M1000 Pro monochromator plate reader, using automatic gain calculation.

$CC_{50}$  (concentration at 50% cytotoxicity) were calculated by curve fitting the inhibition values vs. log(concentration) using a sigmoidal dose-response function, with variable fitting values for bottom, top and slope. In addition, the maximal percentage of cytotoxicity is reported as  $D_{Max}$ , indicating any compounds with partial cytotoxicity.

The curve fitting was implemented using Pipeline Pilot's dose-response component, resulting in similar values to curve fitting tools such as GraphPad's Prism and IDBS's XIFit. Any value with > indicate sample with no activity (low  $D_{Max}$  value) or samples with  $CC_{50}$  values above the maximum tested concentration (higher  $D_{Max}$  value).

Cytotoxic samples were classified by  $CC_{50} \leq 32 \mu\text{g/mL}$  or  $CC_{50} \leq 10 \mu\text{M}$  in either replicate ( $n=2$  on different plates). In addition, samples were flagged as partial cytotoxic if  $D_{\text{Max}} \geq 50\%$ , even with  $CC_{50} >$  the maximum tested concentration.

## 2.5 Haemolysis Assay

### 2.5.1 Procedure

Human whole blood was washed three times with 3 volumes of 0.9% NaCl and then resuspended in same to a concentration of  $0.5 \times 10^8$  cells/mL, as determined by manual cell count in a Neubauer haemocytometer. The washed cells were then added to the 384-well compound-containing plates for a final volume of 50  $\mu\text{L}$ . After a 10 min shake on a plate shaker the plates were then incubated for 1 h at 37 °C. After incubation, the plates were centrifuged at 1000g for 10 min to pellet cells and debris, 25  $\mu\text{L}$  of the supernatant was then transferred to a polystyrene 384-well assay plate.

### 2.5.2 Analysis

Haemolysis was determined by measuring the supernatant absorbance at 405 nm ( $OD_{405}$ ). The absorbance was measured using a Tecan M1000 Pro monochromator plate reader.

$HC_{10}$  and  $HC_{50}$  (concentration at 10% and 50% haemolysis, respectively) were calculated by curve fitting the inhibition values vs.  $\log(\text{concentration})$  using a sigmoidal dose-response function with variable fitting values for top, bottom and slope. In addition, the maximal percentage of haemolysis is reported as  $D_{\text{Max}}$ , indicating any compounds with partial haemolysis.

The curve fitting was implemented using Pipeline Pilot's dose-response component, resulting in similar values to curve fitting tools such as GraphPad's Prism and IDBS's XIFit. Any value with  $>$  indicate sample with no activity (low  $D_{\text{Max}}$  value) or samples with  $HC_{10}$  values above the maximum tested concentration (higher  $D_{\text{Max}}$  value).

Haemolysis samples were classified by  $HC_{10} \leq 32 \mu\text{g/mL}$  or  $HC_{10} \leq 10 \mu\text{M}$  in either replicate ( $n=2$  on different plates). In addition, samples were flagged as partial haemolytic if  $D_{\text{Max}} \geq 50\%$ , even with  $HC_{10} >$  the maximum tested concentration.

## 2.6 Antibiotic, Cytotoxic and Haemolytic Standards Preparation and Quality Control

Colistin and Vancomycin were used as positive bacterial inhibitor standards for Gram-negative and Gram-positive bacteria, respectively. Fluconazole was used as a positive fungal inhibitor standard for *C. albicans* and *C. neoformans*. Tamoxifen was used as a positive cytotoxicity standard. Melittin was used as a positive haemolytic standard.

Each antibiotic standard was provided in 4 concentrations, with 2 above and 2 below its MIC or CC<sub>50</sub> value, and plated into the first 8 wells of column 23 of the 384-well NBS plates. Tamoxifen and melittin was used in 8 concentrations in 2 fold serial dilutions with 50 µg/mL highest concentration.

The quality control (QC) of the assays was determined by Z'-Factor, calculated from the Negative (media only) and Positive Controls (bacterial, fungal or cell culture without inhibitor), and the Standards. Plates with a Z'-Factor of  $\geq 0.4$  and Standards active at the highest and inactive at the lowest concentration, were accepted for further data analysis.

### 3.0 Materials

#### 3.1 Assay Materials

| <i>Material</i>                                       | <i>Code</i>             | <i>Brand/Supplier</i> | <i>Cat No.</i> |
|-------------------------------------------------------|-------------------------|-----------------------|----------------|
| Compound preparation plate, Polypropylene             | PP                      | Corning               | 3364           |
| Assay Plates – Antimicrobial<br>Non-binding surface   | NBS 384w                | Corning               | 3640           |
| Assay Plates – Cytotoxicity<br>Tissue culture treated | Black/Clear bottom 384w | Corning               | 3712           |
| Assay Plates - Haemolysis                             | PP-Haem                 | Corning               | 3657           |
| Reading Plates - Haemolysis                           | Clear 384w              | Corning               | 3680           |
| Growth media - bacteria                               | CAMHB                   | Bacto Laboratories    | 212322         |
| Culture agar - fungi                                  | YPD                     | Becton Dickinson      | 242720         |
| Growth media - fungi                                  | YNB                     | Becton Dickinson      | 233520         |
| Resazurin                                             |                         | Sigma-Aldrich         | R7017          |
| Dulbecco's Modified Eagle Medium                      | DMEM                    | Life Technologies     | 11995-073      |

|                     |        |         |          |
|---------------------|--------|---------|----------|
| Foetal Bovine Serum | FBS    | Bovogen | FFBS-500 |
| 0.9% NaCl           | Saline | Baxter  | AHF7124  |

### 3.2 Standards

| Sample Name        | Sample ID     | Full MW | Stock Conc. (mg/mL) | Solvent | Source        |
|--------------------|---------------|---------|---------------------|---------|---------------|
| Colistin - Sulfate | MCC_000094:02 | 1400.63 | 10.0                | DMSO    | Sigma; C4461  |
| Vancomycin - HCL   | MCC_000095:02 | 1485.71 | 10.0                | DMSO    | Sigma; 861987 |
| Fluconazole        | MCC_008383:01 | 306.27  | 2.56                | DMSO    | Sigma; F8929  |
| Tamoxifen          | MCC_000096:01 | 371.50  | 10                  | DMSO    | Sigma; T5648  |
| Melittin           | MCC_008868:02 | 2846.46 | 10                  | Water   | Sigma; M2272  |

### 3.3 Microbial strains and cell lines

| ID     | Batch | Organism                                   | Strain           | Description            |
|--------|-------|--------------------------------------------|------------------|------------------------|
| GN_001 | 02    | <i>Escherichia coli</i>                    | ATCC 25922       | FDA control strain     |
| GN_003 | 02    | <i>Klebsiella pneumoniae</i>               | ATCC 700603      | MDR                    |
| GN_034 | 02    | <i>Acinetobacter baumannii</i>             | ATCC 19606       | Type strain            |
| GN_042 | 02    | <i>Pseudomonas aeruginosa</i>              | ATCC 27853       | Quality control strain |
| GP_020 | 02    | <i>Staphylococcus aureus</i>               | ATCC 43300       | MRSA                   |
| FG_001 | 01    | <i>Candida albicans</i>                    | ATCC 90028       | CLSI reference         |
| FG_002 | 01    | <i>Cryptococci neoformans</i>              | ATCC 208821      | H99, Type strain       |
| MA_007 | 02    | <i>Homo sapiens</i> embryonic kidney cells | ATCC CRL-1573    | HEK 293                |
| HA_150 | -     | <i>Homo sapiens</i>                        | ARCBS 5400 00150 | Whole blood            |

### 4.0 Controls

#### 4.1 Antimicrobial susceptibility of tested strains

Values are the average of  $\geq 6$  independent biological replicates. All values are within the expected range as per CLSI guidelines.

## 4.1.1 Antibiotic standards

|                                                                         |  |                                                                          |                                                                          |                                                                                 |                                                                              |             |
|-------------------------------------------------------------------------|--|--------------------------------------------------------------------------|--------------------------------------------------------------------------|---------------------------------------------------------------------------------|------------------------------------------------------------------------------|-------------|
| MIC determined by BMD method,<br>CA-MHB, Corning 3640 384 NBS<br>plates |  | <b>GN_001:02</b><br><i>Escherichia coli</i><br>FDA Control<br>ATCC 25922 | <b>GN_003:02</b><br><i>Klebsiella pneumophila</i><br>ESBL<br>ATCC 700603 | <b>GN_034:02</b><br><i>Acinetobacter baumannii</i> Type<br>strain<br>ATCC 19606 | <b>GN_042:02</b><br><i>Pseudomonas aeruginosa</i><br>QC strain<br>ATCC 27853 |             |
|                                                                         |  | Compound                                                                 | Compound Type                                                            | MIC (µg/mL)                                                                     |                                                                              |             |
|                                                                         |  | Colistin - sulfate                                                       | Antibiotic                                                               | <b>0.125</b>                                                                    | <b>0.25</b>                                                                  | <b>0.25</b> |

|                                                                         |  |                                                                        |               |             |
|-------------------------------------------------------------------------|--|------------------------------------------------------------------------|---------------|-------------|
| MIC determined by BMD method,<br>CA-MHB, Corning 3640 384 NBS<br>plates |  | <b>GP_020:02</b><br><i>Staphylococcus aureus</i><br>MRSA<br>ATCC 43300 |               |             |
|                                                                         |  | Compound                                                               | Compound Type | MIC (µg/mL) |
|                                                                         |  | Vancomycin - HCl                                                       | Antibiotic    | <b>1</b>    |

## 4.1.2 Antifungal standard

|                                                                      |  |                                                                             |                                                                                      |              |
|----------------------------------------------------------------------|--|-----------------------------------------------------------------------------|--------------------------------------------------------------------------------------|--------------|
| MIC determined by BMD method,<br>YNB, Corning 3640 384 NBS<br>plates |  | <b>FG_001:02</b><br><i>Candida albicans</i><br>CLSI reference<br>ATCC 90028 | <b>FG_002:02</b><br><i>Cryptococcus neoformans H99</i><br>Type strain<br>ATCC 208821 |              |
|                                                                      |  | Compound                                                                    | Compound Type                                                                        | MIC (µg/mL)  |
|                                                                      |  | Fluconazole                                                                 | Antifungal                                                                           | <b>0.125</b> |

## 4.2 Susceptibility profile of cell lines

| Values are the average of > 6 independent biological replicates. CC <sub>50</sub> is the concentration at 50% cytotoxicity. |               | MA_007<br>HEK293<br>ATCC CRL-1573 |            |
|-----------------------------------------------------------------------------------------------------------------------------|---------------|-----------------------------------|------------|
|                                                                                                                             |               | CC <sub>50</sub> (µg/mL)          |            |
| Compound                                                                                                                    | Compound Type | Average                           | Stdev      |
| Tamoxifen                                                                                                                   | PKC inhibitor | <b>9</b>                          | <b>2.2</b> |

## 4.3 Susceptibility profile of human washed red cells

| Values are the average of > 6 independent biological replicates. HC <sub>10</sub> and HC <sub>50</sub> are the concentrations at 10% and 50% haemolysis, respectively. |                    | HA_150<br>Human Whole blood<br>ARCBS 00150 |            |                          |            |
|------------------------------------------------------------------------------------------------------------------------------------------------------------------------|--------------------|--------------------------------------------|------------|--------------------------|------------|
|                                                                                                                                                                        |                    | HC <sub>10</sub> (µg/mL)                   |            | HC <sub>50</sub> (µg/mL) |            |
| Compound                                                                                                                                                               | Compound Type      | Average                                    | Stdev      | Average                  | Stdev      |
| Melittin                                                                                                                                                               | Haemolytic peptide | <b>2.7</b>                                 | <b>0.9</b> | <b>8.5</b>               | <b>2.5</b> |

## 4.4 Outcome

All standard compound controls displayed inhibitory values within the expected range for each assay type and each organism tested. For further information please contact the CO-ADD team at [support@co-add.org](mailto:support@co-add.org).

| Strain ID | Species                       | Standard positive inhibitor control | Pass/Fail |
|-----------|-------------------------------|-------------------------------------|-----------|
| GN_001:02 | <i>E. coli</i>                | Colistin                            | Pass      |
| GN_003:02 | <i>K. pneumoniae</i> (MDR)    | Colistin                            | Pass      |
| GN_034:02 | <i>A. baumannii</i>           | Colistin                            | Pass      |
| GN_042:02 | <i>P. aeruginosa</i>          | Colistin                            | Pass      |
| GP_020:02 | <i>S. aureus</i> (MRSA)       | Vancomycin                          | Pass      |
| FG_001:01 | <i>C. albicans</i>            | Fluconazole                         | Pass      |
| FG_002:01 | <i>C. neoformans</i> (H99)    | Fluconazole                         | Pass      |
| MA_007:02 | <i>Homo sapiens</i><br>HEK293 | Tamoxifen                           | Pass      |
| HA_150    | <i>Homo sapiens</i>           | Melittin                            | Pass      |

**Table 9S.** Percentage of growth inhibition ( $\pm 10\%$ ) of all tested bacteria and fungi in the presence of allene-derived metal complexes and allene ligands in the initial screening at 32  $\mu\text{g/ml}$  of the drug.

| Entry     | Compound    | G +ve                 |                     | G -ve                     |                           |                          | Yeast                   |                                              |
|-----------|-------------|-----------------------|---------------------|---------------------------|---------------------------|--------------------------|-------------------------|----------------------------------------------|
|           |             | <i>S. aureus</i> (Sa) | <i>E. coli</i> (Ec) | <i>K. pneumoniae</i> (Kp) | <i>P. aeruginosa</i> (Pa) | <i>A. baumannii</i> (Ab) | <i>C. albicans</i> (Ca) | <i>C. neoformans</i> var. <i>grubii</i> (Cn) |
| complexes | 1 <b>2a</b> | 89.50                 | 19.97               | 17.13                     | 1.78                      | 72.15                    | 98.92                   | 66.46                                        |
|           | 2 <b>2b</b> | 88.65                 | 48.49               | 26.24                     | 53.44                     | 92.24                    | 99.78                   | 73.68                                        |
|           | 3 <b>3a</b> | 33.08                 | -6.04               | 6.61                      | 2.90                      | 8.76                     | 71.29                   | -4.92                                        |
|           | 4 <b>3b</b> | 0.49                  | -2.56               | 17.84                     | 17.75                     | 21.87                    | 100.22                  | 0.49                                         |
|           | 5 <b>4a</b> | 91.03                 | 87.82               | 41.8                      | 90.52                     | 89.96                    | 100.22                  | 67.40                                        |
|           | 6 <b>4b</b> | 96.95                 | 96.12               | 97.27                     | 98.97                     | 95.9                     | 101.48                  | 72.16                                        |
| ligands   | 7 <b>1a</b> | 0.06                  | -3.91               | 4.43                      | 19.85                     | 6.66                     | 2.30                    | -3.13                                        |
|           | 8 <b>1b</b> | -2.65                 | -10.79              | 2.54                      | 13.19                     | 6.43                     | 1.56                    | -2.04                                        |

**Table 10S.** Minimum inhibitory concentration (MIC,  $\mu\text{g/mL}$ ) on all tested microorganisms, in a range of 0.25 - 32  $\mu\text{g/mL}$  of the drug (complexes **2-4**) concentration;  $\text{CC}_{50}$  (cytotoxicity,  $\mu\text{g/mL}$ ) with HEK-293 cells;  $\text{HC}_{10}$  (haemolytic activity,  $\mu\text{g/mL}$ ) with RBC cells.

| Entry     | Compound    | G +ve                 |                     | G -ve                     |                           |                          | Yeast                   |                                              | Human                               |                          |
|-----------|-------------|-----------------------|---------------------|---------------------------|---------------------------|--------------------------|-------------------------|----------------------------------------------|-------------------------------------|--------------------------|
|           |             | <i>S. aureus</i> (Sa) | <i>E. coli</i> (Ec) | <i>K. pneumoniae</i> (Kp) | <i>P. aeruginosa</i> (Pa) | <i>A. baumannii</i> (Ab) | <i>C. albicans</i> (Ca) | <i>C. neoformans</i> var. <i>grubii</i> (Cn) | Embryonic kidney cells HEK-293 (Hk) | Red blood cells RBC (Hm) |
| complexes | 1 <b>2a</b> | 2                     | >32                 | >32                       | >32                       | >32                      | 16                      | 1                                            | 0.9567                              | >32                      |
|           | 2 <b>2b</b> | $\leq 0.25$           | >32                 | >32                       | >32                       | 32                       | $\leq 0.25$             | $\leq 0.25$                                  | 1.066                               | >32                      |
|           | 3 <b>3b</b> | >32                   | >32                 | >32                       | >32                       | >32                      | 32                      | >32                                          | >32                                 | >32                      |
|           | 4 <b>4a</b> | 16                    | 32                  | >32                       | >32                       | >32                      | 4                       | 16                                           | >32                                 | >32                      |
|           | 5 <b>4b</b> | 16                    | $\leq 0.25$         | >32                       | >32                       | >32                      | 4                       | $\leq 0.25$                                  | >32                                 | $\leq 0.25$              |

## 7. Anticancer studies

Cell viability assays were performed using MDA-MB-231 human breast adenocarcinoma cells. The cells were routinely cultured in high glucose Dulbecco's Modified Eagle Medium (DMEM) phenol red-free medium supplemented with L-glutamine (1%), Fetal Bovine Serum (FBS, 10%) and sodium pyruvate (1 mM). The cells were subcultured (1:4 – 1:12) every 3-5 days, when they reached near confluence in 75 cm<sup>2</sup> Nunc Easy flasks. For chemosensitivity studies, stock solutions of bis(pyridyl)allenes **1a-b** and complexes **2-4** (20 mM) in DMSO (molecular biology grade) were prepared and further diluted with complete culture medium to obtain a range of desired concentrations. MDA-MB-231 cells were washed with PBS-B buffer, trypsinated and counted using a Neubauer haemocytometer. The cell suspension of concentration of  $2 \times 10^4$  cell/mL was prepared and used to seed a number of 96-well round bottom plates. Black bottom plates were used for CellTiter-Blue® assay and transparent plates were used for the MTT assay. Each well was filled with 100  $\mu$ L of cell suspension (2000 cells/well). The plates were incubated for 24 h at 37 °C at 5% CO<sub>2</sub>. After that time, 100  $\mu$ L of solution of the drug in complete culture medium was added to each experimental well giving a total of 200  $\mu$ L per well. Control wells were treated with 100  $\mu$ L of DMSO solution in complete culture media alone. Additionally, controls not containing cells were prepared (DMSO solution in complete culture medium, 200  $\mu$ L per well). Drug solutions were added so that the final DMSO concentration did not exceed 0.5% (v/v) and the same DMSO concentration was used across all the wells. The plates were incubated for 24 h at 37 °C at 5% CO<sub>2</sub>. **For CellTiter-Blue (CTB) assay**, after the corresponding incubation, 20  $\mu$ L of CTB reagent was added to each well and the plate was shaken for 10 s. The plate was returned to the incubator (37 °C, 5% CO<sub>2</sub>) for 4 h. The fluorescence emission intensity of the wells was then measured (excitation – 561 nm, emission – 594 nm). Background fluorescence was corrected by subtracting the average value of the fluorescence emission intensity of cell-free wells (media controls). **For MTT assay**, after the corresponding incubation, 20  $\mu$ L of a yellow MTT reagent (5 mg/mL in PBS-B buffer) was added to each well. The plate was returned to the incubator (37 °C, 5% CO<sub>2</sub>) for 3.5 h. The solution was then removed from each well with a pipette. 150  $\mu$ L of DMSO (molecular biology grade) was added to each well and the plate was shaken resulting in colourless to bright pink solutions. The absorbance intensity of each well was measured at 560 nm. Background absorbance was corrected by subtracting the average value of the absorbance intensity of cell-free wells (media controls).

Cell survival was calculated as a percentage of non-treated cells. The half maximal inhibitory concentration (IC<sub>50</sub>) values were determined from the plots of % cell survival vs. concentration.



The CTB assay was performed in technical triplicate; the MTT assay was performed in technical and experimental triplicate.

**Table 11S.** IC<sub>50</sub> values [ $\mu\text{M}$ ] ( $\pm$  SD for MTT) for MDA-MB-231 cell line (24 h incubation) of complexes **2-4** and bis(pyridyl)allenes **1-b** using CellTiter-Blue® and MTT assays.

|           | Entry | Compound  | IC <sub>50</sub> [ $\mu\text{M}$ ]<br>CTB | IC <sub>50</sub> [ $\mu\text{M}$ ]<br>MTT |
|-----------|-------|-----------|-------------------------------------------|-------------------------------------------|
| complexes | 1     | <b>2a</b> | 0.29                                      | 3.32 $\pm$ 1.22                           |
|           | 2     | <b>2b</b> | >100                                      | -                                         |
|           | 3     | <b>3a</b> | N/A <sup>a</sup>                          | -                                         |
|           | 4     | <b>3b</b> | >100                                      | -                                         |
|           | 5     | <b>4a</b> | 5.87                                      | 2.50 $\pm$ 1.63                           |
|           | 6     | <b>4b</b> | 66.12                                     | -                                         |
| ligands   | 7     | <b>1a</b> | >100                                      | -                                         |
|           | 8     | <b>1b</b> | >100                                      | -                                         |

<sup>a</sup> Lack of clear viability profile.

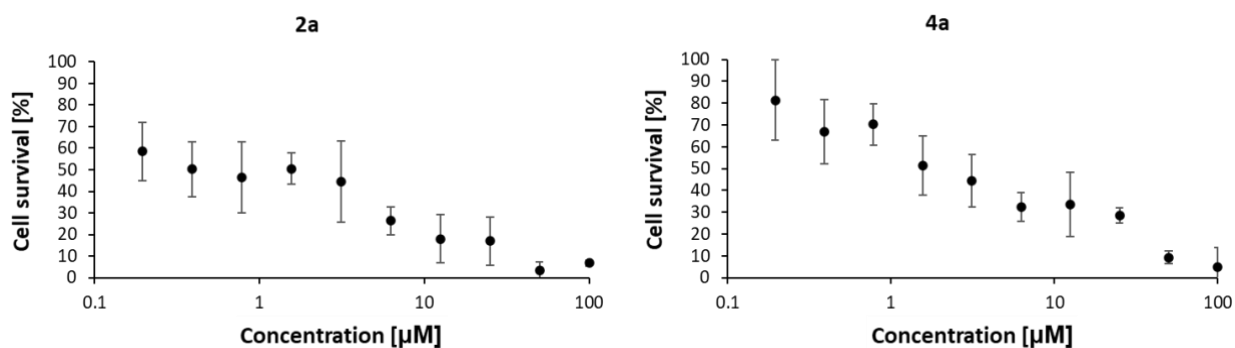

**Figure 7S.** MTT assay - viability of MDA-MB-231 cells treated with **2a** (left) and **4a** (right) after 24 h of incubation.

## 8. DNA studies

### 8.1. General experimental

Oligonucleotides were purchased from Eurogentec and were HPLC purified. Solid DNA samples were initially dissolved as a stock solution in purified water (1 mM); further dilutions were carried out in the respective sodium cacodylate buffer. Samples were thermally annealed in a heat block at 95 °C for 5 minutes and cooled slowly to room temperature overnight. Stock solution of the ligands were made at 10 mM in DMSO and was stored at -20 °C, subsequent dilutions were made in the appropriate buffer.

| Name            | Sequence 5'-3'                                                                                         |
|-----------------|--------------------------------------------------------------------------------------------------------|
| DS              | GGC-ATA-GTGCGT-GGG-CGT-TAG-C was annealed with its complementary sequence GCT-AAC-GCC-CACGCA-CTA-TGC-C |
| hTeloC          | TAA-CCC-TAA-CCC-TAA-CCC-TAA-CCC                                                                        |
| DAP             | CCC-CCG-CCC-CCG-CCC-CCG-CCC-CCG-CCC-CC                                                                 |
| hif-1- $\alpha$ | CGC-GCT-CCC-GCC-CCC-TCT-CCC-CTC-CCC-GCG-C                                                              |
| hTeloG          | GGG-TTA-GGG-TTA-GGG-TTA-GGG                                                                            |

### 8.2. FID assay

FID experiments were performed on a BMG CLARIOstar plate reader using Corning 96-Well Solid Black Flat Bottom plates. A 10 mM stock solution of TO was prepared in DMSO and dilution to 2  $\mu$ M in the appropriate buffer. 90  $\mu$ L of the 2  $\mu$ M TO solution were added to each well and the fluorescence emission at 450 nm was measured with excitation at 430 nm; this was normalised to 0% representing background fluorescence. 1  $\mu$ L of 90  $\mu$ M DNA was then added, shaken using 114 double orbital shaking at 700 rpm in the plate reader for 15 s, and allowed to equilibrate for 15 minutes. After equilibration, fluorescence emission was measured once again and normalised to 100% representing maximum fluorescence enhancement from the TO probe binding the DNA secondary structure. 0.9  $\mu$ L aliquots of ligand were titrated into each well (in triplicate) and measured as before. Fluorescence measurements after ligand addition were normalised between the 0 and 100% levels determined per the respective well. Percentage TO displacement was calculated as the difference between the normalised 100% fluorescence level and the normalised fluorescence measured after each ligand addition.

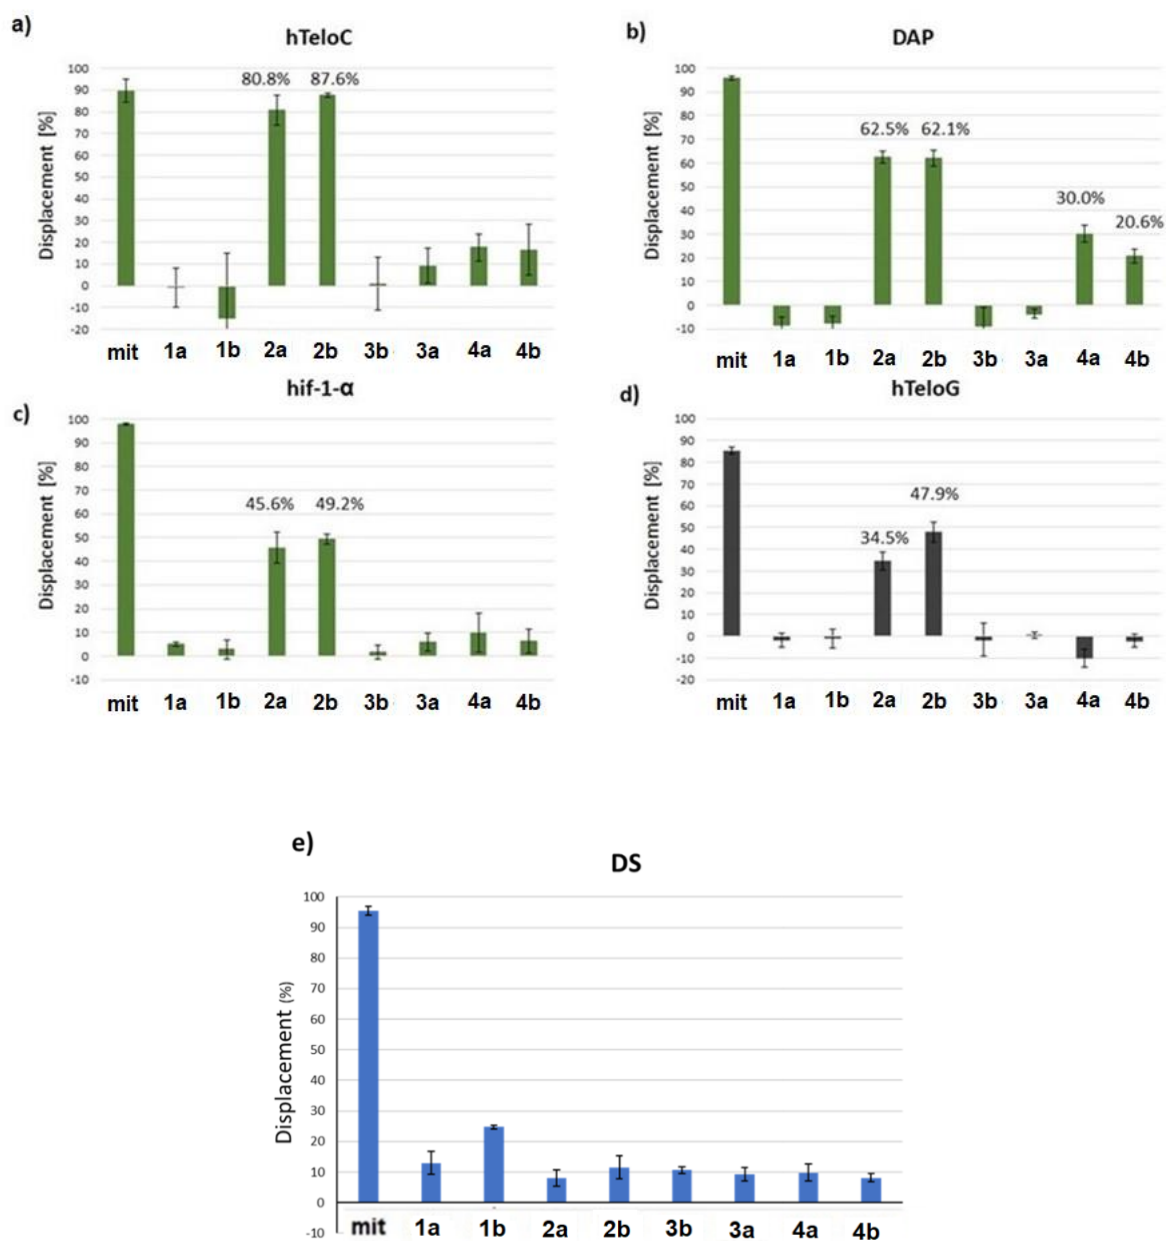

**Figure 8S.** TO displacement assay for allene ligands **1a-b** and allene-containing complexes at 2.5  $\mu\text{M}$  in 10 mM sodium cacodylate, 100 mM KCl: a) 0.5  $\mu\text{M}$  hTeloC, pH 5.5; b) 0.5  $\mu\text{M}$  DAP, pH 6.8; c) 0.5  $\mu\text{M}$  hif-1- $\alpha$ , pH 6.8; d) 0.5  $\mu\text{M}$  hTeloG, pH 7.0; e) 0.5  $\mu\text{M}$  DS, pH 7.0.

**Table 12S.** Summary of the FID results for allene ligands and allene-containing complexes. 0.5  $\mu$ M DNA and 2.5  $\mu$ M of compound in 10 mM sodium cacodylate, 100 mM KCl at pH 5.5 (hTeloC), 6.8 (hif-1- $\alpha$ , DAP) and pH 7.0 (hTeloG, DS).

| Entry | Compound  | Displacement [%] |        |                 |      |        |
|-------|-----------|------------------|--------|-----------------|------|--------|
|       |           | DS               | hTeloC | hif-1- $\alpha$ | DAP  | hTeloG |
| 1     | <b>1a</b> | 9.8              | -0.9   | 4.9             | -8.6 | -1.7   |
| 2     | <b>1b</b> | 8.1              | -14.8  | 2.8             | -7.4 | -1.1   |
| 3     | <b>2a</b> | 13.0             | 80.8   | 45.6            | 62.5 | 34.5   |
| 4     | <b>2b</b> | 24.7             | 87.6   | 49.2            | 62.1 | 47.9   |
| 5     | <b>3b</b> | 8.0              | 0.8    | 1.6             | -8.9 | -1.6   |
| 6     | <b>3a</b> | 11.5             | 9.2    | 5.9             | -3.6 | 0.7    |
| 7     | <b>4a</b> | 10.6             | 17.6   | 9.8             | 30.0 | -10.0  |
| 8     | <b>4b</b> | 9.3              | 16.5   | 6.2             | 20.6 | -2.1   |

### 8.3. CD-melting experiments

Circular dichroism was performed using a Jasco J-810 spectropolarimeter using a 1 mm path length quartz cuvette. Scans were performed with a scanning speed of 200 nm/min, response time of 1 s, 0.5 nm pitch and 2 nm bandwidth. The spectra are an accumulation of 3 or 4 scans and are zero corrected at 320 nm. Melting experiments were performed using the same measurement parameters while heating the sample at a rate of 1  $^{\circ}$ C/min within the desired temperature range and measuring a complete spectrum at 5  $^{\circ}$ C intervals. The temperature at which 50% of the thermal denaturation had taken place ( $T_m$ ) was calculated by plotting normalised ellipticity at 288 nm against temperature. These data were fitted with sigmoidal curves to give the  $T_m$  values. Examples of CD-melting curves for **2a** are shown in the Figure 9S - Figure 12S.

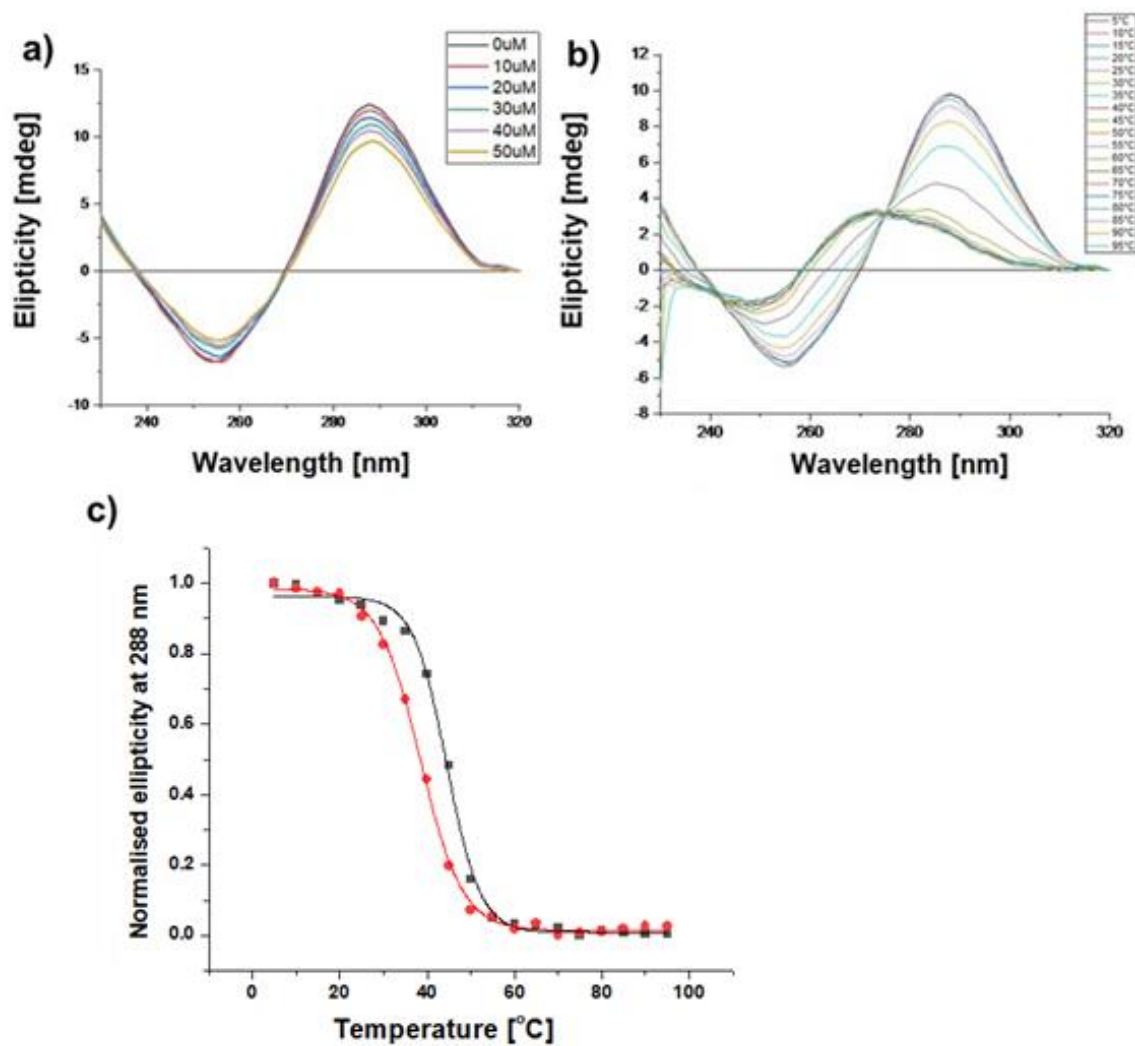

**Figure 9S.** CD experiments of 10  $\mu\text{M}$  hTeloC in 10 mM sodium cacodylate, 100 mM KCl, pH 5.5 with compound **2a**: a) titration with 0-50  $\mu\text{M}$  (0-5 eq) of **2a**; b) CD-melt with 50  $\mu\text{M}$  of **2a**; c) melting curve derived from the normalised ellipticity at 288 nm in the absence (black) and presence (red) of compound **2a**.

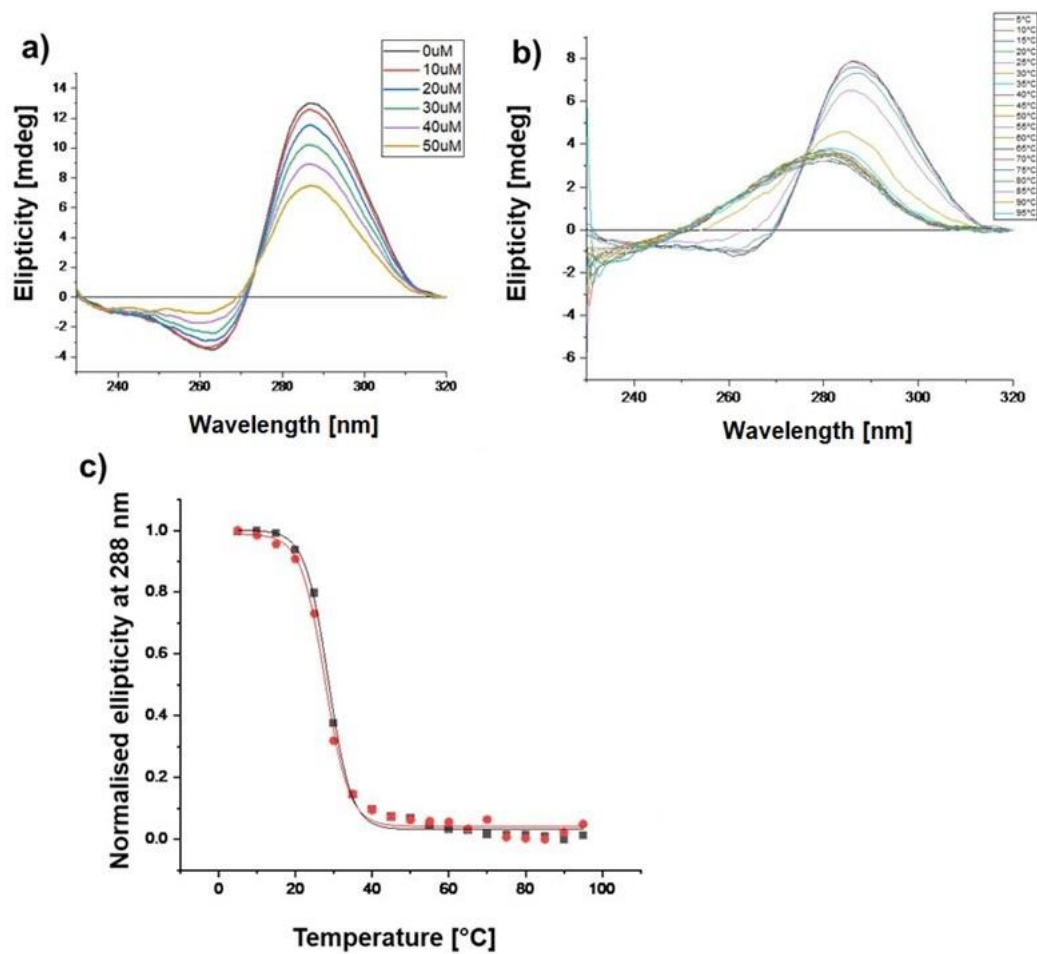

**Figure 10S.** CD experiments of 10  $\mu\text{M}$  DAP in 10 mM sodium cacodylate, 100 mM KCl, pH 6.8 with compound **2a**: a) titration with 0-50  $\mu\text{M}$  (0-5 eq) of **2a**; b) CD-melt with 50  $\mu\text{M}$  of **2a**; c) melting curve derived from the normalised ellipticity at 288 nm in the absence (black) and presence (red) or compound **2a**.

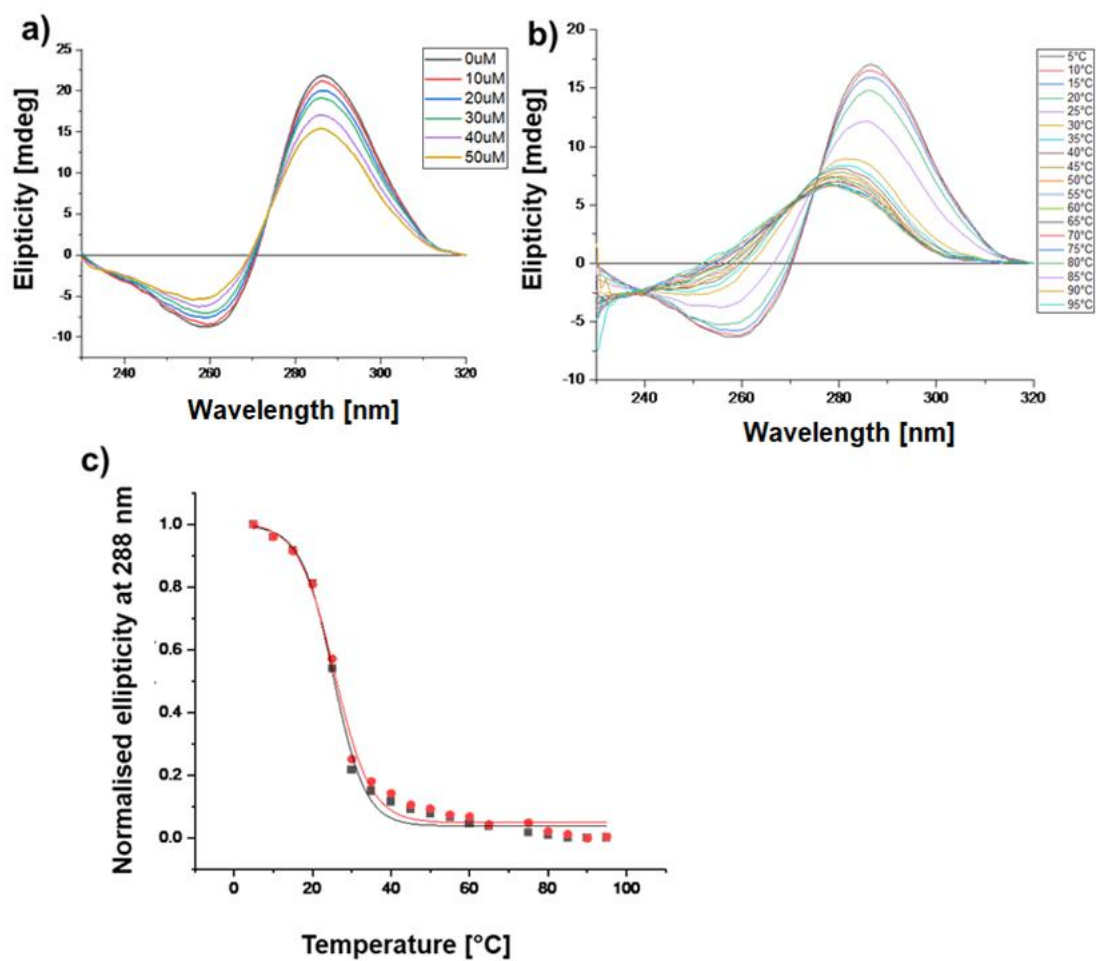

**Figure 11S.** CD experiments of 10  $\mu\text{M}$  hif-1- $\alpha$  in 10 mM sodium cacodylate, 100 mM KCl, pH 6.8 with compound **2a**: a) titration with 0-50  $\mu\text{M}$  (0-5 eq) of **2a**; b) CD-melt with 50  $\mu\text{M}$  of **2a**; c) melting curve derived from the normalised ellipticity at 288 nm in the absence (black) and presence (red) or compound **2a**.

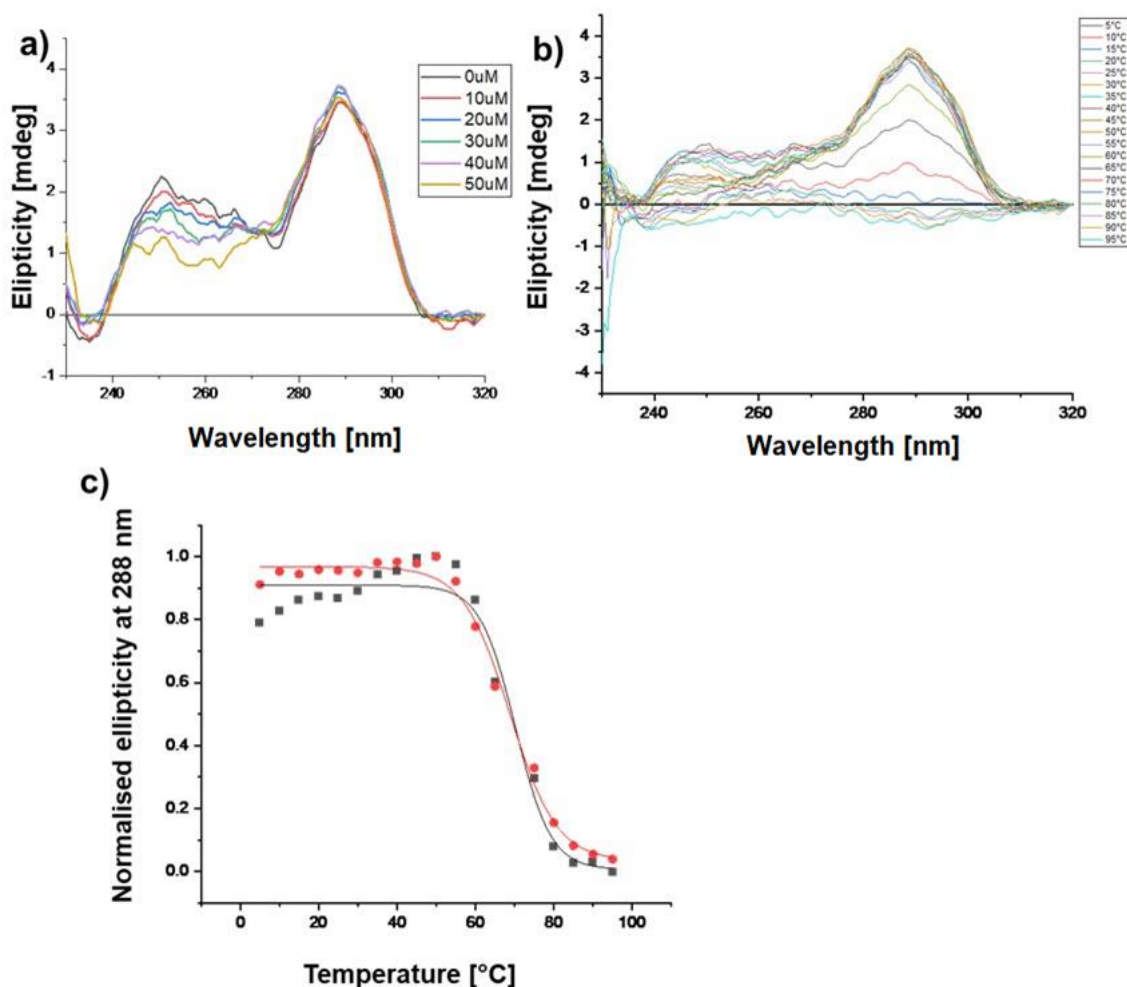

**Figure 12S.** CD experiments of 10  $\mu\text{M}$  hTeloG in 10 mM sodium cacodylate, 100 mM KCl, pH 7.0 with compound **2a**: a) titration with 0-50  $\mu\text{M}$  (0-5 eq) of **2a**; b) CD-melt with 50  $\mu\text{M}$  of **2a**; c) melting curve derived from the normalised ellipticity at 288 nm in the absence (black) and presence (red) or compound **2a**.

**Table 13S.** Change in melting temperature ( $\Delta T_m$ ) of hTeloC, DAP, hif-1- $\alpha$  and hTeloG measured by CD-melting experiments for **2a-b**. Errors represent standard deviations from at least duplicate experiments.

| Entry | Compound  | $\Delta T_m / [^\circ\text{C}]$ |                              |                             |                              |
|-------|-----------|---------------------------------|------------------------------|-----------------------------|------------------------------|
|       |           | hTeloC                          | DAP                          | hif-1- $\alpha$             | hTeloG                       |
| 1     | <b>2a</b> | $-8.1 \pm 0.8^\circ\text{C}$    | $-1 \pm 0.1^\circ\text{C}$   | $0.1 \pm 0.3^\circ\text{C}$ | $-0.3 \pm 0.8^\circ\text{C}$ |
| 2     | <b>2b</b> | $-2.1 \pm 0.1^\circ\text{C}$    | $-0.7 \pm 0.6^\circ\text{C}$ | $0.3 \pm 0.9^\circ\text{C}$ | $-0.7 \pm 0.6^\circ\text{C}$ |



## 9. References

- 1 H. K. Maliszewska, D. L. Hughes and M. P. Muñoz, *Dalton Trans.*, 2020, **49**, 4034–4038.
- 2 B. M. Trost, R. Braslau, *Tetrahedron Lett.*, 1988, **29**, 1231–1234.
- 3 T. Kataoka, H. Yoshimatsu, Y. Noda, T. Sato, H. Shimazu, M. Hori, *J. Chem. Soc. , Perkin Trans. I*, 1993, **19**, 121–129.
- 4 S. Ushijima, S. Dohi, K. Moriyama and H. Togo, *Tetrahedron*, 2012, **68**, 1436–1442.
- 5 T. Hirayama, S. Ueda, T. Okada, N. Tsurue, K. Okuda and H. Nagasawa, *Chem. - Eur. J.*, 2014, **20**, 4156–4162.
- 6 A. Nagaki, S. Yamada, M. Doi, Y. Tomida, N. Takabayashi and J. Yoshida, *Green Chem.*, 2011, **13**, 1110–1113.
- 7 J. Mazuela, O. Pàmies and M. Diéguez, *Chem. - Eur. J.*, 2013, **19**, 2416–2432.
- 8 G. C. Nandi, B. M. Rathman and K. K. Laali, *Tetrahedron Lett.*, 2013, **54**, 6258–6263.
- 9 M. Murai, S. Kitabata, K. Okamoto, K. Ohe, *Chem. Commun.*, 2012, **48**, 7622–7624.
- 10 S. Löhr, J. Averbek, M. Schürmann and N. Krause, *Eur. J. Inorg. Chem.*, 2008, 552.
- 11 A. Gaballa, C. Wagner, H. Schmidt and D. Steinborn, *Z. Für Anorg. Allg. Chem.*, 2003, 629, 703–710.
- 12 J. Pytkowicz, S. Roland, P. Mangeney, G. Meyer and A. Jutand, *J. Organomet. Chem.*, 2003, **678**, 166–179.
- 13 S. C. Söderman and A. L. Schwan, *J. Org. Chem.*, 2012, **77**, 10978–10984.
- 14 C. Nieto-Oberhuber, M. P. Muñoz, S. López, E. Jiménez-Núñez, C. Nevado, E. Herrero-Gómez, M. Raducan and A. M. Echavarren, *Chem. - Eur. J.*, 2006, **12**, 1677–1693.
- 15 H.-Y. Lee, H. Y. Kim, H. Tae, B. G. Kim and J. Lee, *Org. Lett.*, 2003, **5**, 3439–3442.
- 16 P. Cao, B. Wang and X. Zhang, *J. Am. Chem. Soc.*, 2000, **122**, 6490–6491.
- 17 T. R. Hoye and J. A. Suriano, *Organometallics*, 1992, **11**, 2044–2050.
- 18 F. Schröder, C. Tugny, E. Salanouve, H. Clavier, L. Giordano, D. Moraleda, Y. Gimbert, V. Mouriès-Mansuy, J.-P. Goddard and L. Fensterbank, *Organometallics*, 2014, **33**, 4051–4056.
- 19 M. Méndez, M. P. Muñoz and A. M. Echavarren, *J. Am. Chem. Soc.*, 2000, **122**, 11549–11550.
- 20 A. M. Castaño, M. Ruano and A. M. Echavarren, *Tetrahedron Lett.*, 1996, **37**, 6591–6594.
- 21 A. V. Iosub, *Org. Lett.*, 2019, 7804–7808.
- 22 Y. Quevedo-Acosta, I. D. Jurberg and D. Gamba-Sa, *Org. Lett.*, 2020, **22**, 239–243.
- 23 C. L. Joe and K. L. Tan, *J. Org. Chem.*, 2011, **76**, 7590–7596.
- 24 *Programs CrysAlisPro*, Rigaku Oxford Diffraction Ltd., Abingdon, UK, 2018.
- 25 G. M. Sheldrick, *Acta Cryst.*, 2015, **A71**, 3–8.
- 26 G. M. Sheldrick, *Acta Cryst.*, 2015, **C71**, 3–8.
